1 **Overview of effects of motor learning strategies in neurological and geriatric**  
2 **populations: a systematic mapping review**

3 *Running head: Motor learning strategies in neurological and geriatric populations*

4  
5 Li-Juan Jie PhD,<sup>1\*</sup> Melanie Kleynen PhD,<sup>1\*</sup> Guus Rothuizen MSc,<sup>1</sup> Elmar Kal PhD,<sup>2,3</sup>  
6 Andreas Rothgangel PhD,<sup>1</sup> Susy Braun PhD<sup>1</sup>

7  
8 <sup>1</sup> Research Centre for Nutrition, Lifestyle and Exercise, School of Physiotherapy, Zuyd University of  
9 Applied Sciences, Faculty of Health, Heerlen, The Netherlands

10 <sup>2</sup> College of Health, Medicine and Life Sciences, Brunel University London, UK

11 <sup>3</sup> Centre for Cognitive Neuroscience, Brunel University London, UK

12

13

14

15

16

17

18

19 Acknowledgements: We thank Rachel Slangen for her time and expertise in the risk of bias  
20 assessment. Furthermore, we also want to show our gratitude to Ciaran Apolo and Jorg van Beek,  
21 who helped us extract the data from all the papers during the screening process.

22

23 Statement: During the preparation of this work, the authors used the assistance of an AI language  
24 model provided by OpenAI, known as ChatGPT, to refine writing. After using this tool, the author(s)  
25 thoroughly reviewed and edited the content as needed and take full responsibility for the accuracy  
26 and integrity of the public.

27

28 This study was funded by Regieorgaan SIA (Dutch Organization for Scientific Research Applied  
29 Research Fund) under grant number RAAK.PUB09.001. The funding source had no involvement in  
30 the execution of the study or the analysis of the data. The manuscript was registered at international  
31 platform of registered systematic review and meta-analysis protocols (INPLASY202430056).

32

33 The authors declare no conflict of interest.

34

35 Corresponding author: Li-Juan Jie, Nieuw Eyckholt 300, 6419 DJ Heerlen, 045 400 6060, Li-  
36 Juan.Jie@zuyd.nl

37

38 \* Li-Juan Jie and Melanie Kleynen have contributed equally to this work.

39

40 **Abstract**

41 **Introduction:** Motor learning plays a central role in neurological and geriatric rehabilitation. The wide  
42 range of motor learning strategies and increase in evidence can make it difficult to make informed  
43 decisions about the use of motor learning strategies in practice. This review's aim was to provide a  
44 broad overview of the current state of research regarding the effects of seven commonly used motor  
45 learning strategies to improve functional tasks within older neurological and geriatric populations.

46 **Method:** A systematic mapping review of randomised controlled trials was conducted regarding the  
47 effectiveness of seven motor learning strategies – errorless learning, analogy learning, observational  
48 learning, trial-and-error learning, dual-task learning, discovery learning, and movement imagery –  
49 within the geriatric and neurological population. PubMed, CINAHL, and Embase databases were  
50 searched. The Risk of Bias 2 tool was used to assess bias; additionally, papers underwent screening  
51 for sample size justification.

52 **Results:** Eighty-seven articles were included. Identified articles regarding the effects of the targeted  
53 motor learning strategies started around the year 2000 and mainly emerged since 2010. Eight  
54 different populations were included, e.g. Parkinson's, and stroke. Studies were not equally balanced  
55 across the motor learning strategies or target groups and overall showed a moderate to high risk of  
56 bias. Positive trends regarding effects were observed for dual-tasking, observational learning and  
57 movement imagery.

58 **Conclusions:** The findings show a skewed distribution of studies across motor learning interventions,  
59 which have been researched within a variety of populations. Methodological shortcomings make it  
60 difficult to draw firm conclusions regarding the effectiveness of motor learning strategies. Future  
61 researchers are strongly advised to follow guidelines that aid in maintaining methodological quality.  
62 Moreover, alternative designs fitting the complex practice situation should be considered.

63

64 **Keywords:** Motor learning, systematic review, mapping review, errorless learning, analogy learning,  
65 observational learning, trial-and-error learning, dual-task learning, discovery learning, and movement  
66 imagery.

67

68 Motor learning - defined as a relatively permanent change in performance or behaviour<sup>1</sup> - plays a  
69 central role in the rehabilitation of neurological and geriatric rehabilitation.<sup>2-4</sup> Healthcare professionals,  
70 such as physical and occupational therapists, support patients to acquire or relearn a broad range of  
71 different motor skills, e.g. walking or reaching, to help them regain independence in activities of daily  
72 living (ADLs).<sup>1-4</sup> Certain general principles of skill training, like the frequency and specificity of  
73 practice and number of repetitions, are now widely recognised as being crucial to effective  
74 rehabilitation. In the last two decades, evidence has accumulated to suggest that *how* skills are taught  
75 may also be of relevance,<sup>5,6</sup> and guidelines now recommend incorporating motor learning strategies  
76 (e.g. implicit and explicit motor learning) into treatment approaches to improve rehabilitation success.<sup>7</sup>  
77 However, in many cases, there remains a lack of clear guidance on how different motor learning  
78 strategies can best be incorporated (and which can best be used for whom).<sup>7-9</sup> The vast variety of  
79 motor learning strategies from which health care professionals can choose, together with the rapid  
80 growth in publications and lack of overview of the effectiveness of these different strategies make it  
81 challenging to make informed decisions regarding the appropriate treatment approach and motor  
82 learning strategies. Further, many healthcare professionals seem to acquire novel knowledge  
83 unsystematically and in a fragmented manner.<sup>9,10</sup>

84 In order to support clinicians' decision-making and aid evidence-based implementation of motor  
85 learning strategies in their clinical practice, Kleynen and colleagues<sup>11</sup> developed a practical framework  
86 based on the broad distinction between conscious and non-conscious attributes of the motor learning  
87 process. This distinction proposes that implicit motor learning targets more non-conscious attributes  
88 of the motor learning process, whereas explicit motor learning targets more conscious attributes of the  
89 motor learning process.<sup>12,13</sup> The framework includes seven common motor learning strategies, which  
90 have been categorised as promoting more implicit or explicit motor learning: errorless learning, dual-  
91 task learning, analogy learning, discovery learning, observational learning, movement imagery, and  
92 trial-and-error learning.<sup>11,14</sup> The framework was informed by practice-based evidence from experts in  
93 different fields (e.g. researchers, health care professionals) as well as by research results that  
94 underpin these different learning strategies' working mechanisms. Currently, most evidence regarding  
95 the effectiveness of more implicit and explicit forms of motor learning is based on studies using  
96 laboratory tasks, e.g. Kal et al.<sup>15</sup> To support healthcare professionals in making informed decisions

97 about the use of the seven motor learning strategies, more insight into their effectiveness in functional  
98 tasks is needed.

99

100 Systematic reviews potentially provide therapists with an accessible overview of available evidence to  
101 support their decision-making process. However, these reviews are often limited to a single motor  
102 learning strategy (e.g. errorless learning) within specific target populations (e.g. pathology- or  
103 disease-based), and focus on a single measurement outcome as to allow data pooling or synthesis  
104 (e.g., see<sup>16-18</sup> for excellent examples). In clinical practice, however, therapists treat various  
105 populations with a great variety of motor problems (and thus outcomes), rehabilitation needs, and  
106 preferences. Therapists therefore may need to switch between strategies, both within and between  
107 patients, to provide an optimal learning environment – but lack clear guidance to base this on as more  
108 comprehensive overview of the motor learning literature is lacking. This study's aim was to perform a  
109 systematic mapping review of randomised controlled trials (RCTs) to provide a comprehensive  
110 overview of the effects across the seven motor learning strategies incorporated in Kleynen et al.'s  
111 motor learning framework<sup>11</sup> for neurological and geriatric populations. In addition, the content of the  
112 interventions is described to gain more insight into how therapists could perform the different  
113 strategies in clinical practice.

114

## 115 **Methods**

116 This systematic review was conducted in two parts. The first part consisted of a quantitative analysis  
117 and focused on mapping the included studies to gain a quick overview of how many were published  
118 per (sub)population and per motor learning strategy over time. The second part included a descriptive  
119 analysis of motor learning intervention contents and effects, critically appraised in light of the studies'  
120 risk of bias and sample size justification.

121

### 122 ***Eligibility criteria***

123 The population included all adults older than 60 and was not restricted to certain disorders. However,  
124 to optimise the search strategy, potentially relevant populations were specifically included in the  
125 search function (see search strategy). To ensure that the included studies would have direct clinical  
126 relevance, these studies' aim should be a performance improvement in a functional movement task.

127 We defined a functional task as an activity that individuals perform as part of their daily routine, work,  
128 hobbies, or rehabilitation program. The control intervention group (comparator) was not predefined.  
129 The eligibility criteria for the selection of studies are presented in Table 1.

130

131 \*\*\* Table 1, about here \*\*\*

132

### 133 ***Search strategy***

134 Two researchers (LJ, GR) searched the databases PubMed, CINAHL, and Embase for randomised  
135 controlled trials using the following combination of key search terms: ageing (older adults) OR  
136 neurological diseases (stroke OR parkinson OR dementia) AND motor learning strategies (analogy  
137 learning OR errorless learning OR trial and error OR discovery learning OR dual-task learning OR  
138 action observation OR mental practice) AND Activities of Daily Living (functional tasks). A detailed  
139 overview of the search strategy and the search terms used can be found in Appendix A. Additionally,  
140 reference tracking of the included studies was performed to identify additional studies.

141

### 142 ***Study selection process***

#### 143 *Identification and screening of studies*

144 Two researchers (GR, LJ) independently screened all retrieved articles from the databases based on  
145 the title, abstract, and keywords. After screening, the same two researchers obtained and assessed  
146 the full text of eligible articles independently according to the predefined selection criteria. In case of  
147 persistent disagreement, a third reviewer (MK) was consulted to reach a consensus.

148

#### 149 *Risk of bias assessment and sample size justification*

150 The Cochrane Risk of Bias 2 (RoB2; <sup>19</sup>) was used to evaluate five different domains of bias, namely,  
151 randomisation, deviations from the intended intervention, missing outcome data, measurements of the  
152 outcome, and reporting of results. Based on specific criteria for each domain, an overall risk of bias  
153 was determined for every study, ranging from low risk of bias (green) to some concerns (yellow) to  
154 high risk of bias (red). Given the large number of studies included, a total of seven assessors (LJ, MK,  
155 GR, AR, EK, SB, RS) were involved in rating the risk of bias. To increase the reliability of the ratings,  
156 four calibration sessions were organised in which each item was discussed and further specified for

157 the context of this study. Each article was assessed by two independent assessors. In case of  
158 disagreements, a third researcher was consulted. Authors of the included studies were not contacted  
159 to retrieve missing information. In addition to the standard RoB2 items, one extra item regarding the  
160 studies' sample sizes was added, since appropriate sample size justifications are often lacking or not  
161 transparently described.<sup>20</sup> Studies were also evaluated based on whether an a priori power analysis  
162 or other form of sample size justification was described. If sample size justification was described and  
163 achieved, this was categorised as 'green'. If no appropriate size justification was provided or the  
164 required sample size was not achieved, this was categorised as 'red'.

165

#### 166 ***Data extraction***

167 The following characteristics were extracted: year of publication, author, number of participants in total  
168 and per intervention/control group, population studied, gender, mean age, movement task trained,  
169 type of motor learning strategy/intervention, frequency and total duration of supervised practice,  
170 movement performance measures, assessment time points, and between-group effects.

171

#### 172 ***Data analyses and synthesis***

173 The analysis was divided into 1) a quantitative analysis in which the current available studies were  
174 mapped (Q1-3) and 2) a descriptive analysis of the studies' characteristics, the content of the  
175 intervention, and synthesis of the potential effects (Q4). For the quantitative analysis, all eligible  
176 articles were included. In the descriptive analysis, to increase the reliability of this study's conclusion  
177 regarding intervention effects, a second selection took place in which studies that scored 'high' on  
178 RoB2 and lacked (or failed to meet) an appropriate sample size justification were excluded.

179

180 As part of the quantitative analysis, a flowchart was presented to visualise the search and selection  
181 procedure. Further, the number of included studies per learning strategy over time and the type of  
182 patient population per learning strategy were mapped. An overview table per learning strategy was  
183 created presenting the risk of bias (low, some concerns, or high), sample size justification (yes/no),  
184 population, number of participants, and task trained.

185

186 As part of the descriptive analysis, more in-depth information was provided regarding the population  
187 (type, group sizes, gender, age), intervention (motor learning strategy(ies), control intervention(s)),  
188 duration and frequency, task trained, movement performance measurement, and measurement  
189 moments (e.g. immediately after the intervention and, if applicable, also at follow-up). In the last step,  
190 we descriptively synthesised between group differences, both in terms of significance and direction of  
191 effects.

192

## 193 **Results**

194

### 195 ***Study selection***

196 The study flow is visualised in Figure 1. In total, 2099 articles were identified. After deleting duplicates  
197 and screening the titles and abstracts, 236 articles remained, of which five articles could not be  
198 retrieved. The full text of 231 articles was obtained, and after screening, 90 were considered eligible  
199 and included for further analysis. Within this sample, there were three occasions in which the data of  
200 one single RCT was analysed in two different papers.<sup>21-25</sup> These papers were counted once, leading  
201 to a grand total of 87 studies included in the current review.

202

203 \*\*\* Figure 1, about here \*\*\*

204

### 205 ***Quantitative analysis (mapping)***

206 In total, 87 studies were included. Six of the seven motor learning strategies were addressed (Figure  
207 2). The most frequently described motor learning strategies were dual-task learning (n = 50 studies),  
208 mental practice (n = 19), and action observation (n = 12); no studies were found for discovery learning  
209 within these target populations. In total, eight different populations were identified within the included  
210 studies (Figure 2). Figure 3 visualises the number of studies published for each learning strategy over  
211 time.

212

\*\*\* Figures 2 and 3, about here \*\*\*

213

214

215 An overview of the risk of bias scores, power, group size, tasks, and between-group differences is  
216 reported in Table 2. Of the 87 studies, 5 scored well on both the RoB (low) and sample size  
217 justification, while 18 had a high RoB and did not report a sample size justification. Included studies'  
218 group sizes ranged from 6 to 161 participants.

219

220

221 \*\*\* Table 2, about here \*\*\*

222

### 223 ***Descriptive analysis***

224 Sixty-nine studies were left for the descriptive analyses, the results which are presented below per  
225 learning strategy.

226

#### 227 *Analogy learning*

228 One study was included, with a sample size of 79 participants.<sup>26</sup> The task trained in the experimental  
229 group was walking in community-dwelling individuals after stroke. The practised gait parameters were  
230 chosen based on the patients' preferences and needs, as well as the clinical expertise of the  
231 therapists involved in the trial. The analogy learning instructions were personalised based on the  
232 individual's walking impairment and preferences. The effectiveness of analogy learning was compared  
233 to an explicit motor learning intervention. No between-group differences were observed either post-  
234 intervention or at the follow-up (low RoB, appropriate sample size justification). The intervention's  
235 duration was 3 weeks. The total intensity of training (i.e. the number of sessions multiplied by the  
236 duration of each session) was 270 minutes over 9 sessions. See Table 3 for more details.

237

238

239 \*\*\* Table 3 about here \*\*\*

240

#### 241 *Errorless learning and trial & error*

242 Three studies were included, with sample sizes ranging from 30 to 161. Two studies included persons  
243 with Alzheimer's, of which one study trained ADL activities that were based on the patients'  
244 preferences and needs,<sup>28</sup> and the other practised a functional arm-hand task from the Action  
245 Programme test.<sup>29</sup> Furthermore, one other study included participants with transtibial amputations and



246 trained the right technique for fitting a prosthetic limb.<sup>30</sup> The effectiveness of errorless learning was  
247 examined in comparison to trial and error (n = 3).

248

249 The errorless learning intervention was structured in different ways. Frequent feed-forward  
250 instructions (i.e. 'how to do') were provided before initiation of the task. To minimise mistakes, some  
251 studies also provided cues verbally or pictorially (e.g. <sup>29,31</sup>). In contrast to the errorless learning  
252 intervention, in the trial-and-error studies, participants were allowed to make mistakes and self-correct  
253 their performance. In some studies, open-ended questions about the task were posed to participants  
254 when repeated mistakes were observed (e.g. <sup>28</sup>).

255

256 One study<sup>29</sup> observed between-group differences in favour of the errorless learning intervention at the  
257 follow-up measurement; however, there are some concerns about RoB and a lack of sample size  
258 justification. Another study<sup>30</sup> observed between-group differences post-intervention (some concerns  
259 about RoB, appropriate sample size justification). One study<sup>28</sup> did not observe any between-group  
260 differences (low RoB, proposed sample size was not met in intention-to-treat analyses).

261

262 The total study duration of these interventions ranged from one single session<sup>29,30</sup> up to 10 weeks.<sup>28</sup>

263 The total intensity of training (i.e. the number of sessions multiplied by the duration of each session)  
264 ranged from 15-30 minutes in one session<sup>30</sup> to 540 minutes over 10 training sessions.<sup>28</sup> Kessels and  
265 Olde Hensken<sup>29</sup> did not specify the amount of time spent in each session. See Table 4 for more  
266 details.

267

268

269 \*\*\* Table 4 about here \*\*\*

270

### 271 Mental practice

272 Eleven studies were included with sample sizes ranging from 11 to 121 participants. Two studies  
273 included people with Parkinson's, both focusing on gait.<sup>33,34</sup> One study included participants after total  
274 knee arthroplasty and practised knee extension.<sup>35</sup> Eight studies included people after stroke, two of  
275 which focusing on gait,<sup>36,37</sup> three on upper limb activities,<sup>38-40</sup> two on daily life activities,<sup>41-43</sup> and one

276 on sit-to-stand transfers.<sup>44</sup> The effectiveness of mental practice was examined in comparison to  
277 relaxation (n = 2), care as usual (n = 5), cognitive exercises (or mental rehearsal; n = 3), and  
278 standardised activities for the upper limbs (n = 1), and two studies specifically described that the  
279 intervention included a demonstration-then-practice element.

280

281 Mental practice interventions were often based on standardised protocols, scripts, or frameworks. The  
282 different stages of the mental practice intervention often included familiarisation with the task (e.g.  
283 analysis of the task sequence) and mental practice aspects (e.g. kinematic components), followed by  
284 internal imagery, mental rehearsal, and overt task performance. Two studies used audio instructions,  
285 while in one other study, the mental practice intervention was guided by a computer program.  
286 Different types of mental practice reported in the studies included kinaesthetic, visual, and  
287 motivational imagery.

288

289 One study<sup>42</sup> observed between-group differences in favour of the intervention post-intervention and at  
290 the follow-up measurement (some concerns about RoB, sample size justification lacking). Five  
291 studies<sup>34,35,39,43,44</sup> observed between-group differences in favour of the mental practice intervention  
292 post-intervention (RoB ranged from some concerns to high, one with appropriate sample size  
293 justification). Three studies<sup>33,38,41</sup> did not find any between-group differences (all with some concerns  
294 about RoB, two with appropriate sample size justification), and one study<sup>36</sup> did not calculate any  
295 between-group differences.

296

297 The total study duration of these interventions ranged from 3 weeks<sup>36 42,43</sup> up to 6 weeks.<sup>39</sup> The total  
298 intensity of training (i.e. the number of sessions multiplied by the duration of each session) ranged  
299 from 180 minutes over 12 sessions<sup>36</sup> to 900 minutes over 15 training sessions.<sup>42,43</sup> Braun et al.<sup>33,41</sup> did  
300 not specify the amount of time spent in each session. See Table 5 for more details.

301

302

\*\*\* Table 5 about here \*\*\*

303

304

305 Observational learning

306 Eleven included studies had sample sizes ranging from 18 to 102 participants. Three studies included  
307 people after stroke who only practised upper limb activities.<sup>51-53</sup> Five studies included people with  
308 Parkinson's, focusing on gait in general (n = 1)<sup>54</sup> or freezing of gait in particular (n = 4).<sup>25,55-57</sup> Two  
309 studies included orthopaedic patients in which daily activities,<sup>58</sup> mobilisation exercises, and transfers<sup>59</sup>  
310 were trained. One study included older adults who practised walking.<sup>60</sup>

311

312 In all studies, observational learning was combined with or integrated into different types of functional  
313 training. In all studies, observational learning was applied through watching short movies of the task,  
314 exercise, or strategy to be learned. One study used videos that were composed of images and  
315 sounds (sonification).<sup>25</sup> Most studies (n = 9) investigated the effects of observing functional  
316 movements in comparison to observation of landscape videos or abstract pictures.<sup>51,53-60</sup> Two studies  
317 compared observational learning to a functional training intervention without (action) observation.<sup>52,61</sup>

318

319 Four studies<sup>51,53,60,61</sup> observed between-group differences in favour of the action observation  
320 intervention post-intervention and at the follow-up measurement (all with some concerns about RoB,  
321 three with appropriate sample size justification). Five studies<sup>52,55,56,58,59</sup> observed between-group  
322 differences in favour of the intervention at either of the measurement points (all with some concerns  
323 about RoB, two with appropriate sample size justification). One study<sup>54</sup> did not find any between-  
324 group differences (some concerns about RoB, appropriate sample size justification), and one study<sup>57</sup>  
325 did not calculate any between-group differences.

326

327 The total study duration of these interventions ranged from 8 days<sup>54</sup> up to 8 weeks.<sup>61</sup> The total  
328 intensity of training (i.e. the number of sessions multiplied by the duration of each session) ranged  
329 from 432 minutes over 18 sessions<sup>58</sup> to 960 minutes over 16 training sessions.<sup>61</sup> Jaywant et al.<sup>54</sup> did  
330 not specify the amount of time spent in each session. See Table 6 for more details.

331

332 \*\*\* Table 6 about here \*\*\*

333

334 Dual-task learning

335 Forty-three studies were included, with a sample size ranging from 12 to 134. Three included persons  
336 after stroke, of which two studies<sup>62,63</sup> practised walking and one study<sup>64</sup> practised daily life activities.  
337 Three studies included orthopaedic patients, who all practised balance exercises.<sup>65-68</sup> Five studies  
338 included persons with dementia, and all practised walking and/or balance tasks.<sup>69-73</sup> Six studies  
339 included people with Parkinson's, of which two studies focused on balance training,<sup>74,75</sup> three  
340 practised walking,<sup>76-78</sup> and one practised aquatic exercises.<sup>21</sup> Seventeen studies included older adults,  
341 of which 13 practised walking and/or balance exercises<sup>79-91</sup> and the other studies practised aerobic  
342 exercises,<sup>92</sup> stepping exercises,<sup>93</sup> resistance training,<sup>94</sup> stationary biking,<sup>95</sup> or agility and strength  
343 training.<sup>96</sup> Three studies included older adults with balance impairments and practised walking and/or  
344 balance.<sup>24,96-98</sup> One study included older adults with fall histories and practised walking and balance.<sup>99</sup>  
345 Three studies included older adults with cognitive impairments and practised walking and/or  
346 balance<sup>100,101</sup> or dancing.<sup>102</sup>

347

348 Within the dual-task conditions, the secondary task was either a motor or a cognitive task. Secondary  
349 motor tasks included (avoiding) obstacles, carrying or playing with obstacles (e.g. a grocery bag, a  
350 tray, rattle, umbrella, or musical instruments), exercises with a ball (e.g. bouncing, passing, throwing,  
351 catching, holding, kicking) practicing daily life activities such as (un)buttoning a shirt, putting beans in  
352 a container (non-dominant hand) and unscrewing a nut and bolt, drawing a letter on the floor with one  
353 of their feet. Secondary cognitive tasks included engaging in conversations; singing; arithmetic tasks  
354 (e.g. 2-forward and 3-backward calculations); repeating animals' names; reading words or sentences  
355 backwards; counting/reciting the days of week; simple word games (e.g. coming up with a word that  
356 starts with the last letter of the previous word or naming as many words starting with the letter P (or  
357 another random letter); remembering cards; repeating phrases; playing phonemic word chain games;  
358 reciting a poem; answering questions about the participants' orientation to a person (identifying their  
359 name), time (date, month, or year), and place (current location); reacting to virtual situations (e.g.  
360 you're in a taxi but do not have your wallet); explaining the order of wearing clothes (e.g. dress, skirt,  
361 shirt, tie); talking about daily routines; making a shopping list; categorisation (e.g. types of land  
362 animals, drinks, colours, objects, boys' and girls' names, flowers, vegetables, fruit); clock face task;  
363 alternative uses (e.g. name an object and come up with alternative uses for that object); a creativity  
364 task (e.g. name as many objects that you know that are tall); letter fluency task; planning; singing a

365 song; comparing drawings and naming differences; word spelling (fast as possible); auditory Stroop  
366 task; remembering shapes and colours; responding to auditory cues (fast as possible); and paying  
367 attention to tripping hazards. Finally, secondary tasks presented through VR games, e.g. playing a  
368 ball game, reactive boxing game, or cleaning windows.

369

370 Eight studies observed between-group differences<sup>70,71,77,94,101,103,104</sup> in favour of the dual-task learning  
371 intervention post-intervention and at the follow-up measurement (two studies with low RoB, six with  
372 some concerns about RoB, three with appropriate sample size justification). Nineteen studies<sup>24,64-66,72-  
373 74,78,81,83,86-90,97-99,105</sup> observed between-group differences only immediately after the intervention (two  
374 with low RoB, 13 with some concerns about RoB, four with high RoB, 13 with appropriate sample size  
375 justifications). Eleven studies<sup>62,63,67,69,75,79,80,84,85,93,95</sup> did not observe any between-group differences  
376 (all with some concerns about RoB, three with appropriate sample size justifications). Five  
377 studies<sup>76,96,100,102,106</sup> did not report the between-group effects (one with low RoB, four with some  
378 concerns about RoB, three with appropriate sample size justifications).

379

380 The total study duration of these interventions ranged from 1 day<sup>83</sup> up to 26 weeks.<sup>87,92</sup> The total  
381 intensity of training (i.e. the number of sessions multiplied by the duration of each session) ranged  
382 from 40 minutes in one session<sup>83</sup> to 4875 minutes over 65 training sessions.<sup>92</sup> See Table 7 for more  
383 details.

384

385

386 \*\*\* Table 7 about here \*\*\*

387

## 388 Discussion

389

390 This systematic mapping review provides a broad overview of the available studies on seven motor  
391 learning strategies, including their effect on improving functional tasks in neurological and geriatric  
392 populations. In total, 87 studies were identified, covering six of the seven included motor learning  
393 strategies. The most frequently researched motor learning strategies were dual-task learning (n = 50

394 studies), mental practice (n = 19), and action observation (n = 12). No studies were found for  
395 discovery learning.

396

### 397 **Overview of available studies**

398 Mapping of the publications gave more insight into the development of publications over time and the  
399 distribution and quality of RCTs regarding the seven strategies and different target groups. In the early  
400 1990s, new scientific insights were published regarding recovery mechanisms and neuroplasticity of  
401 the brain, which fuelled interest in the potential role of motor learning in rehabilitation.<sup>107</sup> Research on  
402 the effects of motor learning strategies to improve functional tasks started around the year 2000, with  
403 studies on mental practice and publications increasing substantially from 2010 on. In general, there  
404 seems to be quite a big delay between the discovery of a learning strategy's (potential) working  
405 mechanisms and its evaluation in applied research through RCTs. For example, the mirror-neuron  
406 system and its role in our ability to learn by imitating others was discovered in the early 1990s,<sup>108,109</sup>  
407 but it took about 20 years before the effects were evaluated within rehabilitation. Comparably, Mellit  
408 and Petit<sup>110</sup> showed through fMRI that during imagery and performance of a motor skill, almost the  
409 same brain areas are active, which gave a huge impulse for research on movement imagery in sports.  
410 But it wasn't until 2007 that an increase in studies within (neuro)rehabilitation was seen.

411

412 Based on the results of our Delphi study<sup>111</sup>, we expected the number of included studies to be  
413 (somewhat) equally balanced across the motor learning strategies. After all, a substantial number of  
414 experts had identified these seven motor learning strategies as the 'most used and well-known'  
415 strategies within their field. This was, however, not the case. By far, dual-task learning has been  
416 examined the most. There are several reasons which may explain why. First, dual-tasking is highly  
417 prevalent in daily life activities and needs to be practised as such in every context (specificity).<sup>112</sup>  
418 Additionally, some of the first clinical studies conducted showed very promising results (e.g.<sup>23,24,68</sup>)  
419 which might have led to an increase in similar, repetitive research paradigms: in 38 of the 50 included  
420 studies, walking or balance was trained using a secondary cognitive task. Interestingly, no studies on  
421 the use of discovery learning were included (one was excluded during the screening process). And  
422 only two studies on analogy learning fulfilled our inclusion criteria.<sup>26,27</sup> This may be explained by the  
423 fact that analogy learning is a relatively new concept, which was first translated to rehabilitation in

424 2014 for persons after stroke<sup>113</sup> and with Parkinson's disease.<sup>26,27,114</sup> Trial-and-error learning was not  
425 researched as the experimental intervention in the included studies but was only used as a control  
426 condition for errorless learning in four studies. This is contrary to other fields of research (e.g.  
427 children, sports), in which trial-and-error learning and discovery learning have been assessed more  
428 extensively.<sup>115</sup>

429

430 Although the target population was defined broadly in our search and inclusion criteria, motor learning  
431 strategies were studied in only five populations. Older adults (without other specific motor or cognitive  
432 problems) were the most researched, followed by persons with Parkinson's disease and after stroke.  
433 No studies were found on other neurological diseases such as multiple sclerosis, spinal cord injury, or  
434 traumatic brain injury. Within the included population, certain motor learning strategies appeared to be  
435 preferred over others. Errorless learning, for example, was almost exclusively researched in persons  
436 with dementia, dual-task learning was mostly studied in older adults, and mental practice was often  
437 used in studies to improve arm-hand ability in people after stroke. Based on clinical expertise these  
438 strategies may be seen as more suitable for these specific populations, but evidence for their effects  
439 is still unclear.

440

441 A critical finding of this review is the limited methodological rigour observed across the 87 included  
442 studies. Specifically, only five studies (6%) had a low risk of bias and justified *and* achieved their  
443 desired sample size. Most of the studies scored 'some concerns' (54 studies; 62%). The lack of a  
444 strong methodological foundation in many studies makes it difficult to reliably identify the true  
445 intervention effects.<sup>116</sup> We also noted that the interpretation of individual study findings was frequently  
446 inaccurate (e.g. solely reported within-group differences and/or interaction effects without reporting  
447 between-group differences). There seems to be a more general problem of regulating the risk of bias  
448 and ensuring the accuracy of the reporting within motor learning research.<sup>117,118</sup>

449

#### 450 ***Effects of the seven motor learning strategies***

451 Only four (5% of total) studies were deemed reliable enough to interpret effects reported, based on  
452 their RoB2 (category green; low RoB), sample size justification (category green), and reporting of  
453 between-group differences: Geroin et al.<sup>77</sup> found between-group differences for dual-task gait and

454 functional training in persons with Parkinson's, Trombetti et al.<sup>87</sup> and Javadpour et al.<sup>81</sup> found  
455 between-group differences for dual-task balance training in older adults, and Jie et al.<sup>26</sup> did not find  
456 significant between-group differences in gait for analogy learning in persons after stroke. Within the  
457 remaining moderately reliable studies, there seems to be a clear positive trend favouring  
458 observational learning across various populations (8/11 studies), when applied in addition to care as  
459 usual. Within mental practice (8/19 studies) and dual-task learning (27/43 studies), between-group  
460 effects favouring the intervention group were found in about half and the majority of the included  
461 studies, respectively. For dual-task learning, some trends may be observed within populations, as  
462 between-group effects in favour of the dual-task interventions were significant for the majority of the  
463 studies in persons with Parkinson's (5/6 studies), dementia (4/5 studies), and older adults with  
464 balance impairments (3/3 studies). Remarkably, two studies in dual-task learning in persons with  
465 dementia<sup>70</sup> and older adults with balance impairments,<sup>98</sup> found between-group differences in favour of  
466 the single-task (control) intervention.

467

#### 468 ***Study limitations***

469 Our search strategy was carefully prepared by experts in the field of literature review and motor  
470 learning. Still, we might have missed studies due to limitations in the search strategy (e.g. specific  
471 included search terms) and the categorisation of studies within databases. Publication bias might  
472 influence our findings; given the diversity of included studies, a funnel plot was not feasible.

473

474 As with any review article, our conclusions are subject to some common points of criticism concerning  
475 the standardised assessment of the studies' quality (Minozzi et al.<sup>119</sup>). Despite careful preparation, we  
476 still experienced that the use of the RoB2 tool left room for interpretation and needed additional effort  
477 to increase the reliability of the assessment. However, missing information in the texts was not  
478 retrieved by contacting the authors. Information not reported is not necessarily information not  
479 retrieved, and therefore, the criteria list assesses the study's report, not necessarily the quality of the  
480 study.

481

482 In line with earlier reviews, we decided to include an additional criterion (i.e. sample size justification)  
483 in our assessment of the included studies. An absence of sample size justification is not inherently



484 problematic but increases uncertainties when evaluating effects.<sup>116</sup> Therefore, we excluded studies  
485 with a high risk of bias and without sample size justification from the descriptive analyses.

486

#### 487 ***Future research***

488 There are several considerations for researchers when conducting applied clinical motor learning  
489 research. Researchers should consider evaluating potential rehabilitation strategies not only *within*  
490 but also *across* populations.<sup>120</sup> Despite the anatomic and pathophysiological differences of target  
491 populations, these groups share many similarities, ranging from comparable cellular and  
492 neuro-physiological responses and recovery mechanisms to the effects of training in motor learning.

493

494 We also think that we should reconsider whether RCTs are the best fit for assessing complex training  
495 interventions. When conducting RCTs, researchers need to choose between internal validity (e.g.  
496 controlled context in laboratory settings) vs external validity reflecting daily practice (e.g. more  
497 ‘uncontrolled’ context with potential biases).<sup>121,122</sup> This may (partly) explain the overall moderate to  
498 high risk of bias and perhaps the absence of effects on some occasions. Hence, researchers should  
499 consider different research designs, e.g. cohort studies or multiple baseline designs, which might be  
500 more suitable for pragmatic trials with complex interventions. To facilitate interpretations of study  
501 results by therapists, researchers should also consider using clinically relevant differences, e.g.  
502 referring to minimally clinically important differences (MCIDs).<sup>123</sup> Likewise, to further increase the  
503 transferability to clinical practice, careful attention should be given to description of the interventions.  
504 The TIDieR (Template for Intervention Description and Replication) can be used as a checklist and  
505 guide to ensure interventions are reported with sufficient detail.<sup>124</sup>

506

#### 507 **Conclusions**

508 The results of this study provide an overview of the current state of evidence regarding seven motor  
509 learning interventions in older neurologic and geriatric rehabilitation. The findings clearly show a  
510 skewed distribution of studies across motor learning interventions that have been researched within  
511 five target populations. The methodological shortcomings, e.g. high risk of bias and lack of  
512 appropriate sample size justifications, make it difficult to draw firm conclusions regarding the  
513 effectiveness of motor learning strategies. Hence, this review cannot provide a strong basis for

514 therapists to rely on in their decision-making. Based on observed trends, therapists may consider (to  
515 continue) using dual-task learning, observational learning and movement imagery. While waiting for  
516 future research, therapists may also consider the other motor learning strategies based on their own  
517 experiences and patients' preferences;  
518 the description of the interventions of the included studies could be an example of how to apply  
519 different strategies in daily practice within the different neurological and geriatric target populations.

## References

1. Schmidt RA, Lee TD. Motor control and learning: a behavioral emphasis. 3rd ed. Champaign, IL: Human Kinetics; 1999.
2. Brach JS, van Swearingen JM. Interventions to improve walking in older adults. *Curr Transl Geriatr Exp Gerontol Rep*. 2013;2:230-8.
3. Kitago T, Krakauer JW. Motor learning principles for neurorehabilitation. *Handb Clin Neurol*. 2013;110:93-103.
4. Leech KA, Roemmich RT, Gordon J, Reisman DS, Cherry-Allen KM. Updates in motor learning: implications for physical therapist practice and education. *Phys Ther*. 2022;102(1):pzab250.
5. Fisher BE, Morton SM, Lang CE. From motor learning to physical therapy and back again: the state of the art and science of motor learning rehabilitation research. *J Neurol Phys Ther*. 2014;38(3):149-50.
6. Scheets PL, Hornby TG, Perry SB, et al. Moving Forward. *J Neurol Phys Ther*. 2021;45(1):46-9.
7. Verbeek J, van Wegen E, van Peppen R, et al. Clinical practice guideline for physical therapy after stroke. KNGF (Koninklijk Nederlands Genootschap voor Fysiotherapie); 2014.
8. Guadagnoli MA, Lee TD. Challenge point: a framework for conceptualizing the effects of various practice conditions in motor learning. *J Mot Behav*. 2004;36(2):212-24.
9. Kafri M, Atun-Einy O. From motor learning theory to practice: a scoping review of conceptual frameworks for applying knowledge in motor learning to physical therapist practice. *Phys Ther*. 2019;99(12):1628-43.
10. Rappolt S, Tassone M. How rehabilitation therapists gather, evaluate, and implement new knowledge. *J Contin Ed Health Prof*. 2002;22(3):170-80.
11. Kleynten M, Beurskens A, Olijve H, Kamphuis J, Braun S. Application of motor learning in neurorehabilitation: a framework for health-care professionals. *Physiother Theory and Pract*. 2018.
12. Masters R. Knowledge, knerves and know-how: the role of explicit versus implicit knowledge in the breakdown of a complex motor skill under pressure. *Br J Psychol*. 1992;83(3):343-58.

13. Masters R, van Duijn T, Uiga L. Advances in implicit motor learning. In: Hodges NJ, Willams MA, editors. Skill acquisition in sport. London: Routledge; 2019. p. 77-96.
14. Kleynen M, Braun SM, Rasquin SM, et al. Multidisciplinary views on applying explicit and implicit motor learning in practice: an international survey. *PloS One*. 2015;10(8):e0135522.
15. Kal E, Winters M, Van Der Kamp J, et al. Is implicit motor learning preserved after stroke? A systematic review with meta-analysis. *PloS One*. 2016;11(12):e0166376.
16. Li Z, Wang T, Liu H, Jiang Y, Wang Z, Zhuang J. Dual-task training on gait, motor symptoms, and balance in patients with Parkinson's disease: a systematic review and meta-analysis. *Clin Rehabil*. 2020;34(11):1355-67.
17. Martino Cinnera A, Bisirri A, Leone E, Morone G, Gaeta A. Effect of dual-task training on balance in patients with multiple sclerosis: a systematic review and meta-analysis. *Clin Rehabil*. 2021;35(10):1399-412.
18. Stockley RC, Jarvis K, Boland P, Clegg AJ. Systematic review and meta-analysis of the effectiveness of mental practice for the upper limb after stroke: imagined or real benefit? *Arch Phys Med Rehabil*. 2021;102(5):1011-27.
19. Sterne JA, Savović J, Page MJ, et al. RoB 2: a revised tool for assessing risk of bias in randomised trials. *BMJ*. 2019;366:l4898.
20. McCrum C, van Beek J, Schumacher C, Janssen S, Van Hooren B. Sample size justifications in *Gait & Posture*. *Gait Posture*. 2022;92:333-7.
21. da Silva AZ, Israel VL. Effects of dual-task aquatic exercises on functional mobility, balance and gait of individuals with Parkinson's disease: a randomized clinical trial with a 3-month follow-up. *Complement Ther Med*. 2019;42:119-24.
22. da Silva AZ, Lucksch DD, Israel VL. Aquatic dual-task training and its relation to motor functions, activities of daily living, and quality of life of individuals with Parkinson's disease: a randomized clinical trial. *Health Serv Insights*. 2023;16:11786329231180768.
23. Silsupadol P, Lugade V, Shumway-Cook A, et al. Training-related changes in dual-task walking performance of elderly persons with balance impairment: a double-blind, randomized controlled trial. *Gait Posture*. 2009;29(4):634-9.

24. Silsupadol P, Shumway-Cook A, Lugade V, et al. Effects of single-task versus dual-task training on balance performance in older adults: a double-blind, randomized controlled trial. *Arch Phys Med Rehabil.* 2009;90(3):381-7.
25. Mezzarobba S, Grassi M, Pellegrini L, et al. Action observation plus sonification. A novel therapeutic protocol for Parkinson's patient with freezing of gait. *Front Neurol.* 2018;8:723.
26. Jie L-J, Kleynen M, Meijer K, Beurskens A, Braun S. Implicit and explicit motor learning interventions have similar effects on walking speed in people after stroke: A randomized controlled trial. *Phys Ther.* 2021;101(5):pzab017.
27. Mak TC, Capio CM, Wong TW. Effects of single-task, dual-task and analogy training during gait rehabilitation of older adults at risk of falling: A randomized controlled trial. *Int J Environ Res Public Health.* 2022;20(1):315.
28. Voigt-Radloff S, de Werd MM, Leonhart R, et al. Structured relearning of activities of daily living in dementia: the randomized controlled REDALI-DEM trial on errorless learning. *Alzheimer's Res Ther.* 2017;9:1-11.
29. Kessels RP, Olde Hensken LM. Effects of errorless skill learning in people with mild-to-moderate or severe dementia: a randomized controlled pilot study. *NeuroRehabilitation.* 2009;25(4):307-12.
30. Donaghey C, McMillan T, O'Neill B. Errorless learning is superior to trial and error when learning a practical skill in rehabilitation: a randomized controlled trial. *Clin Rehabil.* 2010;24(3):195-201.
31. Bourgeois J, Laye M, Lemaire J, et al. Relearning of activities of daily living: a comparison of the effectiveness of three learning methods in patients with dementia of the Alzheimer type. *J Nutr Health Aging.* 2016;20(1):48-55.
32. Thivierge S, Jean L, Simard M. A randomized cross-over controlled study on cognitive rehabilitation of instrumental activities of daily living in Alzheimer disease. *Am J Geriatr Psychiatry.* 2014;22(11):1188-99.
33. Braun S, Beurskens A, Kleynen M, Schols J, Wade D. Rehabilitation with mental practice has similar effects on mobility as rehabilitation with relaxation in people with Parkinson's disease: a multicentre randomised trial. *J Physiother.* 2011;57(1):27-34.

34. El-Wishy AA, Fayed ES. Effect of locomotor imagery training added to physical therapy program on gait performance in Parkinson patients: a randomized controlled study. *Egypt J Neurol Psychiat Neurosurg.* 2013;50(1):31-7.
35. Paravlic AH, Pisot R, Marusic U. Specific and general adaptations following motor imagery practice focused on muscle strength in total knee arthroplasty rehabilitation: a randomized controlled trial. *PLoS One.* 2019;14(8):e0221089.
36. Dickstein R, Deutsch JE, Yoeli Y, et al. Effects of integrated motor imagery practice on gait of individuals with chronic stroke: a half-crossover randomized study. *Arch Phys Med Rehabil.* 2013;94(11):2119-25.
37. Guerra ZF, Bellose LC, Ferreira AP, Faria CD, Paz CC, Lucchetti G. Effects of mental practice on mobility of individuals in the early subacute post-stroke phase: A randomized controlled clinical trial. *J Bodyw Mov Ther.* 2022;32:82-90.
38. Ietswaart M, Johnston M, Dijkerman HC, et al. Mental practice with motor imagery in stroke recovery: randomized controlled trial of efficacy. *Brain.* 2011;134(5):1373-86.
39. Page SJ, Levine P, Leonard AC. Effects of mental practice on affected limb use and function in chronic stroke. *Arch Phys Med Rehabil.* 2005;86(3):399-402.
40. Park J-H, Park J-H. The effects of game-based virtual reality movement therapy plus mental practice on upper extremity function in chronic stroke patients with hemiparesis: a randomized controlled trial. *J Phys Ther Sci.* 2016;28(3):811-5.
41. Braun SM, Beurskens AJ, Kleynen M, Oudelaar B, Schols JM, Wade DT. A multicenter randomized controlled trial to compare subacute 'treatment as usual' with and without mental practice among persons with stroke in Dutch nursing homes. *J Am Med Dir Assoc.* 2012;13(1):85. e1-. e7.
42. Liu KP, Chan CC, Lee TM, Hui-Chan CW. Mental imagery for promoting relearning for people after stroke: a randomized controlled trial. *Arch Phys Med Rehabil.* 2004;85(9):1403-8.
43. Liu KP, Chan CC, Wong RS, et al. A randomized controlled trial of mental imagery augment generalization of learning in acute poststroke patients. *Stroke.* 2009;40(6):2222-5.
44. Malouin F, Richards CL, Durand A, Doyon J. Added value of mental practice combined with a small amount of physical practice on the relearning of rising and sitting post-stroke: a pilot study. *J Neurol Phys Ther.* 2009;33(4):195-202.

45. Batson G, Feltman R, McBride C, Waring J. Effect of mental practice combined with physical practice on balance in the community-dwelling elderly. *Activ Adapt Aging*. 2007;31(2):1-18.
46. de Melo Santiago LM, De Oliveira DA, de Macêdo Ferreira LGL, et al. Immediate effects of adding mental practice to physical practice on the gait of individuals with Parkinson's disease: randomized clinical trial. *NeuroRehabilitation*. 2015;37(2):263-71.
47. Korbus H, Schott N. Does mental practice or mirror therapy help prevent functional loss after distal radius fracture? A randomized controlled trial. *J Hand Ther*. 2022;35(1):86-96.
48. Linden CA, Uhley JE, Smith D, Bush MA. The effects of mental practice on walking balance in an elderly population. *Occup Ther J Res*. 1989;9(3):155-69.
49. Monteiro D, Silva LPd, Sá POd, Oliveira ALRd, Coriolano MdGWdS, Lins OG. Mental practice after physiotherapy maintains functional mobility of people with Parkinson's disease. *Fisioter Pesqui*. 2018;25:65-73.
50. Nicholson VP, Keogh JW, Low Choy NL. Can a single session of motor imagery promote motor learning of locomotion in older adults? A randomized controlled trial. *Clin Interv Aging*. 2018:713-22.
51. Franceschini M, Ceravolo MG, Agosti M, et al. Clinical relevance of action observation in upper-limb stroke rehabilitation: a possible role in recovery of functional dexterity. A randomized clinical trial. *Neurorehabil Neural Repair*. 2012;26(5):456-62.
52. Mancuso M, Tondo SD, Costantini E, Damora A, Sale P, Abbruzzese L. Action observation therapy for upper limb recovery in patients with stroke: a randomized controlled pilot study. *Brain Sci*. 2021;11(3):290.
53. Sale P, Ceravolo MG, Franceschini M. Action observation therapy in the subacute phase promotes dexterity recovery in right-hemisphere stroke patients. *BioMed Res Int*. 2014;2014.
54. Jaywant A, Ellis TD, Roy S, Lin C-C, Neargarder S, Cronin-Golomb A. Randomized controlled trial of a home-based action observation intervention to improve walking in Parkinson disease. *Arch Phys Med Rehabil*. 2016;97(5):665-73.
55. Agosta F, Gatti R, Sarasso E, et al. Brain plasticity in Parkinson's disease with freezing of gait induced by action observation training. *J Neurol*. 2017;264:88-101.

56. Pelosin E, Avanzino L, Bove M, Stramesi P, Nieuwboer A, Abbruzzese G. Action observation improves freezing of gait in patients with Parkinson's disease. *Neurorehabil Neural Repair*. 2010;24(8):746-52.
57. Pelosin E, Barella R, Bet C, et al. Effect of group-based rehabilitation combining action observation with physiotherapy on freezing of gait in Parkinson's disease. *Neural Plast*. 2018;2018.
58. Bellelli G, Buccino G, Bernardini B, Padovani A, Trabucchi M. Action observation treatment improves recovery of postsurgical orthopedic patients: evidence for a top-down effect? *Arch Phys Med Rehabil*. 2010;91(10):1489-94.
59. Villafañe JH, Isgro M, Borsatti M, Berjano P, Pirali C, Negrini S. Effects of action observation treatment in recovery after total knee replacement: a prospective clinical trial. *Clin Rehabil*. 2017;31(3):361-8.
60. Rojasavastera R, Bovonsunthonchai S, Hiengkaew V, Senanarong V. Action observation combined with gait training to improve gait and cognition in elderly with mild cognitive impairment A randomized controlled trial. *Dement Neuropsychol*. 2020;14:118-27.
61. Mezzarobba S, Grassi M, Pellegrini L, et al. Action observation improves sit-to-walk in patients with Parkinson's disease and freezing of gait. Biomechanical analysis of performance. *Parkinsonism Relat Disord*. 2020;80:133-7.
62. Fishbein P, Hutzler Y, Ratmansky M, Treger I, Dunsky A. A preliminary study of dual-task training using virtual reality: influence on walking and balance in chronic poststroke survivors. *J Stroke Cerebrovasc Dis*. 2019;28(11):104343.
63. Meester D, Al-Yahya E, Dennis A, et al. A randomized controlled trial of a walking training with simultaneous cognitive demand (dual-task) in chronic stroke. *Eur J Neurol*. 2019;26(3):435-41.
64. An H-S, Kim D-J. Effects of activities of daily living-based dual-task training on upper extremity function, cognitive function, and quality of life in stroke patients. *Osong Public Health Res Perspect*. 2021;12(5):304.
65. Conradsson D, Halvarsson A. The effects of dual-task balance training on gait in older women with osteoporosis: a randomized controlled trial. *Gait Posture*. 2019;68:562-8.



66. Konak HE, Kibar S, Ergin ES. The effect of single-task and dual-task balance exercise programs on balance performance in adults with osteoporosis: a randomized controlled preliminary trial. *Osteoporos Int.* 2016;27:3271-8.
67. Uzunkulaoğlu A, Kerim D, Saime A, Ergin S. Effects of single-task versus dual-task training on balance performance in elderly patients with knee osteoarthritis. *Arch Rheumatol.* 2020;35(1):35.
68. Vaillant J, Vuillerme N, Martigné P, et al. Balance, aging, and osteoporosis: effects of cognitive exercises combined with physiotherapy. *Joint Bone Spine.* 2006;73(4):414-8.
69. Chen Y-L, Pei Y-C. Musical dual-task training in patients with mild-to-moderate dementia: a randomized controlled trial. *Neuropsychiatr Dis Treat.* 2018:1381-93.
70. Ghadiri F, Bahmani M, Paulson S, Sadeghi H. Effects of fundamental movement skills based dual-task and dance training on single-and dual-task walking performance in older women with dementia. *Geriatr Nurs.* 2022;45:85-92.
71. Lemke NC, Werner C, Wiloth S, Oster P, Bauer JM, Hauer K. Transferability and sustainability of motor-cognitive dual-task training in patients with dementia: a randomized controlled trial. *Gerontology.* 2018;65(1):68-83.
72. Menengiç KN, Yeldan İ, Çınar N, Şahiner T. Effectiveness of motor-cognitive dual-task exercise via telerehabilitation in Alzheimer's disease: An online pilot randomized controlled study. *Clin Neurol Neurosurg.* 2022;223:107501.
73. Schwenk M, Zieschang T, Oster P, Hauer K. Dual-task performances can be improved in patients with dementia: a randomized controlled trial. *Neurology.* 2010;74(24):1961-8.
74. Fernandes Â, Rocha N, Santos R, Tavares JMR. Effects of dual-task training on balance and executive functions in Parkinson's disease: a pilot study. *Somatosens Mot Res.* 2015;32(2):122-7.
75. Jäggi S, Wachter A, Adcock M, et al. Feasibility and effects of cognitive–motor exergames on fall risk factors in typical and atypical Parkinson's inpatients: a randomized controlled pilot study. *Eur J Med Res.* 2023;28(1):30.
76. do Nascimento Silva R, Afonso SV, Felipe LR, Oliveira RA, Martins LJP, de Souza LAPS. Dual-task intervention based on trail making test: Effects on Parkinson's disease. *J Bodyw Mov Ther.* 2021;27:628-33.

77. Geroin C, Nonnekes J, de Vries NM, et al. Does dual-task training improve spatiotemporal gait parameters in Parkinson's disease? *Parkinsonism Relat Disord*. 2018;55:86-91.
78. Yang Y-R, Cheng S-J, Lee Y-J, Liu Y-C, Wang R-Y. Cognitive and motor dual task gait training exerted specific training effects on dual task gait performance in individuals with Parkinson's disease: A randomized controlled pilot study. *PloS One*. 2019;14(6):e0218180.
79. Brustio PR, Rabaglietti E, Formica S, Liubicich ME. Dual-task training in older adults: The effect of additional motor tasks on mobility performance. *Arch Gerontol Geriatr*. 2018;75:119-24.
80. Hiyamizu M, Morioka S, Shomoto K, Shimada T. Effects of dual task balance training on dual task performance in elderly people: a randomized controlled trial. *Clin Rehabil*. 2012;26(1):58-67.
81. Javadpour S, Sinaei E, Salehi R, Zahednejad S, Motealleh A. Comparing the effects of single-task versus dual-task balance training on gait smoothness and functional balance in community-dwelling older adults: a randomized controlled trial. *J Aging Phys Activ*. 2022;30(2):308-15.
82. Nascimento MdM, Maduro PA, Rios PMB, et al. The effects of 12-week dual-task physical-cognitive training on gait, balance, lower extremity muscle strength, and cognition in older adult women: a randomized study. *Int J Environ Res Public Health*. 2023;20(8):5498.
83. Pessoa RMC, de Souza Davi GK, Marinho MdFD, et al. Evaluation of immediate interference after intervention with double tasks in elderly individuals. *Top Geriatr Rehabil*. 2020;36(2):86-91.
84. Plummer-D'Amato P, Cohen Z, Dae NA, Lawson SE, Lizotte MR, Padilla A. Effects of once weekly dual-task training in older adults: A pilot randomized controlled trial. *Geriatr Gerontol Int*. 2012;12(4):622-9.
85. Sinaei E, Kamali F, Nematollahi A, Etmiran Z. Comparing the effects of balance training with and without cognitive tasks on the quality of life and balance performance in community-dwelling older adults: a single-blind randomized clinical trial. *J Rehabil Sci Res*. 2016;3(4):91-6.

86. Tasvuran Horata E, Cetin SY, Erel S. Effects of individual progressive single-and dual-task training on gait and cognition among older healthy adults: A randomized-controlled comparison study. *Eur Geriatr Med.* 2021;12:363-70.
87. Trombetti A, Hars M, Herrmann FR, Kressig RW, Ferrari S, Rizzoli R. Effect of music-based multitask training on gait, balance, and fall risk in elderly people: a randomized controlled trial. *Arch Intern Med.* 2011;171(6):525-33.
88. Wollesen B, Mattes K, Schulz S, et al. Effects of dual-task management and resistance training on gait performance in older individuals: a randomized controlled trial. *Front Aging.* 2017;9:415.
89. Wollesen B, Schulz S, Seydell L, Delbaere K. Does dual task training improve walking performance of older adults with concern of falling? *BMC Geriatr.* 2017;17:1-9.
90. Wollesen B, Voelcker-Rehage C, Willer J, Zech A, Mattes K. Feasibility study of dual-task-managing training to improve gait performance of older adults. *Aging Clin Exp Res.* 2015;27:447-55.
91. You JH, Shetty A, Jones T, Shields K, Belay Y, Brown D. Effects of dual-task cognitive-gait intervention on memory and gait dynamics in older adults with a history of falls: a preliminary investigation. *NeuroRehabilitation.* 2009;24(2):193-8.
92. Gregory MA, Gill DP, Zou G, et al. Group-based exercise combined with dual-task training improves gait but not vascular health in active older adults without dementia. *Arch Gerontol Geriatr.* 2016;63:18-27.
93. Kitazawa K, Showa S, Hiraoka A, Fushiki Y, Sakauchi H, Mori M. Effect of a dual-task net-step exercise on cognitive and gait function in older adults. *J Geriatr Phys Ther.* 2015;38(3):133-40.
94. Norouzi E, Vaezmosavi M, Gerber M, Pühse U, Brand S. Dual-task training on cognition and resistance training improved both balance and working memory in older people. *Phys Sportsmed.* 2019;47(4):471-8.
95. Raichlen DA, Bharadwaj PK, Nguyen LA, et al. Effects of simultaneous cognitive and aerobic exercise training on dual-task walking performance in healthy older adults: results from a pilot randomized controlled trial. *BMC Geriatr.* 2020;20:1-10.

96. Uemura K, Yamada M, Nagai K, et al. Effects of dual-task switch exercise on gait and gait initiation performance in older adults: preliminary results of a randomized controlled trial. *Arch Gerontol Geriatr.* 2012;54(2):e167-e71.
97. Azadian E, Torbati HRT, Kakhki ARS, Farahpour N. The effect of dual task and executive training on pattern of gait in older adults with balance impairment: A Randomized controlled trial. *Arch Gerontol Geriatr.* 2016;62:83-9.
98. Khan K, Ghous M, Malik AN, Amjad MI, Tariq I. Effects of turning and cognitive training in fall prevention with dual task training in elderly with balance impairment. *Rawal Med J.* 2018;43(1):124-8.
99. Park J-H. Is dual-task training clinically beneficial to improve balance and executive function in community-dwelling older adults with a history of falls? *Int J Environ Res Public Health.* 2022;19(16):10198.
100. Delbroek T, Vermeylen W, Spildooren J. The effect of cognitive-motor dual task training with the biorescue force platform on cognition, balance and dual task performance in institutionalized older adults: a randomized controlled trial. *J Phys Ther Sci.* 2017;29(7):1137-43.
101. Kuo H-T, Yeh N-C, Yang Y-R, Hsu W-C, Liao Y-Y, Wang R-Y. Effects of different dual task training on dual task walking and responding brain activation in older adults with mild cognitive impairment. *Sci Rep.* 2022;12(1):8490.
102. Parial LL, Kor PPK, Sumile EF, Leung AYM. Dual-Task Zumba Gold for improving the cognition of people with mild cognitive impairment: a pilot randomized controlled trial. *Gerontologist.* 2023;63(7):1248-61.
103. Silva LPd, Duarte MPdS, Souza CdCBd, Lins CCdSA, Coriolano MdGWdS, Lins OG. Effects of mental practice associated with motor physical therapy on gait and risk of falls in Parkinson's disease: a pilot study. *Fisioter Pesqui.* 2019;26:112-9.
104. Valenzuela CSM, Moscardó LD, López-Pascual J, Serra-Añó P, Tomás JM. Effects of dual-task group training on gait, cognitive executive function, and quality of life in people with Parkinson disease: results of randomized controlled DUALGAIT trial. *Arch Phys Med Rehabil.* 2020;101(11):1849-56. e1.

105. Yamada M, Aoyama T, Tanaka B, Nagai K, Ichihashi N. Seated stepping exercise in a dual-task condition improves ambulatory function with a secondary task: a randomized controlled trial. *Aging Clin Exp Res*. 2011;23:386-92.
106. Yamada M, Aoyama T, Hikita Y, et al. Effects of a DVD-based seated dual-task stepping exercise on the fall risk factors among community-dwelling elderly adults. *Telemed e-Health*. 2011;17(10):768-72.
107. Jackson PL, Lafleur MF, Malouin F, Richards C, Doyon J. Potential role of mental practice using motor imagery in neurologic rehabilitation. *Arch Phys Med Rehabil*. 2001;82(8):1133-41.
108. di Pellegrino G, Fadiga L, Fogassi L, Gallese V, Rizzolatti G. Understanding motor events: a neurophysiological study. *Exp Brain Res*. 1992;91:176-80.
109. Rizzolatti G, Craighero L. The mirror-neuron system. *Annu Rev Neurosci*. 2004;27:169-92.
110. Mellet E, Petit L, Mazoyer B, Denis M, Tzourio N. Reopening the mental imagery debate: lessons from functional anatomy. *Neuroimage*. 1998;8(2):129-39.
111. Kleynen M, Braun SM, Bleijlevens MH, et al. Using a Delphi technique to seek consensus regarding definitions, descriptions and classification of terms related to implicit and explicit forms of motor learning. *PloS One*. 2014;9(6):e100227.
112. Agmon M, Belza B, Nguyen HQ, Logsdon RG, Kelly VE. A systematic review of interventions conducted in clinical or community settings to improve dual-task postural control in older adults. *Clin Interv Aging*. 2014;9:477-92.
113. Kleynen M, Wilson MR, Jie L-J, te Lintel Hekkert F, Goodwin VA, Braun SM. Exploring the utility of analogies in motor learning after stroke: a feasibility study. *Int J Rehabil Res*. 2014;37(3):277-80.
114. Jie L-J, Goodwin V, Kleynen M, Braun S, Nunns M, Wilson M. Analogy learning in Parkinson's disease: a proof-of-concept study. *Int J Ther Rehabil*. 2016;23(3):123-30.
115. Ownsworth T, Fleming J, Tate R, et al. Do people with severe traumatic brain injury benefit from making errors? A randomized controlled trial of error-based and errorless learning. *Neurorehabil Neural Repair*. 2017;31(12):1072-82.
116. Lakens D. Sample size justification. *Collabra Psychol*. 2022;8(1):33267.
117. Lohse K, Buchanan T, Miller M. Underpowered and overworked: Problems with data analysis in motor learning studies. *J Mot Learn Dev*. 2016;4(1):37-58.

118. Kal E, Prosée R, Winters M, Van Der Kamp J. Does implicit motor learning lead to greater automatization of motor skills compared to explicit motor learning? A systematic review. *PLoS One*. 2018;13(9):e0203591.
119. Minozzi S, Cinquini M, Gianola S, Gonzalez-Lorenzo M, Banzi R. The revised Cochrane risk of bias tool for randomized trials (RoB 2) showed low interrater reliability and challenges in its application. *J Clin Epidemiol*. 2020;126:37-44.
120. Dobkin BH. Motor rehabilitation after stroke, traumatic brain, and spinal cord injury: common denominators within recent clinical trials. *Curr Opin Neurol*. 2009;22(6):563-9.
121. Tarquinio C, Kivits J, Minary L, Coste J, Alla F. Evaluating complex interventions: perspectives and issues for health behaviour change interventions. *Psychol Health*. 2015;30(1):35-51.
122. Jie L-J, Kleynen M, Meijer K, Beurskens A, Braun S. Implicit and explicit motor learning interventions for gait in people after stroke: a process evaluation of a randomized controlled trial. *medRxiv*. 2020:2020.01. 17.20017897.
123. Salas Apaza JA, Franco JVA, Meza N, Madrid E, Loézar C, Garegnani L. Minimal clinically important difference: The basics. *Medwave*. 2021;21(3).
124. Jette AM. Opening the black box of rehabilitation interventions. *Phys Ther*. 2020;100(6):883-4.

### **List of figure legends**

Figure 1. PRISMA flowchart for the inclusion of studies.

Figure 2. Visualisation of the number of studies identified per learning strategy including the sub-populations covered.

Figure 3. The year of publication per motor learning strategy. The identified motor learning strategies are based on the seven best-known and most-used motor learning strategies as embedded in the framework of Kleynen et al.<sup>11</sup> Data of six motor learning strategies were included, as no studies for discovery learning were identified.

**Figure 1.** PRISMA flowchart for the inclusion of studies

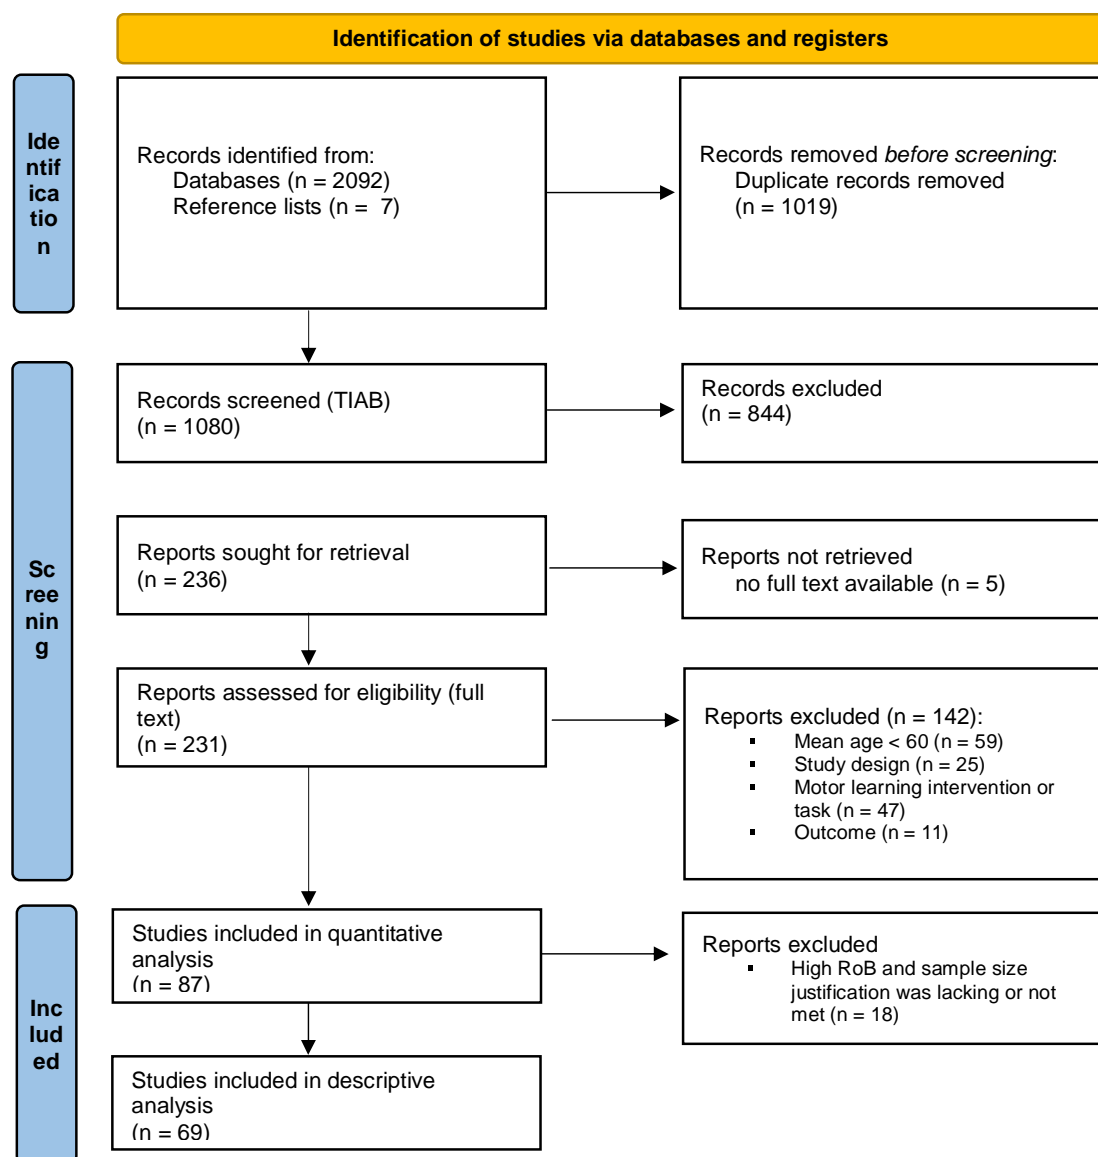





**Figure 3.** The year of publication per motor learning strategy. The identified motor learning strategies are based on the seven best-known and most-used motor learning strategies as embedded in the framework of Kleynen et al.<sup>11</sup> Data of six motor learning strategies were included, as no studies for discovery learning were identified.

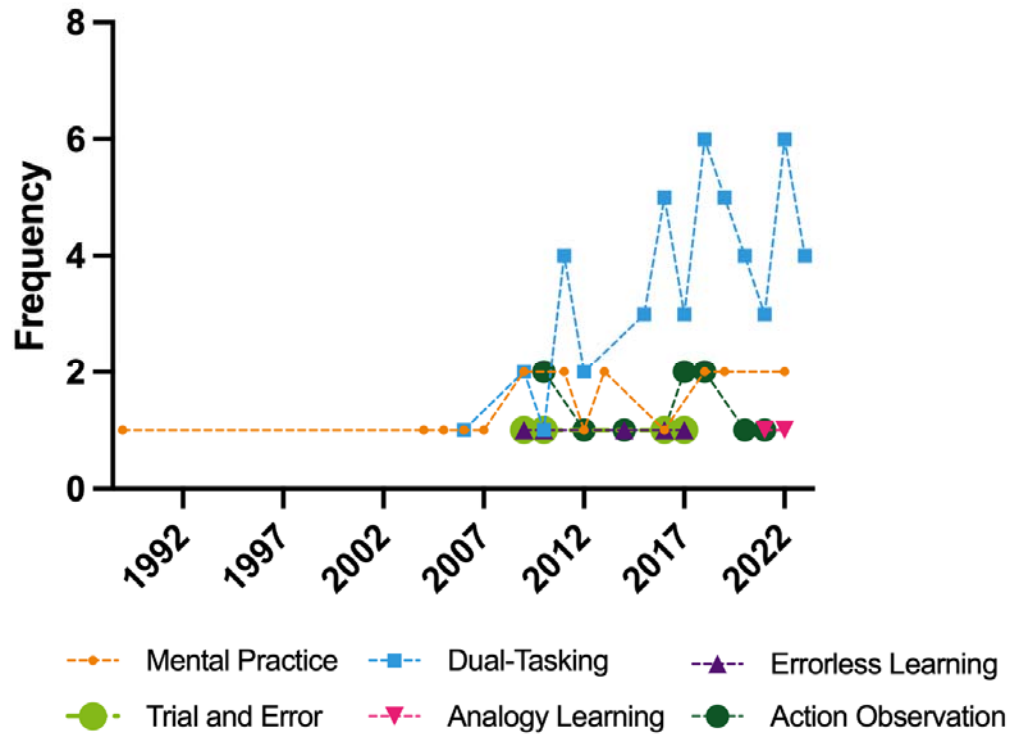

**Table 1.** Overview of selection criteria.

|                      | <b>Inclusion</b>                                                                                                                                     | <b>Exclusion</b>                                                                                                                                                       |
|----------------------|------------------------------------------------------------------------------------------------------------------------------------------------------|------------------------------------------------------------------------------------------------------------------------------------------------------------------------|
| <b>Population</b>    | Mean $\geq$ 60 years                                                                                                                                 | Mean age < 60 years                                                                                                                                                    |
| <b>Intervention</b>  | Errorless learning, analogy learning, observational learning, trial-and-error learning, dual-task learning, discovery learning, and mental imagery   | Multimodal training interventions to ensure training effects are due to one of the seven interventions rather than other training modalities or combined interventions |
|                      | $\geq$ 1 training session                                                                                                                            | < 1 training session                                                                                                                                                   |
| <b>Outcome</b>       | Physical movement performance outcome assessed immediately after the intervention (acquisition) and/or at a delayed time point (retention/ transfer) | No motor performance outcome was measured, e.g. only magnetic resonance imaging or electroencephalogram. No serial reaction time outcomes                              |
| <b>Study Design</b>  | Randomised controlled trial                                                                                                                          | Any other non-randomised trial design                                                                                                                                  |
| <b>Language</b>      | English, German, or Dutch                                                                                                                            | -                                                                                                                                                                      |
| <b>Accessibility</b> | -                                                                                                                                                    | No full text available                                                                                                                                                 |

**Table 2.** Risk of bias scores, power, group size, task, and overall outcome of the included studies

| Reference                         | Population                            | Overall RoB2 | Power | Group size | Task <sup>1</sup>         | Difference between groups |                             |
|-----------------------------------|---------------------------------------|--------------|-------|------------|---------------------------|---------------------------|-----------------------------|
| <b>Analogy learning</b>           |                                       |              |       |            |                           |                           |                             |
| Stroke                            | Jie et al., 2021                      |              |       | N = 79     | Walking                   | Post: NS                  | Follow-up: NS               |
| Older adults with risk of falling | Mak et al., 2022                      |              |       | N = 56     | Walking                   | Post: NS                  | Follow-up: NS               |
| <b>Errorless learning</b>         |                                       |              |       |            |                           |                           |                             |
| Orthopaedic                       | Donaghey et al., 2010                 |              |       | N = 30     | Arm-hand function ability | Post: S (2/5 outcomes)    | Follow-up: NA               |
| Alzheimer's                       | Bourgeois et al., 2016                |              |       | N = 74     | ADL                       | Post: NS                  | Follow-up: NS               |
|                                   | Thivierge et al., 2014                |              |       | N = 17     | ADL                       | Post: NS                  | Follow-up: NS               |
|                                   | Kessels et al., 2009                  |              |       | N = 60     | Arm-hand function ability | Post: S (1/1 outcome)     | Follow-up: S (1/1 outcome)  |
|                                   | Voigt-Radloff et al., 2017            |              |       | N = 161    | ADL                       | Post: NS                  | Follow-up: NS               |
| <b>Mental practice</b>            |                                       |              |       |            |                           |                           |                             |
| Parkinson's                       | Braun et al., 2011                    |              |       | N = 47     | Walking and sit-to-stand  | Post: NS                  | Follow-up: NS               |
|                                   | Silva et al., 2019                    |              |       | N = 18     | Walking and balance       | Post: NS                  | Follow-up: NA               |
|                                   | El-wishy et al., 2013                 |              |       | N = 26     | Walking                   | Post: S (6/6 outcomes)    | Follow-up: NA               |
|                                   | Marques de Melo Santiago et al., 2015 |              |       | N = 20     | Walking                   | Post: NS                  | Follow-up: NS               |
|                                   | Monteiro et al., 2018                 |              |       | N = 14     | Mobility and balance      | Post: S (3/3 outcomes)    | Follow-up: NA               |
| Older adults                      | Batson et al., 2007                   |              |       | N = 6      | Dynamic exercises         | Post: NS                  | Follow-up: NA               |
|                                   | Linden et al., 1989                   |              |       | N = 23     | Walking balance           | Post: NS                  | Follow-up: NA               |
|                                   | Nicholson et al., 2018                |              |       | N = 30     | Walking (obstacle course) | Post: NS                  | Follow-up: NA               |
| Orthopaedic                       | Korbus & Schott., 2022                |              |       | N = 29     | Wrist movements           | Post: NS                  | Follow-up: NA               |
|                                   | Paravlic et al., 2019                 |              |       | N = 34     | Knee extension            | Post: S (8/11 outcomes)   | Follow-up: NA               |
| Stroke                            | Braun et al., 2012                    |              |       | N = 36     | Multiple functional tasks | Post: NS                  | Follow-up: NS               |
|                                   | Dickstein et al., 2013                |              |       | N = 23     | Walking                   | Post: NR                  | Follow-up: NR               |
|                                   | Guerra et al., 2022                   |              |       | N = 16     | Walking, standing up      | Post: NS                  | Follow-up: NA               |
|                                   | Ietswaart et al., 2011                |              |       | N = 121    | Upper limb activities     | Post: NS                  | Follow-up: NA               |
|                                   | Liu et al., 2004                      |              |       | N = 46     | ADL tasks                 | Post: S (3/5 outcomes)    | Follow-up: S (1/1 outcomes) |

|                               |                                |   |   |         |                                         |                          |                                                                  |
|-------------------------------|--------------------------------|---|---|---------|-----------------------------------------|--------------------------|------------------------------------------------------------------|
|                               | Liu et al., 2009               | ! | - | N = 35  | ADL tasks                               | Post: S (5/8 outcomes)   | Follow-up: NA                                                    |
|                               | Malouin et al., 2009           | ! | - | N = 12  | Standing up and sitting down            | Post: S (2/2 outcomes)   | Follow-up: NS                                                    |
|                               | Page et al., 2005              | ! | - | N = 11  | Upper limb activities of daily living   | Post: S (1/2 outcomes)   | Follow-up: NA                                                    |
|                               | Park et al., 2016              | - | - | N = 30  | Upper limb activities through Wii games | Post: S (3/3 outcomes)   | Follow-up: NA                                                    |
| <b>Observational learning</b> |                                |   |   |         |                                         |                          |                                                                  |
| Orthopaedic                   | Bellelli et al., 2010          | ! | - | N = 60  | Daily actions with the leg or trunk     | Post: S (6/9 outcomes)   | Follow-up: NA                                                    |
|                               | Villafañe et al., 2017         | ! | - | N = 31  | Mobilisation exercises & transfers      | Post: S (3/10 outcomes)  | Follow-up: NA                                                    |
| Parkinson's                   | Agosta et al., 2017            | ! | - | N = 25  | Strategies to circumvent FoG            | Post: S (1/9 outcomes)   | Follow-up: NS                                                    |
|                               | Jaywant et al., 2016           | ! | + | N = 23  | Walking                                 | Post: NS                 | Follow-up: NA                                                    |
|                               | Mezzarobba et al., 2018 & 2020 | ! | + | N = 22  | Strategies to circumvent FoG            | Post: S (5/19 outcomes)  | Follow-up 1: S (8/19 outcomes)<br>Follow-up 2: S (8/19 outcomes) |
|                               | Pelosin et al., 2010           | ! | - | N = 18  | Strategies to circumvent FoG            | Post: NS                 | Follow-up: S (2/6 outcomes)                                      |
|                               | Pelosin et al., 2018           | ! | - | N = 64  | Strategies to circumvent FoG            | Post: NR                 | Follow-up: NR                                                    |
| Stroke                        | Franceschini et al., 2012      | ! | + | N = 102 | Functional upper limb activities        | Post: S (1/7 outcomes)   | Follow-up: S (1/7 outcomes)                                      |
|                               | Sale et al., 2014              | ! | - | N = 67  | Functional upper limb activities        | Post: S (4/6 outcomes)   | Follow-up: S (4/6 outcomes)                                      |
|                               | Mancuso et al., 2021           | ! | - | N = 36  | Functional upper limb activities        | Post: S (1/4 outcomes)   | Follow-up: NA                                                    |
| Older adults                  | Rojasavastera et al., 2020     | ! | + | N = 33  | Walking                                 | Post: S (2/6 outcomes)   | Follow-up: S (2/6)                                               |
| <b>Dual-task learning</b>     |                                |   |   |         |                                         |                          |                                                                  |
| Stroke                        | An et al., 2021                | ! | - | N = 30  | Activities of daily living              | Post: S (1/1 outcomes)   | Follow-up: NA                                                    |
|                               | Fishbein et al., 2019          | ! | - | N = 22  | Gait training                           | Post: NS                 | Follow-up: NA                                                    |
|                               | Meester et al., 2019           | ! | - | N = 50  | Walking                                 | Post: NS                 | Follow-up: NA                                                    |
| Orthopaedic                   | Conradsson & Halvarsson, 2019  | - | + | N = 68  | Balance training programme              | Post: S (10/32 outcomes) | Follow-up: NA                                                    |
|                               | Karagül et al., 2023           | - | - | N = 43  | Balance exercises                       | Post: S (4/10 outcomes)  | Follow-up: NA                                                    |
|                               | Konak et al., 2016             | ! | + | N = 42  | Static and dynamic balance              | Post: S (3/6 outcomes)   | Follow-up: NA                                                    |

|              |                                  |   |   |         |                                 |                                                                     |                                                |
|--------------|----------------------------------|---|---|---------|---------------------------------|---------------------------------------------------------------------|------------------------------------------------|
|              | Uzunkulaoglu et al., 2020        | ! | + | N = 50  | Balance training programme      | Post: NS                                                            | Follow-up: NA                                  |
|              | Vaillant et al., 2006            | - | - | N = 56  | Walking and balancing           | Post: S (1/4 outcomes)                                              | Follow-up: S (1/4 outcomes)                    |
| Dementia     | Chen et al., 2018                | ! | - | N = 28  | Walking                         | Post: NS                                                            | Follow-up: NS                                  |
|              | Ghadiri et al., 2022             | ! | + | N = 38  | Walking and manipulative skills | Post: S (2/9 outcomes) <sup>3</sup>                                 | Follow-up: S (2/9 outcomes) <sup>3</sup>       |
|              | Lemke et al., 2018               | + | - | N = 105 | Walking and balance             | Post: S (25/55 outcomes)                                            | Follow-up: S (10/55 outcomes)                  |
|              | Menengic et al., 2022            | ! | + | N = 20  | Simple chair-based exercises    | Post: S (4/6 outcomes)                                              | Follow-up: NA                                  |
|              | Schwenk et al., 2010             | ! | - | N = 61  | Walking and balance             | Post: S (1/2 outcomes)                                              | Follow-up: NA                                  |
|              |                                  |   |   |         |                                 |                                                                     |                                                |
| Parkinson's  | Fernandes et al., 2015           | ! | - | N = 15  | Balance training                | Post: S (2/5 outcomes)                                              | Follow-up: NA                                  |
|              | Geroin et al., 2018              | + | + | N = 121 | Gait and functional training    | Post: S (14/26 outcomes)                                            | Follow-up: S (14/26 outcomes)                  |
|              | Jaggi et al., 2023               | ! | + | N = 40  | Balance and coordination        | Post: NS                                                            | Follow-up: NA                                  |
|              | Park et al., 2021                | - | - | N = 12  | Drumming                        | Post: S (1/13 outcomes)                                             | Follow-up: NA                                  |
|              | Silva et al., 2019, 2023         | ! | - | N = 25  | Aquatic exercise                | Post: S (4/6 outcomes), NR (2/6 outcomes)                           | Follow-up: S (4/6 outcomes), NR (2/6 outcomes) |
|              | do Nascimento Silva et al., 2021 | - | - | N = 10  | Gait and balance training       | Post: NS                                                            | Follow-up: NA                                  |
|              | Valenzuela et al., 2020          | ! | + | N = 40  | Gait training                   | Post: S (11/20 outcomes)                                            | Follow-up: Post: S (11/23 outcomes)            |
|              | Yang et al., 2019                | ! | + | N = 18  | Gait training                   | Post: S (2/21 outcomes)                                             | Follow-up: NA                                  |
|              |                                  |   |   |         |                                 |                                                                     |                                                |
| Older adults | Brustio et al., 2017             | ! | + | N = 60  | Balance and walking             | Post: NS                                                            | Follow-up: NA                                  |
|              | Pessoa et al., 2020              | ! | - | N = 30  | Walking and balance exercises   | Post: S (3/6 outcomes)                                              | Follow-up: NA                                  |
|              | Gregory et al., 2016             | ! | + | N = 44  | Aerobic exercises               | Post: S (3/6 outcomes)                                              | Follow-up: S (3/6 outcomes)                    |
|              | Hiyamizu et al., 2012            | ! | - | N = 36  | Strength and balance training   | Post: NS                                                            | Follow-up: NA                                  |
|              | Javadpour et al., 2022           | + | + | N = 69  | Balance training                | Post E1 vs C: S (10/10 outcomes)<br>Post E2 vs C: S (9/10 outcomes) | Follow-up: NA                                  |
|              | Kitazawa et al., 2015            | ! | - | N = 60  | Step exercise programme         | Post: NS                                                            | Follow-up: NA                                  |
|              | Castillo de Lima et al., 2023    | - | - | N = 16  | Agility training                | Post: NS                                                            | Follow-up: NA                                  |
|              | Nascimento et al., 2023          | ! | + | N = 44  | Walking and balancing           | Post: NR                                                            | Follow-up: NA                                  |

|                                         |                              |  |  |         |                              |                                                                              |                                         |
|-----------------------------------------|------------------------------|--|--|---------|------------------------------|------------------------------------------------------------------------------|-----------------------------------------|
|                                         | Nematollahi et al., 2016     |  |  | N = 44  | Balancing                    | Post: NS                                                                     | Follow-up: NA                           |
|                                         | Norouzi et al., 2019         |  |  | N = 60  | Resistance training          | Post E1 vs E2 & C: S (1/1 outcome)                                           | Follow up E1 vs E2 & C: S (1/1 outcome) |
|                                         | Plummer-D'Amato et al., 2012 |  |  | N = 17  | Walking and balancing        | Post: NS                                                                     | Follow-up: NA                           |
|                                         | Raichlen et al., 2020        |  |  | N = 74  | Stationary biking            | Post: NS                                                                     | Follow-up: NA                           |
|                                         | Sinaei et al., 2016          |  |  | N = 24  | Balance training             | Post: NS                                                                     | Follow-up: NA                           |
|                                         | Tasvuran Horata et al., 2021 |  |  | N = 32  | Walking and balancing        | Post: S (5/8 outcomes)                                                       | Follow-up: NA                           |
|                                         | Trombetti et al., 2011       |  |  | N = 134 | Balance training             | Post: S (8/17 outcomes)                                                      | Follow-up: NA <sup>2</sup>              |
|                                         | Uemura et al., 2012          |  |  | N = 15  | Agility and strength         | Post: NR                                                                     | Follow-up: NA                           |
|                                         | Wollesen et al., 2015        |  |  | N = 38  | Walking and Balancing        | Post: S (7/36 outcomes)                                                      | Follow-up: NA                           |
|                                         | Wollesen et al., 2017A       |  |  | N = 78  | Walking and balancing        | Post: S (8/22 outcomes)                                                      | Follow-up: NA                           |
|                                         | Wollesen et al., 2017B       |  |  | N = 95  | Walking and balancing        | Post: S (3/12 outcomes)                                                      | Follow-up: NA                           |
|                                         | Yamada et al., 2011A         |  |  | N = 84  | DVD group training           | Post: S (1/4 outcomes)                                                       | Follow-up: NA                           |
|                                         | Yamada et al., 2011B         |  |  | N = 53  | DVD group training           | Post: NR                                                                     | Follow-up: NA                           |
|                                         | You et al., 2009             |  |  | N = 13  | Gait training                | Post: NR                                                                     | Follow-up: NA                           |
| Older adults with balance impairments   | Azadian et al., 2016         |  |  | N = 30  | Gait training and balancing  | Post E1 & E2 vs C: S (5/13 outcomes)<br>Post E2 vs E1 & C: S (3/13 outcomes) | Follow-up: NA                           |
|                                         | Khan et al., 2018            |  |  | N = 39  | Balance training             | Post: S (2/4 outcomes) <sup>3</sup>                                          | Follow-up: NA                           |
|                                         | Silsupadol et al., 2009A & B |  |  | N = 21  | Balance training             | Post E1 & E2 vs C: S (2/10 outcome)<br>Post E1 vs E2 & C: S (1/10 outcome)   | Follow-up: NA                           |
| Older adults with history of falls      | Park et al., 2022            |  |  | N = 58  | Walking and balance training | Post: S (2/2 outcomes)                                                       | Follow-up: NA                           |
| Older adults with cognitive impairments | Delbroek et al., 2017        |  |  | N = 20  | BioRescue balance training   | Post: NR                                                                     | Follow-up: NA                           |
|                                         | Kuo et al., 2022             |  |  | N = 30  | Walking                      | Post: E1 & E2 vs C: S (4/20 outcomes)                                        | Follow-up: E2 vs C: S (4/20 outcomes)   |
|                                         | Parial et al., 2023          |  |  | N = 60  | Dancing                      | Post: NR                                                                     | Follow-up: NR                           |

C: control group; ADL: activities of daily living; FoG: Freezing of Gait; S: significant ( $p < 0.05$ ); NS: not significant ( $p > 0.05$ ); NR: not reported; NA: not applicable; <sup>1</sup> task trained in experimental condition; <sup>2</sup> cross-over trial; <sup>3</sup> effects in favour of control group

**Table 3.** Detailed study characteristics of one analogy learning study

| <b>STROKE</b>    |                                                                |                                                                                                                                                                                                                                                                      |                                      |                                                                                                                                                                             |
|------------------|----------------------------------------------------------------|----------------------------------------------------------------------------------------------------------------------------------------------------------------------------------------------------------------------------------------------------------------------|--------------------------------------|-----------------------------------------------------------------------------------------------------------------------------------------------------------------------------|
| <b>Reference</b> | <b>Population</b>                                              | <b>Intervention</b>                                                                                                                                                                                                                                                  | <b>Amount of supervised practice</b> | <b>Measurement instruments, moments, and outcome</b>                                                                                                                        |
| Jie et al., 2021 | N = 79 persons after stroke in chronic phase                   | <u>Task trained in experimental group:</u><br>Walking. The to-be-improved gait parameter was chosen based on the therapist's expertise and the participants' needs.                                                                                                  |                                      | <u>Measurement instrument:</u><br>- 10 Meter Walk Test<br>- Dual Task Costs motor task<br>- Dual Task Costs cognitive task<br>- Modified Dynamic Gait Index                 |
|                  | <u>Analogy learning group:</u><br>n = 38; 64.6 yrs (SD: 9.4)   | A learning environment was created where participants were not (or minimally) aware of the underlying rules of the practised motor skill. Participants received <i>personalised analogy instructions</i> based on their individual walking problems and preferences. | 9 sessions of 30 minutes in 3 weeks  | <u>Measurement moment:</u><br>Pre- and post-intervention and 4-week follow-up<br><br><u>Between-group differences:</u><br>No significant differences in any of the outcomes |
|                  | <u>Explicit learning group:</u><br>n = 41; 67.8 yrs (SD: 11.6) | A learning environment was created so participants were very aware of the learning process. Participants received <i>detailed explicit instructions</i> on how to improve their gait performance.                                                                    | 9 sessions of 30 minutes in 3 weeks  |                                                                                                                                                                             |

*N = number of participants in total, n = number of participants per group, SD = standard deviation, NA = not applicable, NR = not reported*



**Table 4.** Detailed study characteristics of three studies on **errorless learning** and **trial and error**

| <b>ALZHEIMER'S</b>         |                                                                                                                                                                                                                                                              |                                                                                                                                                                                                                                                                                           |                                      |                                                                                                                                                                                                                                                                              |
|----------------------------|--------------------------------------------------------------------------------------------------------------------------------------------------------------------------------------------------------------------------------------------------------------|-------------------------------------------------------------------------------------------------------------------------------------------------------------------------------------------------------------------------------------------------------------------------------------------|--------------------------------------|------------------------------------------------------------------------------------------------------------------------------------------------------------------------------------------------------------------------------------------------------------------------------|
| <b>Reference</b>           | <b>Population</b>                                                                                                                                                                                                                                            | <b>Intervention</b>                                                                                                                                                                                                                                                                       | <b>Amount of supervised practice</b> | <b>Measurement instruments, moments, and outcome</b>                                                                                                                                                                                                                         |
| Kessels et al., 2009       | N = 60 persons with mild-to-moderate, severe dementia, or no dementia                                                                                                                                                                                        | <u>Task trained in experimental group:</u><br>Functional arm-hand tasks, e.g. removing a cork from a tube.                                                                                                                                                                                |                                      | <u>Measurement instruments:</u><br>- Behavioural Assessment of the Dysexecutive Syndrome (BADS)                                                                                                                                                                              |
|                            | <u>Errorless learning group:</u><br><i>Group 1 – severe dementia</i><br>n = 10; 83.6 yrs (SD: 8.1)<br><i>Group 2 – mild-to-moderate dementia</i><br>n = 10; 76.5 yrs (SD: 7.9)<br><i>Group 3 – controls: no dementia</i><br>n = 10; 72.7 yrs (SD: 11.0)      | To prevent errors, participants received cues before completing a sequence of the to-be-completed task (e.g. 'You can use the hook to remove the lid').                                                                                                                                   | 1 session (duration of session NR)   | <u>Measurement moments:</u><br>Pre- and post-intervention and 1-3 days follow-up<br><br><u>Between-group differences:</u><br>Difference in task performance on the BADS in favour of the errorless learning groups in persons with severe, mild-to-moderate, or no dementia. |
|                            | <u>Trial-and-error learning group:</u><br><i>Group 1 – severe dementia</i><br>n = 10; 83.2 yrs (SD: 7.1)<br><i>Group 2 – mild-to-moderate dementia</i><br>n = 10; 77.1 yrs (SD: 9.4)<br><i>Group 3 – controls: no dementia</i><br>n = 10; 71.9 yrs (SD: 8.9) | Initially, cues were <u>not</u> provided to complete the task. Cues were only provided (in the second instance) if they were unable to find and complete the correct next step, i.e. errors were made.                                                                                    | 1 session (duration of session NR)   |                                                                                                                                                                                                                                                                              |
| Voigt-Radloff et al., 2017 | N = 161 persons with Alzheimer's or mixed-type dementia                                                                                                                                                                                                      | <u>Task trained in experimental group:</u> By shared decision-making, participants practised two tasks relevant to daily living.                                                                                                                                                          |                                      | <u>Measurement instruments:</u><br>Core Elements Method (CEM: a 7-point scale for each task where 1 = not performed at all as trained by the therapist; 7 = performed exactly as trained by the therapist)                                                                   |
|                            | <u>Errorless learning group:</u><br>n = 81; 77.1 yrs (SD: 7.8)                                                                                                                                                                                               | The therapist divided the task into appropriate steps, demonstrated and (verbally) guided the participants through the steps. If potential errors occurred, then the therapist anticipated through providing a short demonstration of the correct performance, i.e. errors were prevented | 9 sessions of 60 min in 10 weeks     | <u>Measurement moments:</u><br>Pre- and post-intervention, and 6- and 16-week follow-up<br><br><u>Between-group differences:</u><br>No significant differences in any of the outcomes.                                                                                       |
|                            | <u>Trial-and-error group:</u><br>n = 80; 76.1 yrs (SD: 6.8)                                                                                                                                                                                                  | Participants were asked to perform the task but did not receive instructions or demonstration. After 3 insufficient trials, open-ended questions were asked about the purpose of the task to find solutions.                                                                              | 9 sessions of 60 min in 10 weeks     |                                                                                                                                                                                                                                                                              |

**Table 4 (continued).** Detailed study characteristics of three studies on **errorless learning** and **trial and error**

| <b>ORTHOPAEDICS</b>   |                                                               |                                                                                                                                                                                                                                   |                                                                      |                                                                                                                                                                                                                                                  |
|-----------------------|---------------------------------------------------------------|-----------------------------------------------------------------------------------------------------------------------------------------------------------------------------------------------------------------------------------|----------------------------------------------------------------------|--------------------------------------------------------------------------------------------------------------------------------------------------------------------------------------------------------------------------------------------------|
| <b>Reference</b>      | <b>Population</b>                                             | <b>Intervention</b>                                                                                                                                                                                                               | <b>Amount of supervised practice</b>                                 | <b>Measurement instruments, moments, and outcome</b>                                                                                                                                                                                             |
| Donaghey et al., 2010 | N = 30 persons with unilateral transtibial amputations        | <u>Task trained in experimental group:</u><br>Fitting a prosthetic limb.                                                                                                                                                          | All participants were first shown how to put on the prosthetic limb. | <u>Measurement instruments:</u><br>Video analyses of the final trial included:<br>- Total number of correct steps<br>- Number of omissions<br>- Number of deviations<br>- Number of hesitations<br>- Time taken to complete the fitting sequence |
|                       | <u>Errorless learning group:</u><br>n = 15; 62 yrs (SD: 14.6) | The participants were 'talked through' the sequence of tasks, such that they were unable to make any errors. Participants received the appropriate limb parts needed to move correctly to the next stage of the fitting sequence. | 1 session of 15-30 min                                               | <u>Measurement moments:</u><br>Post-intervention                                                                                                                                                                                                 |
|                       | <u>Trial-and-error group:</u><br>n = 15; 66 yrs (SD: 6.8)     | Learning proceeded via a trial-and-error process.                                                                                                                                                                                 | 1 session of 15-30 min                                               | <u>Between-group differences:</u><br>Difference in correct steps in the fitting sequence and number of errors in favour of the errorless learning group                                                                                          |

*N = number of participants in total, n = number of participants per group, SD = standard deviation, NA = not applicable, NR = not reported, BADS = Behavioural Assessment of the Dysexecutive Syndrome,*

**Table 5.** Detailed study characteristics of 11 studies on **mental practice**

| <b>PARKINSON'S</b>    |                                                                        |                                                                                                                                                                                                                                                                                                                                                                                               |                                                            |                                                                                                                                                                                                                                                                                   |
|-----------------------|------------------------------------------------------------------------|-----------------------------------------------------------------------------------------------------------------------------------------------------------------------------------------------------------------------------------------------------------------------------------------------------------------------------------------------------------------------------------------------|------------------------------------------------------------|-----------------------------------------------------------------------------------------------------------------------------------------------------------------------------------------------------------------------------------------------------------------------------------|
| <b>Reference</b>      | <b>Population</b>                                                      | <b>Intervention</b>                                                                                                                                                                                                                                                                                                                                                                           | <b>Amount of supervised practice</b>                       | <b>Measurement instruments, moments, and outcome</b>                                                                                                                                                                                                                              |
| Braun et al., 2011    | N = 47 persons with Parkinson's                                        | <u>Task trained in experimental group:</u> Mobility tasks, e.g. walking and sit-to-stand exercises.                                                                                                                                                                                                                                                                                           |                                                            | <u>Measurement instruments:</u><br>- Visual Analogue Scale on walking performance<br>- Timed Up and Go<br>- 10-Metre Walking Test                                                                                                                                                 |
|                       | <u>Mental practice group:</u><br>n = 25; 70.0 yrs (SD: 8.0)            | Usual care according to national guidelines and embedded mental practice, based on a pre-described 4-phase protocol (individual or group). Unguided mental practice was encouraged.                                                                                                                                                                                                           | 12 sessions of 30 min (or 6 sessions of 60 min) in 6 weeks | <u>Measuring moments:</u><br>Pre- and post-intervention and 1-month follow-up                                                                                                                                                                                                     |
|                       | <u>Control (relaxation) group:</u><br>n = 22; 69.0 yrs (SD: 8.0)       | Usual care according to national guidelines and embedded relaxation therapy, based on the principles of progressive muscle relaxation (individual or group). Unguided relaxation therapy was encouraged.                                                                                                                                                                                      | 12 sessions of 30 min (or 6 sessions of 60 min) in 6 weeks | <u>Between-group differences:</u><br>No significant differences in any of the outcomes.                                                                                                                                                                                           |
| El-wishy et al., 2013 | N = 26 persons with Parkinson's                                        | <u>Task trained in experimental group:</u> Mobility task and gait performance                                                                                                                                                                                                                                                                                                                 |                                                            | <u>Measurement instruments:</u><br>- Gait speed<br>- Step length<br>- Hip excursion<br>- Knee excursion<br>- Ankle excursion<br>- Functional Gait Assessment (FGA)                                                                                                                |
|                       | <u>Locomotor imagery training group:</u><br>n = 13; 71.0 yrs (SD: 4.2) | Protocolised physical therapy and locomotor imagery training. Participants watched 2 videos of a healthy older adult and patient walking (displayed from anterior, posterior, and side views). Motor imagery in accordance with a five-stage protocol: progressive relaxation, external imagery (analysis of task sequences), problem identification, internal imagery, and mental rehearsal. | 12 sessions of 50-70 min in 4 weeks                        | <u>Measuring moments:</u><br>Pre- and post-intervention                                                                                                                                                                                                                           |
|                       | <u>Control (physical therapy) group:</u><br>n = 13; 72.0 yrs (SD: 3.5) | Protocolised physical therapy training programme. Participants watched a documentary television programme on topics related to health for the same period of time.                                                                                                                                                                                                                            | 12 sessions of 50-70 min in 4 weeks                        | <u>Between-group differences:</u><br>Differences in gait speed and stride length in favour of the locomotor imagery training group. The ankle, knee, and hip excursions were larger in the imagery training group. Difference on the FGA in favour of the imagery training group. |

**Table 5.** Detailed study characteristics of 11 studies on **mental practice** (continued)

| <b>ORTHOPAEDICS</b>   |                                                                    |                                                                                                                                                                                                                                                                                                                                      |                                                                                                       |                                                                                                                                                                                                                                                                                                                                                                                                                                                                                                                                                                                                                                                                                                                           |
|-----------------------|--------------------------------------------------------------------|--------------------------------------------------------------------------------------------------------------------------------------------------------------------------------------------------------------------------------------------------------------------------------------------------------------------------------------|-------------------------------------------------------------------------------------------------------|---------------------------------------------------------------------------------------------------------------------------------------------------------------------------------------------------------------------------------------------------------------------------------------------------------------------------------------------------------------------------------------------------------------------------------------------------------------------------------------------------------------------------------------------------------------------------------------------------------------------------------------------------------------------------------------------------------------------------|
| <b>Reference</b>      | <b>Population</b>                                                  | <b>Intervention</b>                                                                                                                                                                                                                                                                                                                  | <b>Amount of supervised practice</b>                                                                  | <b>Measurement instruments, moments, and outcome</b>                                                                                                                                                                                                                                                                                                                                                                                                                                                                                                                                                                                                                                                                      |
| Paravlic et al., 2019 | N = 34 persons after knee arthroplasty                             | <i>Task trained in experimental group:</i> maximal voluntary isometric knee extension contraction.                                                                                                                                                                                                                                   | Daily 45-minute continuous passive-motion session and various functional everyday movement exercises. | <u>Measurement instruments:</u><br>- Maximal isometric knee extension strength<br>- 30-second chair stand test<br>- Self-selected gait speed<br>- Self-selected gait speed DT<br>- Brisk-paced gait speed<br>- Brisk-paced gait speed DT<br>- Single support period<br>- Double support period<br>- Stride length<br>- Cadence<br>- Self-reported physical function<br><br><u>Measuring moments:</u><br>Pre- and post-intervention<br><br><u>Between-group differences:</u><br>Differences in maximal isometric knee extension strength, sit-to-stand performance, self-selected gait speed (in single- and dual-task conditions), and brisk-paced gait speed (in single- and dual-task conditions) in favour of the Mlp. |
|                       | <u>Movement imagery group (Mlp):</u><br>n = 17; 62.2 yrs (SD: 4.9) | Routine physical therapy plus movement imagery. MI was practised both during hospitalisation and at home. During the hospitalisation period, participants had been advised to imagine maximal voluntary isometric contractions. After discharge, at home, the MI was supported by an audio description (mp3 file) of the MI session. | 20 sessions of 9 min in 4 weeks                                                                       |                                                                                                                                                                                                                                                                                                                                                                                                                                                                                                                                                                                                                                                                                                                           |
|                       | <u>Control group:</u><br>n = 17; 60.0 yrs (SD: 5.7)                | Routine physical therapy (no MI).                                                                                                                                                                                                                                                                                                    | NA                                                                                                    |                                                                                                                                                                                                                                                                                                                                                                                                                                                                                                                                                                                                                                                                                                                           |

**Table 5.** Detailed study characteristics of 11 studies on **mental practice** (continued)

| <b>STROKE</b>          |                                                                        |                                                                                                                                                          |                                                                                             |                                                                                                                                                                                                                                                                                                                                                                                             |
|------------------------|------------------------------------------------------------------------|----------------------------------------------------------------------------------------------------------------------------------------------------------|---------------------------------------------------------------------------------------------|---------------------------------------------------------------------------------------------------------------------------------------------------------------------------------------------------------------------------------------------------------------------------------------------------------------------------------------------------------------------------------------------|
| <b>Reference</b>       | <b>Population</b>                                                      | <b>Intervention</b>                                                                                                                                      | <b>Amount of supervised practice</b>                                                        | <b>Measurement instruments, moments, and outcome</b>                                                                                                                                                                                                                                                                                                                                        |
| Braun et al., 2012     | N = 36 persons after stroke in the subacute phase                      | <u>Task trained in experimental group:</u><br>Functional tasks: walking, one self-chosen arm activity and one leg activity.                              | Multi-professional rehabilitation for 6 weeks.                                              | <u>Measurement instruments:</u><br>- Numeric Rating Scale<br>- Rivermead Mobility Index<br>- Barthel Index<br>- Berg Balance Scale<br>- Motricity Index<br>- Nine-Hole Peg Test<br>- 10-Metre Walking Test<br><br><u>Measuring moments:</u><br>Pre- and post-intervention, 6-month follow-up<br><br><u>Between-group differences:</u><br>No significant differences in any of the outcomes. |
|                        | <u>Mental practice intervention:</u><br>n = 18; 77.7 yrs (SD: 7.2)     | Mental practice based on a 4-stage framework embedded in therapy as usual. Participants were encouraged to practice unguided imagery training.           | In some patients, between 10-20 minutes were added to the regular rehabilitation programme. |                                                                                                                                                                                                                                                                                                                                                                                             |
|                        | <u>Control group:</u><br>n = 18; 77.9 yrs (SD: 7.4)                    | Therapy as usual, and participants were encouraged to practice physically (unguided).                                                                    | NR                                                                                          |                                                                                                                                                                                                                                                                                                                                                                                             |
| Dickstein et al., 2013 | N = 23 persons after stroke in the chronic phase                       | <u>Task:</u> Walking tasks based on patients' goals.                                                                                                     |                                                                                             | <u>Measurement instruments:</u><br>- 10-Metre Walking Test<br>- Falls-Efficacy Scale<br>- Step activity monitor<br>- Maximal activity (number of steps taken/min during the most active hour of the day)<br><br><u>Measuring moments:</u><br>Pre- and post-intervention, 2-week follow-up<br><br><u>Between-group differences:</u><br>No significant differences in any of the outcomes.    |
|                        | <u>Integrated motor imagery:</u><br>n = 12, 71.3 yrs (SD: NR)          | Individual integrated motor imagery with three standardised imagery scripts (one/week) combining kinesthetics, visual imagery, and motivational imagery. | 12 sessions of 15 min in 4 weeks                                                            |                                                                                                                                                                                                                                                                                                                                                                                             |
|                        | <u>Control group (before cross-over):</u><br>n = 11, 72.2 yrs (SD: NR) | Physical therapy for the affected upper extremity with three standardised types of exercises (one/week).                                                 | 12 sessions of 15 min in 4 weeks                                                            |                                                                                                                                                                                                                                                                                                                                                                                             |

**Table 5.** Detailed study characteristics of 11 studies on **mental practice** (continued)

| <b>STROKE</b>          |                                                                       |                                                                                                                                                                       |                                                                                     |                                                                                                                                                                                                                                                                                                                                                                                                                                                                                                                            |
|------------------------|-----------------------------------------------------------------------|-----------------------------------------------------------------------------------------------------------------------------------------------------------------------|-------------------------------------------------------------------------------------|----------------------------------------------------------------------------------------------------------------------------------------------------------------------------------------------------------------------------------------------------------------------------------------------------------------------------------------------------------------------------------------------------------------------------------------------------------------------------------------------------------------------------|
| <b>Reference</b>       | <b>Population</b>                                                     | <b>Intervention</b>                                                                                                                                                   | <b>Amount of supervised practice</b>                                                | <b>Measurement instruments, moments, and outcome</b>                                                                                                                                                                                                                                                                                                                                                                                                                                                                       |
| Guerra et al., 2022    | N = 16 persons after stroke in the subacute phase                     | <u>Task trained in experimental group:</u> standing up from a chair and walking.                                                                                      | Sessions within both groups were followed by a physical practice session of 40 min. | <u>Measurement instruments:</u><br>- Timed Up and Go Test<br>- Gait speed<br>- Timed Up and Go Test – Assessment of Biomechanical Strategies<br>- Muscle strength<br>- Hip abduction (left and right)<br>- Hip flexion and extension (left and right)<br>- Knee flexion and extension (left and right)<br>- Ankle dorsi- and plantarflexion (left and right)<br><br><u>Measuring moments:</u><br>Pre- and post-intervention<br><br><u>Between-group differences:</u><br>No significant differences in any of the outcomes. |
|                        | <u>Mental practice group:</u><br>n = 8; 61.5 yrs (range 59.5-65.5)    | Mental practice based on a 5-stage protocol: physical practice, familiarisation with kinematic components, memorisation, relaxation, and mental practice.             | 12 sessions of 30 min in 4 weeks                                                    |                                                                                                                                                                                                                                                                                                                                                                                                                                                                                                                            |
|                        | <u>Cognitive training group:</u><br>n = 8; 66.5 yrs (range 57.0-74.5) | Cognitive exercise related to memorising, naming, and reasoning activities.                                                                                           | 12 sessions of 30 min in 4 weeks                                                    |                                                                                                                                                                                                                                                                                                                                                                                                                                                                                                                            |
| Ietswaart et al., 2011 | N = 121 persons after stroke (within 6 months post-stroke)            | <u>Task trained in experimental group:</u> A variety of elementary movements, goal-directed movements, and activities of daily living of the upper limb.              | All participants received physical therapy and normal care.                         | <u>Measurement instruments:</u><br>- Action Research Arm Test score<br>- Grip strength<br>- Manual dexterity performance speed<br>- Barthel Index<br>- Functional limitations profile<br><br><u>Measuring moments:</u><br>Pre- and post-intervention<br><br><u>Between-group differences:</u><br>No significant differences in any of the outcomes.                                                                                                                                                                        |
|                        | <u>Motor imagery training:</u><br>n = 41; 69.3 yrs (SD: 10.8)         | Motor imagery according to a standardised protocol which did not allow tasks to be individualised.                                                                    | 12 sessions of 45 min in 4 weeks                                                    |                                                                                                                                                                                                                                                                                                                                                                                                                                                                                                                            |
|                        | <u>Attention-placebo control:</u><br>n = 39; 68.6 yrs (SD: 16.3)      | Training of mental rehearsal unrelated to motor control such as visual imagery of objects. Received the same amount of attention as the motor imagery training group. | 12 sessions of 45 min in 4 weeks                                                    |                                                                                                                                                                                                                                                                                                                                                                                                                                                                                                                            |
|                        | <u>Normal care:</u><br>n = 42; 64.4 yrs (SD: 15.9)                    | Normal care with no additional training.                                                                                                                              | NA                                                                                  |                                                                                                                                                                                                                                                                                                                                                                                                                                                                                                                            |

**Table 5.** Detailed study characteristics of 11 studies on **mental practice** (continued)

| <b>STROKE</b>    |                                                                 |                                                                                                                                                                                                                                            |                                                                                    |                                                                                                                                                                                                                                                                                                                                                                                                                                                                                                                                                                                                                     |
|------------------|-----------------------------------------------------------------|--------------------------------------------------------------------------------------------------------------------------------------------------------------------------------------------------------------------------------------------|------------------------------------------------------------------------------------|---------------------------------------------------------------------------------------------------------------------------------------------------------------------------------------------------------------------------------------------------------------------------------------------------------------------------------------------------------------------------------------------------------------------------------------------------------------------------------------------------------------------------------------------------------------------------------------------------------------------|
| <b>Reference</b> | <b>Population</b>                                               | <b>Intervention</b>                                                                                                                                                                                                                        | <b>Amount of supervised practice</b>                                               | <b>Measurement instruments, moments, and outcome</b>                                                                                                                                                                                                                                                                                                                                                                                                                                                                                                                                                                |
| Liu et al., 2004 | N = 46 people after stroke (average 13.8 days after stroke)     | <i>Task trained in experimental group:</i> ADL tasks incl. household, cooking, and shopping tasks.                                                                                                                                         |                                                                                    | <u>Measurement instruments:</u><br>- Average performance of 5 trained tasks (Week 1)<br>- Average performance of 5 trained tasks (Week 2)<br>- Average performance of 5 trained tasks (Week 3)<br>- Average performance 5 untrained tasks (Week 3)<br>- Average performance of 5 trained tasks (follow-up)<br>- Fugl-Meyer Assessment<br><br><u>Measure moments:</u><br>Pre- and post-intervention, 1-month follow-up<br><br><u>Between-group differences:</u><br>Differences in performance assessments of the trained and untrained tasks in favour of the mental imagery group at Week 2, Week 3, and follow-up. |
|                  | <u>Mental imagery:</u><br>n = 26; 71.0 yrs (SD: 6.0)            | Mental imagery-based intervention according to a 9-step protocol (task analysis, problem identification, task performance) guided by a computer program.                                                                                   | 15 sessions of 60 min in 3 weeks                                                   |                                                                                                                                                                                                                                                                                                                                                                                                                                                                                                                                                                                                                     |
|                  | <u>Functional retraining:</u><br>n = 20; 72.7 yrs (SD: 9.4)     | A functional retraining programme with a demonstration, then practice. Patients were required to practise the same tasks following a sequence and training schedule similar to that of the mental imagery programme.                       | 15 sessions of 60 min in 3 weeks                                                   |                                                                                                                                                                                                                                                                                                                                                                                                                                                                                                                                                                                                                     |
| Liu et al., 2009 | N = 33 persons in the acute phase of recovery                   | <i>Task trained in experimental group:</i> ADL tasks incl. household, cooking, and shopping tasks.                                                                                                                                         | 1-hour daily physical therapy – mobilisation, strengthening, and walking exercises | <u>Measurement instruments:</u><br>- Performance of 5 trained ADL tasks<br>- Performance of 3 untrained ADL tasks<br><br><u>Measure moments:</u><br>Pre- and post-intervention<br><br><u>Between-group differences:</u><br>Differences were for 3 trained tasks (fry vegetables with meat, tidy table after meal, and go to park) and two untrained tasks (clean refrigerator, go to resource centre) in favour of the intervention group.                                                                                                                                                                          |
|                  | <u>Mental imagery:</u><br>n = 16; 70.8 yrs (SD: 9.3)            | Mental imagery programme including truncating the task (chunking), self-reflecting on deficits in performing it, feedback (using video playback), mentally rehearsing as if performing it (rehearsal), and actually carrying the task out. | 15 sessions of 60 min in 3 weeks                                                   |                                                                                                                                                                                                                                                                                                                                                                                                                                                                                                                                                                                                                     |
|                  | <u>Functional rehabilitation:</u><br>n = 17; 69.7 yrs (SD: 7.4) | Conventional occupational therapy involving the demonstration and practice of the task under supervision.                                                                                                                                  | 15 sessions of 60 min in 3 weeks                                                   |                                                                                                                                                                                                                                                                                                                                                                                                                                                                                                                                                                                                                     |

**Table 5.** Detailed study characteristics of 11 studies on **mental practice** (continued)

| <b>STROKE</b>        |                                                                               |                                                                                                                                                                                                         |                                                                                                  |                                                                                                                                                                                                                                                                  |
|----------------------|-------------------------------------------------------------------------------|---------------------------------------------------------------------------------------------------------------------------------------------------------------------------------------------------------|--------------------------------------------------------------------------------------------------|------------------------------------------------------------------------------------------------------------------------------------------------------------------------------------------------------------------------------------------------------------------|
| <b>Reference</b>     | <b>Population</b>                                                             | <b>Intervention</b>                                                                                                                                                                                     | <b>Amount of supervised practice</b>                                                             | <b>Measurement instruments, moments, and outcome</b>                                                                                                                                                                                                             |
| Malouin et al., 2009 | N = 12 persons after stroke in the chronic phase                              | <u>Task trained in experimental group:</u> Standing up from a chair and sitting down.                                                                                                                   |                                                                                                  | <u>Measurement instruments:</u><br>- Loading of the affected leg whilst rising.<br>- Loading of the affected leg when sitting down.                                                                                                                              |
|                      | <u>Mental practice + physical practice:</u><br>n = 5; 61.3 yrs (SD: 7.2)      | A combination of mental practice with physical repetitions including preparation, instructions, mental repetitions, auto-estimation of motor imagery vividness, physical repetitions, and rest periods. | 12 sessions of 60 min in 4 weeks                                                                 | <u>Measuring moments:</u><br>Pre- and post-intervention, 3-week follow-up                                                                                                                                                                                        |
|                      | <u>Cognitive practice + physical practice:</u><br>n = 3; 61.0 yrs (SD: 8.5)   | A combination of cognitive training (e.g. mental calculation, recall of numbers, questions about sports) with physical repetitions and rest periods.                                                    | 12 sessions of 60 min in 4 weeks                                                                 | <u>Between-group differences:</u><br>Differences in limb loading whilst both standing up and sitting down in favour of the mental practice group post-intervention. No difference was found between the cognitive practice group and the group without training. |
|                      | <u>No training:</u><br>n = 4; 61.8 yrs (SD: 9.5)                              | No training.                                                                                                                                                                                            | NA                                                                                               |                                                                                                                                                                                                                                                                  |
| Page et al., 2005    | N = 11 persons after stroke in the chronic phase; 62.3 yrs (range, 53-71 yrs) | <u>Task trained in experimental group:</u> Functional movements of ADLs using affected arm, standardised for all patients of the experimental group.                                                    | All participants received therapy for the more affected arm for 12 sessions of 30 min in 6 weeks | <u>Measurement instruments:</u><br>- Motor Activity Log<br>- Action Research Arm Test                                                                                                                                                                            |
|                      | <u>Mental practice group:</u><br>n = 6; (SD: NR)                              | Participants followed a pre-recorded audio mental practice intervention (audiotape) including relaxation, mental practice, and refocusing.                                                              | 12 sessions of 30 min in 6 weeks                                                                 | <u>Measuring moments:</u><br>Pre- and post-intervention                                                                                                                                                                                                          |
|                      | <u>Control group:</u><br>n = 5; (SD: NR)                                      | Participants followed relaxation techniques according to a progressive relaxation protocol (audiotape).                                                                                                 | 12 sessions of 30 min in 6 weeks                                                                 | <u>Between-group differences:</u><br>Differences in the Action Research Arm Test were found in favour of the mental practice group.                                                                                                                              |

N = number of participants in total, n = number of participants per group, SD = standard deviation, NA = not applicable, NR = not reported, FGA = Functional Gait Assessment



**Table 6.** Detailed study characteristics of eleven studies on **observational learning**

| Reference              | Population:<br>Orthopaedic                                    | Intervention and task                                                                                                                                                                                                                                            | Amount of supervised practice                                                                       | Measurement instruments, moments, and outcome                                                                                                                                                                                                                                                                                                                                                                                                                                                                                                                                                                                                                                                                                                                                                                                                                  |
|------------------------|---------------------------------------------------------------|------------------------------------------------------------------------------------------------------------------------------------------------------------------------------------------------------------------------------------------------------------------|-----------------------------------------------------------------------------------------------------|----------------------------------------------------------------------------------------------------------------------------------------------------------------------------------------------------------------------------------------------------------------------------------------------------------------------------------------------------------------------------------------------------------------------------------------------------------------------------------------------------------------------------------------------------------------------------------------------------------------------------------------------------------------------------------------------------------------------------------------------------------------------------------------------------------------------------------------------------------------|
| Bellelli et al., 2010  | N = 60 persons after hip fracture or hip or knee replacement  | <u>Task:</u> Daily actions with the leg or trunk.                                                                                                                                                                                                                | Conventional post-orthopaedic rehabilitation programme for 1 hour a day, 6 days a week, for 3 weeks | <u>Measurement instruments:</u><br>- Functional Independence Measure (FIM) at discharge<br>- FIM absolute functional gain (AFG) (change in scores from admission)<br>- FIM absolute functional efficiency (AFG / length of stay) to discharge<br>- FIM relative functional gain (AFG / (maximal possible FIM score – actual admission FIM))<br>- Motor FIM subscore at discharge<br>- Motor FIM subscore AFG<br>- Tinetti at discharge<br>- Tinetti AFG<br>- Use of walking aids<br><br><u>Measurement moments:</u><br>Pre- and post-intervention<br><br><u>Between-group differences:</u><br>Between-group differences were found for the following outcomes in favour of the action observation group: FIM absolute functional gain, absolute functional efficiency, relative functional gain, Motor FIM subscore AFG, Tinetti AFG, and use of walking aids. |
|                        | <u>Action observation group:</u><br>n = 30; 71.9yrs (SD: 8.4) | Participants observed 3 short movies showing an actor performing daily actions with the leg or trunk (e.g. moving lower limbs, walking). Each short movie included 4 different 2-minute actions. After observation, participants performed the observed actions. | 18 sessions of 24 min in 3 weeks                                                                    |                                                                                                                                                                                                                                                                                                                                                                                                                                                                                                                                                                                                                                                                                                                                                                                                                                                                |
|                        | <u>Control group:</u><br>n = 30; 71.8yrs (SD: 6.9)            | Participants observed short movies (for the same time as patients in the case group) showing scenes with no motor content (e.g. geographic documentaries). After observation, participants performed the same actions as in the experimental group.              | 18 sessions of 24 min in 3 weeks                                                                    |                                                                                                                                                                                                                                                                                                                                                                                                                                                                                                                                                                                                                                                                                                                                                                                                                                                                |
| Villafañe et al., 2017 | N=31 persons after primary hip replacement                    | <u>Task:</u> Mobilisation exercises and transfer practice.                                                                                                                                                                                                       | Both groups: Continuous Passive Movements                                                           | <u>Measurement instruments:</u><br>- Pain<br>- Active flexion<br>- Active extension<br>- Passive flexion<br>- Passive extension<br>- Barthel index<br>- Short Form-36 – motor<br>- Short Form-36 – mental<br>- Tinetti scale<br>- Lequesne Index<br><br><u>Measurement moments:</u><br>Pre- and post-intervention<br><br><u>Between-group differences:</u><br>Between-group differences were found for the following outcomes in favour of the action observation group: active flexion and extension and Tinetti.                                                                                                                                                                                                                                                                                                                                             |
|                        | <u>Action observation group:</u><br>n = 14; 70.4 yrs (SD:7.5) | Participants watched a video of the exercise before performing independent exercise.                                                                                                                                                                             | 20 sessions (twice a day) of 30 min in 2 weeks                                                      |                                                                                                                                                                                                                                                                                                                                                                                                                                                                                                                                                                                                                                                                                                                                                                                                                                                                |
|                        | <u>Control group:</u><br>n = 17; 70.1 yrs (SD:7.7)            | Participants watched a video nature scene before performing independent exercise.                                                                                                                                                                                | 20 sessions (twice a day) of 30 min in 2 weeks                                                      |                                                                                                                                                                                                                                                                                                                                                                                                                                                                                                                                                                                                                                                                                                                                                                                                                                                                |

**Table 6.** Detailed study characteristics of eleven studies on **observational learning** (continued)

| Reference          | Population                                                                  | Intervention and task                                                                                                                                                                                                                                  | Amount of supervised practice            | Measurement instruments, moments, and outcome                                                                                                                                                                                                                                                                                                                                                                                                                                                                                                                                                                                                                                                                                                                        |
|--------------------|-----------------------------------------------------------------------------|--------------------------------------------------------------------------------------------------------------------------------------------------------------------------------------------------------------------------------------------------------|------------------------------------------|----------------------------------------------------------------------------------------------------------------------------------------------------------------------------------------------------------------------------------------------------------------------------------------------------------------------------------------------------------------------------------------------------------------------------------------------------------------------------------------------------------------------------------------------------------------------------------------------------------------------------------------------------------------------------------------------------------------------------------------------------------------------|
| Agosta et al 2017  | N = 25 persons with PD                                                      | <u>Task:</u> Strategies useful in circumventing FOG.                                                                                                                                                                                                   |                                          | <u>Measurement instruments:</u><br>- Unified Parkinson's Disease Rating Scale III (1x off, 1x on)<br>- Freezing of Gait Questionnaire<br>- Unified Parkinson's Disease Rating Scale II – FOG (1x off, 1x on)<br>- Parkinson's Disease Questionnaire (PDQ-39)<br>- Berg Balance Scale<br>- 10-Metre Walking Test (1x comfortable, 1x speed)<br><br><u>Measuring moments:</u><br>Pre- and post-intervention, 4-week follow-up<br><br><u>Between-group differences:</u><br>Differences were found on the UPDRS III ON in favour of the AOT intervention.                                                                                                                                                                                                                |
|                    | <u>Action observation training (AOT):</u><br>n = 12; 69.0 yrs (SD: 8.0 yrs) | Participants watched videos of strategies useful in circumventing freezing of gait (FOG) episodes; auditory cues were associated with the movements. Afterwards, patients were asked to imitate the observed actions to the beat of the auditory cues. | 12 sessions of 60 min in 4 weeks         |                                                                                                                                                                                                                                                                                                                                                                                                                                                                                                                                                                                                                                                                                                                                                                      |
|                    | <u>Landscape:</u><br>n = 13; 64.0 yrs (SD: 7.0 yrs)                         | Performance of the same movements/actions used for the AOT group in the same order and amount of time with the same instructions, but video clips of landscapes were shown for the same length of time.                                                | 12 sessions of 60 min in 4 weeks         |                                                                                                                                                                                                                                                                                                                                                                                                                                                                                                                                                                                                                                                                                                                                                                      |
| Jaywant et al 2016 | N = 23 persons with PD                                                      | <u>Task:</u> Watching and judging videos.                                                                                                                                                                                                              |                                          | <u>Measurement instruments:</u><br>Measured in three conditions: straight line, walking with turns, dual-task<br>- Walking speed (m/s)      - Stride frequency (strides/s)<br>- Walking speed variability      - Stride frequency variability<br>- Stride length (m)      - Swing time (% of stride)<br>- Stride length variability      - Swing time % variability<br>- Gait asymmetry<br><br><i>Home walking assessment (accelerometer)</i><br>- Stride frequency<br>- Number of walking periods<br>- Duration of each walking period<br><br>Parkinson's Disease Questionnaire (PDQ-39)<br><br><u>Measuring moments:</u><br>Pre- and post-intervention<br><br><u>Between-group differences:</u><br>No between-group differences were found in any of the outcomes. |
|                    | <u>Gait observation:</u><br>n = 13; 63.7 yrs (SD: 6.2)                      | Participants viewed videos of actors with and without PD who were walking. They judged whether their walking in each video appeared healthy or resembled a PD-like gait pattern.                                                                       | 8 sessions, 1 session per day for 8 days |                                                                                                                                                                                                                                                                                                                                                                                                                                                                                                                                                                                                                                                                                                                                                                      |
|                    | <u>Landscape observation:</u><br>n = 10; 65.8 yrs (SD: 8.7)                 | Participants viewed videos of landscapes with moving water in oceans, rivers, lakes, and waterfalls. Participants judged whether the water was moving 'roughly' or 'calmly'.                                                                           | 8 sessions, 1 session per day for 8 days |                                                                                                                                                                                                                                                                                                                                                                                                                                                                                                                                                                                                                                                                                                                                                                      |

**Table 6.** Detailed study characteristics of eleven studies on **observational learning** (continued)

| Reference                      | Population                                                                 | Intervention and task                                                                                                                                                                                                                                                                                                                                        | Amount of supervised practice                                                                     | Measurement instruments, moments, and outcome                                                                                                                                                                                                                                                                                                                                                                                                                                                                                                                                                                                                                                                                                                                                                                                                                                                                                                                                                                                                                                                                                                                                                                                                                                                                                                                                                                                                                                                          |
|--------------------------------|----------------------------------------------------------------------------|--------------------------------------------------------------------------------------------------------------------------------------------------------------------------------------------------------------------------------------------------------------------------------------------------------------------------------------------------------------|---------------------------------------------------------------------------------------------------|--------------------------------------------------------------------------------------------------------------------------------------------------------------------------------------------------------------------------------------------------------------------------------------------------------------------------------------------------------------------------------------------------------------------------------------------------------------------------------------------------------------------------------------------------------------------------------------------------------------------------------------------------------------------------------------------------------------------------------------------------------------------------------------------------------------------------------------------------------------------------------------------------------------------------------------------------------------------------------------------------------------------------------------------------------------------------------------------------------------------------------------------------------------------------------------------------------------------------------------------------------------------------------------------------------------------------------------------------------------------------------------------------------------------------------------------------------------------------------------------------------|
| Mezzarobba et al., 2018 & 2020 | N = 22 persons with PD                                                     | <u>Task:</u> Gait-related movements to circumvent freezing of gait.                                                                                                                                                                                                                                                                                          | All participants were instructed not to practice further rehabilitation/physiotherapy treatments. | <u>Measurement instruments:</u><br>2018<br>- New Freezing of Gait Questionnaire (NFOGQ)<br>- Unified Parkinson's Disease Rating Scale (UPDRS) II<br>- Unified Parkinson's Disease Rating Scale (UPDRS) III<br>- Modified Parkinson's Activity Scale<br>- Berg Balance Scale (BBS)<br>- 6-min Walking Test<br>- Timed Up and Go<br>- 39-item PD Questionnaire (PDQ39) – mobility<br>- 39-item PD Questionnaire – activities of daily living<br>- 39-item PD Questionnaire – emotional well-being<br>- 39-item PD Questionnaire – stigma<br>- 39-item PD Questionnaire – social support<br>- 39-item PD Questionnaire – cognitions<br>- 39-item PD Questionnaire – communication<br>- 39-item PD Questionnaire – bodily discomfort<br>- 39-item PD Questionnaire – total<br>- Centre of Mass (COM)<br>- Centre of Pressure (COP) – time<br>- Centre of Pressure (COP) – position<br>(all during sit-to-walk task)<br><br><u>Measuring moments:</u><br>Pre- and post-intervention, 4-week and 12-week follow-up<br><br><u>Between-group differences:</u><br><br>Between-group differences were found in favour of the action observation group at all three measurement moments for NFOGQ, UPDRS III, PDQ39 – mobility, and PDQ39 – bodily discomfort. Between-group differences were also found in favour of the action observation group for PDQ39 – total and UPDRS II (4 and 12 weeks), BBS (4 weeks), and the 6-min walking test (12 weeks). Significant differences were found in the COP profiles. |
|                                | <u>Action observation plus sonification:</u><br>n = 12; 74.7 yrs (SD: 5.9) | Action observation plus sonification was applied. Participants watched eight videos with eight different gait-related movements (e.g. weight shifting). Each video was composed of images and sounds (obtained with sonification). Afterwards, patients performed the actions for the same time twice (once without watching and once while watching again). | 16 sessions of 60 min in 8 weeks                                                                  |                                                                                                                                                                                                                                                                                                                                                                                                                                                                                                                                                                                                                                                                                                                                                                                                                                                                                                                                                                                                                                                                                                                                                                                                                                                                                                                                                                                                                                                                                                        |
|                                | <u>Cue control:</u><br>n = 10; 72 yrs (SD: 5.8)                            | The same eight motor gestures were performed also in the cue control group with the same order and amount of time by using attentional strategies (e.g. stripes on the floor on beat of the metronome).                                                                                                                                                      | 16 sessions of 60 min in 8 weeks                                                                  |                                                                                                                                                                                                                                                                                                                                                                                                                                                                                                                                                                                                                                                                                                                                                                                                                                                                                                                                                                                                                                                                                                                                                                                                                                                                                                                                                                                                                                                                                                        |

**Table 6.** Detailed study characteristics of eleven studies on **observational learning** (continued)

| Reference            | Population                                              | Intervention and task                                                                                                                                                                             | Amount of supervised practice    | Measurement instruments, moments, and outcome                                                                                                                                                                                                                                                                                                                                                                                                                                                                                                                                                                         |
|----------------------|---------------------------------------------------------|---------------------------------------------------------------------------------------------------------------------------------------------------------------------------------------------------|----------------------------------|-----------------------------------------------------------------------------------------------------------------------------------------------------------------------------------------------------------------------------------------------------------------------------------------------------------------------------------------------------------------------------------------------------------------------------------------------------------------------------------------------------------------------------------------------------------------------------------------------------------------------|
| Pelosin et al., 2010 | N = 18 persons with PD                                  | <u>Task:</u> Strategies useful in circumventing freezing of gait.                                                                                                                                 |                                  | <u>Measurement instruments:</u><br>- Freezing of Gait Questionnaire (FOG-Q)<br>- Freezing of Gait (FOG) diary (number of FOG episodes, three conditions: start, turn, and obstacle)<br>- Timed Up and Go Test<br>- 10-Metre Walking Test<br>- Tinetti Scale<br>- 39-item PD questionnaire<br><br><u>Measuring moments:</u><br>Pre- and post-intervention, 4-week follow-up<br><br><u>Between-group differences:</u><br>Between-group differences were found in favour of the action observation group for the FOG-Q (at follow-up) and the number of FOG episodes at follow-up (overall and for the start condition). |
|                      | <u>Action observation:</u><br>n = 9; 68.8 (SD: 4.1)     | Participants watched six 6-min video clips twice each showing strategies to prevent FOG. After observation, patients were asked to practice (for the remaining time of the session – 36 minutes). | 12 sessions of 60 min in 4 weeks |                                                                                                                                                                                                                                                                                                                                                                                                                                                                                                                                                                                                                       |
|                      | <u>Landscape observation:</u><br>n = 9; 70.2 (SD: 6.8)  | Participants watched videos with landscape pictures for the same amount of time. They performed the same movement as the experimental group.                                                      | 12 sessions of 60 min in 4 weeks |                                                                                                                                                                                                                                                                                                                                                                                                                                                                                                                                                                                                                       |
| Pelosin et al., 2018 | N = 64 persons with PD                                  | <u>Task:</u> Strategies useful in circumventing freezing of gait (FOG).                                                                                                                           |                                  | <u>Measurement instruments:</u><br>- A new FOG questionnaire<br>- Timed Up and Go Test<br>- 10-Metre Walking Test<br>- Berg Balance Scale<br><br><u>Measuring moments:</u><br>Pre- and post-intervention, 4-weeks follow-up<br><br><u>Between-group differences:</u><br>Between-group differences were not reported.                                                                                                                                                                                                                                                                                                  |
|                      | <u>Action observation:</u><br>n = 32; 70.4 (SD: 4.5)    | Participants watched six 6-min video clips twice each showing strategies to prevent FOG. After observation, patients were asked to practice (for the remaining time of the session – 36 minutes). | 10 sessions of 45 min in 5 weeks |                                                                                                                                                                                                                                                                                                                                                                                                                                                                                                                                                                                                                       |
|                      | <u>Landscape observation:</u><br>n = 32; 72.8 (SD: 3.1) | Participants watched videos with landscape pictures for the same amount of time. They performed the same movement as the experimental group.                                                      | 10 sessions of 45 min in 5 weeks |                                                                                                                                                                                                                                                                                                                                                                                                                                                                                                                                                                                                                       |

**Table 6.** Detailed study characteristics of eleven studies on **observational learning** (continued)

| Reference                 | Population                                                                                      | Intervention and task                                                                                                                                                                                                                            | Amount of supervised practice                                                                                               | Measurement instruments, moments, and outcome                                                                                                                                                                                                                                                                                                                                                                                                                                                               |
|---------------------------|-------------------------------------------------------------------------------------------------|--------------------------------------------------------------------------------------------------------------------------------------------------------------------------------------------------------------------------------------------------|-----------------------------------------------------------------------------------------------------------------------------|-------------------------------------------------------------------------------------------------------------------------------------------------------------------------------------------------------------------------------------------------------------------------------------------------------------------------------------------------------------------------------------------------------------------------------------------------------------------------------------------------------------|
| Franceschini et al., 2012 | N = 102 persons after stroke in the subacute phase                                              | <u>Task:</u> 20 different daily routine tasks carried out with the upper limb (e.g. drinking from a glass, combing hair).                                                                                                                        | All participants underwent inpatient rehabilitation with at least 3 hours/day of physiotherapy.                             | <u>Measurement instruments:</u><br>- Frenchay Arm Test<br>- Fugl-Meyer Test<br>- Box and Block Test<br>- Ashworth Scale – Shoulder<br>- Ashworth Scale – Elbow<br>- Ashworth Scale – Wrist<br>- Functional Independence Measure – Motor Score<br><br><u>Measurement moments:</u><br>Pre- and post-intervention, 4-5 months follow-up<br><br><u>Between-group differences:</u><br>Differences in favour of the action observation group were found on Box and Block Test post-intervention and at follow-up. |
|                           | <u>Effect of action observation:</u><br>n = 53; 67.0 yrs (SD: 12.4)                             | Participants watched a video of one of the 20 tasks and imitated the action under supervision and with verbal feedback and assistance if needed.                                                                                                 | 20 sessions of 2 x 15 min in 4 weeks                                                                                        |                                                                                                                                                                                                                                                                                                                                                                                                                                                                                                             |
|                           | <u>'Sham' observation:</u><br>n = 49; 65.7 yrs (SD: 11.9)                                       | Participants were shown 5 static images displaying objects and executed a cognitive task. They performed limb movements according to a standard sequence, simulating those performed by the EG, involving shoulder and elbow joint mobilisation. | 20 sessions of 2 x 15 min in 4 weeks                                                                                        |                                                                                                                                                                                                                                                                                                                                                                                                                                                                                                             |
| Mancuso et al., 2021      | N = 36 persons with stroke in acute phase                                                       | <u>Task:</u> Functional activities with the upper limbs.<br><br>All participants received conventional therapy with a range of different patient-tailored interventions, not involving AOT or TOT objects.                                       | All subjects underwent rehabilitative treatment for 4 consecutive weeks, 5 days per week. Each session consisted of 60 min. | <u>Measurement instruments:</u><br>- Fugl-Meyer Assessment for Upper Extremity<br>- Box and Block Test<br>- Functional Independence Measure (FIM)<br>- Modified Ashworth Scale<br><br><u>Measurement moments:</u><br>Pre- and post-intervention<br><br><u>Between-group differences:</u><br>Differences in favour of the action observation group were found for the FIM.                                                                                                                                   |
|                           | <u>Action observation training (AOT):</u><br>n = 16; median: 64.5 yrs (IQR: 15.8) (mean/SD: NR) | Participants observed 20 different videos of daily activities carried out with the upper limb and performed the activities afterwards (3 min of observation and 2 min of action performance for 3 motor sequences, repeated twice).              | 20 sessions of 30 min for 4 wks (additional to the rehabilitative treatment)                                                |                                                                                                                                                                                                                                                                                                                                                                                                                                                                                                             |
|                           | <u>Task-oriented training (TOT):</u><br>n = 16; median: 76.5 yrs (IQR: 13.7) (mean/SD: NR)      | Participants performed the same functional activities with the upper limbs, in both unimanual and bimanual modalities, without watching the video beforehand.                                                                                    | 20 sessions of 30 min for 4 wks (additional to the rehabilitative treatment)                                                |                                                                                                                                                                                                                                                                                                                                                                                                                                                                                                             |

**Table 6.** Detailed study characteristics of eleven studies on **observational learning** (continued)

| Reference            | Population                                                                        | Intervention and task                                                                                                                                                  | Amount of supervised practice                                                       | Measurement instruments, moments, and outcome                                                                                                                                                                                                                                                                                                                                                                                                                                                                                                                                                                                                        |
|----------------------|-----------------------------------------------------------------------------------|------------------------------------------------------------------------------------------------------------------------------------------------------------------------|-------------------------------------------------------------------------------------|------------------------------------------------------------------------------------------------------------------------------------------------------------------------------------------------------------------------------------------------------------------------------------------------------------------------------------------------------------------------------------------------------------------------------------------------------------------------------------------------------------------------------------------------------------------------------------------------------------------------------------------------------|
| Sale et al., 2014    | N = 67 persons after stroke in the subacute phase<br>66.5 yrs (SD: 12.7)          | <u>Task:</u> Functional upper limb activities.                                                                                                                         | All subjects underwent in-patient rehabilitation consisting of at least 3 hours/day | <u>Measurement instruments:</u><br>- Fugl-Meyer Test (FMT) – all subjects<br>- Fugl-Meyer Test – right hemiparetic subjects<br>- Fugl-Meyer Test – left hemiparetic subjects<br>- Box and Block Test (BBT)-all subjects<br>- Box and Block Test – right hemiparetic subjects<br>- Box and Block Test – left hemiparetic subjects<br><br><u>Measurement moments:</u><br>Pre- and post-intervention, and 4-5 months follow-up<br><br><u>Between-group differences:</u><br>Between-group differences were found in favour of the action observation group for FM and BBT (post-intervention and follow-up, all subjects and left hemiparetic subjects). |
|                      | <u>Action observation training:</u><br>n = 33; data on age NR                     | Participants watched one of 20 videos with different routine actions carried out with the upper limb and performed the same movement afterwards.                       | 20 sessions of 2x15 mins for 4 weeks                                                |                                                                                                                                                                                                                                                                                                                                                                                                                                                                                                                                                                                                                                                      |
|                      | <u>Control group:</u><br>n = 34; data on age NR                                   | Participants watched static images of objects and performed a cognitive task to keep their attention high. Afterwards, they performed the same movements as in the EC. | 20 sessions of 2x15 mins for 4 weeks                                                |                                                                                                                                                                                                                                                                                                                                                                                                                                                                                                                                                                                                                                                      |
| Rojasav et al., 2020 | N = 33 elderly persons with mild cognitive impairment                             | <u>Task:</u> Walking.                                                                                                                                                  |                                                                                     | <u>Measurement instruments:</u><br>- Gait speed (m/s)<br>- Stride time variability (% coefficient of variation)<br>- Stride length variability (% coefficient of variation)<br>in both single- and dual-task conditions<br><br><u>Measurement moments:</u><br>Pre- and post-intervention, 4 wks follow-up<br><br><u>Between-group differences:</u><br>Between-group differences between the AOGT and CT groups were found in favour of the AOGT group for gait speed during single-task and dual-task conditions post-intervention and at follow-up.                                                                                                 |
|                      | <u>Action observation with gait training (AOGT):</u><br>n = 11; 67.6 yrs (SD:4.6) | Participants watched a video of walking acted out by a normal healthy individual followed by gait training.                                                            | 12 sessions of 65 mins for 4-6 weeks                                                |                                                                                                                                                                                                                                                                                                                                                                                                                                                                                                                                                                                                                                                      |
|                      | <u>Gait training (GT):</u><br>n = 11; 67.5 yrs (SD: 5.6)                          | Participants watched a video of abstract pictures followed by the same gait training as in the experimental group.                                                     | 20 sessions of 15 mins for 4-6 weeks                                                |                                                                                                                                                                                                                                                                                                                                                                                                                                                                                                                                                                                                                                                      |
|                      | <u>Control group (CT):</u><br>n = 11; 65.7 yrs (SD: 2.5)                          | Participants received no training programme but were educated about dementia on the screening day.                                                                     | 1 session                                                                           |                                                                                                                                                                                                                                                                                                                                                                                                                                                                                                                                                                                                                                                      |

*N = number of participants in total, n = number of participants per group, SD = standard deviation, NA = not applicable, NR = not reported, FIM = Functional Independence Measure, AFG = absolute functional gain, FOG = Freezing Of Gait, UPDR = Unified Parkinson's Disease Rating Scale, PDQ = Parkinson's Disease Questionnaire, NFOGQ = New Freezing of Gait Questionnaire, COP = Centre of Pressure, BBS = Berg Balance Scale, FOG-Q = Freezing of Gait Questionnaire, FIM = Functional Independence Measure, FMT = Fugl-Meyer Test, BBT = Box and Block Test, AOGT = Action observation with gait training group, CT = control group*



**Table 7.** Detailed study characteristics of 43 studies on **dual-task learning**

| <b>STROKE</b>         |                                                                              |                                                                                                                                                                                                                                                                                                                                                                                                         |                                                          |                                                                                                                                                                                                        |
|-----------------------|------------------------------------------------------------------------------|---------------------------------------------------------------------------------------------------------------------------------------------------------------------------------------------------------------------------------------------------------------------------------------------------------------------------------------------------------------------------------------------------------|----------------------------------------------------------|--------------------------------------------------------------------------------------------------------------------------------------------------------------------------------------------------------|
| <b>Reference</b>      | <b>Population</b>                                                            | <b>Intervention</b>                                                                                                                                                                                                                                                                                                                                                                                     | <b>Amount of supervised practice</b>                     | <b>Measurement instruments, moments, and outcome</b>                                                                                                                                                   |
| An et al., 2021       | N = 30 persons after stroke in sub-acute phase                               | <u>Task trained in experimental group:</u> Activities of daily living such as climbing stairs, making tea, folding tops or bottoms.                                                                                                                                                                                                                                                                     | All participants received 10 min of occupational therapy | <u>Measurement instruments:</u><br>- Manual Function Test (MFT)                                                                                                                                        |
|                       | <u>Dual-task training group (DTG):</u><br><i>n</i> = 15; 65.2 yrs (SD: 12.2) | The secondary task included: <ul style="list-style-type: none"> <li>• Attention tasks: subtracting or counting numbers, reading words backwards, or simple word games.</li> <li>• Executive function tasks: reacting to a virtual situation, explaining the order of wearing clothes, talking about daily routines, making a shopping list, naming certain categories, e.g. types of drinks.</li> </ul> | 25 sessions of 20 min in 5 weeks                         | <u>Measurement moments:</u><br>Pre- and post-intervention<br><br><u>Between-group differences:</u><br>Differences were found in the MFT in favour of the CT.                                           |
|                       | <u>Single-task training:</u><br><i>n</i> = 15; 65.3 yrs (SD: 12.7)           | Sensory stimulation training (paralysed side), upper extremity muscle strength training, cognitive and perceptual training, and fine motor skill training.                                                                                                                                                                                                                                              | 25 sessions of 20 min in 5 weeks                         |                                                                                                                                                                                                        |
| Fishbein et al., 2019 | N = 22 persons after stroke in chronic phase                                 | <u>Task trained in experimental group:</u> Walking<br>All participants trained on a treadmill.                                                                                                                                                                                                                                                                                                          |                                                          | <u>Measurement instruments:</u><br>- Timed Up and Go Test<br>- 10-Metre Walk Test<br>- Functional Reach Test<br>- Lateral Reach Test<br>- Activity-Specific Balance Confidence<br>- Berg Balance Scale |
|                       | <u>Dual-task walking group:</u><br><i>n</i> = 11; 64.4 yrs (SD: NR)          | Walking while training with three VR games (ballgame, reactive boxing, and cleaning windows).                                                                                                                                                                                                                                                                                                           | 8 sessions of 20 min in 4 weeks                          | <u>Measurement moments:</u><br>Pre- and post-intervention, follow-up                                                                                                                                   |
|                       | <u>Single-task walking group:</u><br><i>n</i> = 11; 66 yrs (SD: NR)          | Participants walked on a treadmill at a set speed.                                                                                                                                                                                                                                                                                                                                                      | 8 sessions of 20 min in 4 weeks                          | <u>Between-group differences:</u><br>No significant differences in any of the outcomes.                                                                                                                |



**Table 7.** Detailed study characteristics of 43 studies on **dual-task learning** (continued)

| <b>STROKE</b>                |                                                                       |                                                                                                                                                                                                                               |                                      |                                                                                                                                                                                                                                                                                                                                                                                                                                                                                                                                                                                                                                            |
|------------------------------|-----------------------------------------------------------------------|-------------------------------------------------------------------------------------------------------------------------------------------------------------------------------------------------------------------------------|--------------------------------------|--------------------------------------------------------------------------------------------------------------------------------------------------------------------------------------------------------------------------------------------------------------------------------------------------------------------------------------------------------------------------------------------------------------------------------------------------------------------------------------------------------------------------------------------------------------------------------------------------------------------------------------------|
| <b>Reference</b>             | <b>Population</b>                                                     | <b>Intervention and Task</b>                                                                                                                                                                                                  | <b>Amount of supervised practice</b> | <b>Measurement instruments, moments, and outcome</b>                                                                                                                                                                                                                                                                                                                                                                                                                                                                                                                                                                                       |
| Meester et al., 2019         | N = 50 persons after stroke in chronic phase                          | <u>Task trained in experimental group:</u> Walking. All participants trained on a treadmill.                                                                                                                                  |                                      | <u>Measurement instruments:</u><br>walking distance was measured under single- and dual-task walking. Step activity was measured with a StepWatch Activity Monitor™:<br>- Walking distance<br>- Dual tasking walking distance change (effect)<br>- Dual tasking walking distance and cognitive responses<br>- Step activity per day<br><br><u>Measurement moments:</u><br>Pre- and post-intervention<br><br><u>Between-group differences:</u><br>No significant differences in any of the outcomes.                                                                                                                                        |
|                              | <u>Dual-task training group (DTG):</u><br>n = 26; 60.9 yrs (SD: 14.9) | Secondary tasks included listening or talking tasks: auditory Stroop task, serial subtraction, clock face task, letter fluency task, alternative uses, creativity task, radio (listening), planning of daily life activities. | 20 sessions of 45 min in 10 weeks    |                                                                                                                                                                                                                                                                                                                                                                                                                                                                                                                                                                                                                                            |
|                              | <u>Single-task training:</u><br>n = 24; 62.3 yrs (SD: 15.5)           | Participants were asked to walk with a focus on walking, with as little distraction as possible.                                                                                                                              | 20 sessions of 45 min in 10 weeks    |                                                                                                                                                                                                                                                                                                                                                                                                                                                                                                                                                                                                                                            |
| <b>ORTHOPAEDIC</b>           |                                                                       |                                                                                                                                                                                                                               |                                      |                                                                                                                                                                                                                                                                                                                                                                                                                                                                                                                                                                                                                                            |
| <b>Reference</b>             | <b>Population</b>                                                     | <b>Intervention</b>                                                                                                                                                                                                           | <b>Amount of supervised practice</b> | <b>Measurement instruments, moments, and outcome</b>                                                                                                                                                                                                                                                                                                                                                                                                                                                                                                                                                                                       |
| Conradsson & Halvarson, 2019 | N = 68 older adults with osteoporosis                                 | <u>Task trained in experimental group:</u> Balance training programme.                                                                                                                                                        |                                      | <u>Measurement instruments:</u><br>Gait parameters were measured on the GAITRite walkway system under single- and dual-task walking:<br>- Step velocity<br>- Step length<br>- Cadence<br>- Swing time<br>- Step width<br>- Step length asymmetry<br>- Step time<br>- Stance time<br>- Step time asymmetry<br>- Swing time asymmetry<br>- Stance time asymmetry<br><br><u>Measurement moments:</u><br>Pre- and post-intervention<br><br><u>Between-group differences:</u><br>Differences were found for cadence, swing time, and swing time asymmetry during normal gait and for step velocity, cadence, swing time, step time, swing time, |
|                              | <u>Dual-task training group (DTG):</u><br>n = 43; 76.0 yrs (SD: 6)    | Each session included seated, standing, and walking exercises targeting aspects of postural control. Concurrent motor and cognitive tasks were performed (e.g. counting, carrying objects).                                   | 36 sessions of 45 min in 12 weeks    |                                                                                                                                                                                                                                                                                                                                                                                                                                                                                                                                                                                                                                            |
|                              | <u>Control group:</u><br>n = 25; 76.0 yrs (SD: 5)                     | Participants were encouraged to maintain their normal physical activities and were not restricted from participating in ongoing training regimens.                                                                            | NA                                   |                                                                                                                                                                                                                                                                                                                                                                                                                                                                                                                                                                                                                                            |

|  |  |  |  |                                                                                                         |
|--|--|--|--|---------------------------------------------------------------------------------------------------------|
|  |  |  |  | stance time, and step time variability during dual-tasking gait post-intervention in favour of the DTG. |
|--|--|--|--|---------------------------------------------------------------------------------------------------------|

.....Column Break..... **Table 7.** Detailed study characteristics of 43 studies on **dual-task learning** (continued)

| <b>ORTHOPAEDIC</b>        |                                                                                |                                                                                                                                                                                                                                                                                 |                                      |                                                                                                                                                                                                                                                                                                                                                                                                            |
|---------------------------|--------------------------------------------------------------------------------|---------------------------------------------------------------------------------------------------------------------------------------------------------------------------------------------------------------------------------------------------------------------------------|--------------------------------------|------------------------------------------------------------------------------------------------------------------------------------------------------------------------------------------------------------------------------------------------------------------------------------------------------------------------------------------------------------------------------------------------------------|
| <b>Reference</b>          | <b>Population</b>                                                              | <b>Intervention</b>                                                                                                                                                                                                                                                             | <b>Amount of supervised practice</b> | <b>Measurement instruments, moments, and outcome</b>                                                                                                                                                                                                                                                                                                                                                       |
| Konak et al., 2016        | N = 42 older adults with osteoporosis                                          | <u>Task trained in experimental group:</u> Exercise programmes on static balance, dynamic balance, and activity-specific balance confidence.                                                                                                                                    |                                      | <u>Measurement instruments:</u><br>- One Leg Stance<br>- Sports Kinesthetic Ability Trainer 4000<br>- Timed Up and Go<br>- Berg Balance Scale (BBS)<br>- Gait speed (in single- and dual-task conditions)<br><br><u>Measurement moments:</u><br>Pre- and post-intervention<br><br><u>Between-group differences:</u><br>Differences were found for the BBS and walking speed in favour of the DTBG.         |
|                           | <u>Dual-task balance training group (DTBG):</u><br>n = 22; 67.9 yrs (SD: 12.5) | Balance exercises (e.g. semi-tandem stance, one-leg stance, circle turns, or toe stance) under dual-task conditions (e.g. counting backwards, counting the days of the week, or naming objects).                                                                                | 12 sessions of 45 min in 4 weeks     |                                                                                                                                                                                                                                                                                                                                                                                                            |
|                           | <u>Single-task balance training group:</u><br>n = 20; 68.8 yrs (SD: 10.1)      | Balance exercises (e.g. semi-tandem stance, one-leg stance, circle turns, or toe stance) without a secondary task.                                                                                                                                                              | 12 sessions of 45 min in 4 weeks     |                                                                                                                                                                                                                                                                                                                                                                                                            |
| Uzunkulaoglu et al., 2020 | N = 50 older adults with osteoporosis                                          | <u>Task trained in experimental group:</u> Balance training programme.                                                                                                                                                                                                          |                                      | <u>Measurement instruments:</u><br>- Sports Kinesthetic Ability Trainer 2000<br>- Timed Up and Go<br>- Berg Balance Scale (BBS)<br>- Walking speed (in single- and dual-task conditions)<br>- Activities-Specific Balance Confidence Scale<br><br><u>Measurement moments:</u><br>Pre- and post-intervention<br><br><u>Between-group differences:</u><br>No significant differences in any of the outcomes. |
|                           | <u>Dual-task balance training group:</u><br>n = 25; 72.3 yrs (SD: 5.5)         | Balance exercises (e.g. tandem stance, semi-tandem stance, one- and two-legged stance, tandem walk, circle turns, heels and toes stance) were combined with a simultaneous cognitive task (e.g. singing a song, counting backwards from 10, and counting the days of the week). | 12 sessions of 45 min in 4 weeks     |                                                                                                                                                                                                                                                                                                                                                                                                            |
|                           | <u>Single-task balance training group:</u><br>n = 25; 72.6 yrs (SD: 5.6)       | Balance exercises (e.g. tandem stance, semi-tandem stance, one- and two-legged stance, tandem walk, circle turns, heel and toe stance) without a secondary task.                                                                                                                | 12 sessions of 45 min in 4 weeks     |                                                                                                                                                                                                                                                                                                                                                                                                            |

**Table 7.** Detailed study characteristics of 43 studies on **dual-task learning** (continued)

| <b>DEMENTIA</b>      |                                                                          |                                                                                                                                                                                                                                                                                      |                                      |                                                                                                                                                                                                                                                                                    |
|----------------------|--------------------------------------------------------------------------|--------------------------------------------------------------------------------------------------------------------------------------------------------------------------------------------------------------------------------------------------------------------------------------|--------------------------------------|------------------------------------------------------------------------------------------------------------------------------------------------------------------------------------------------------------------------------------------------------------------------------------|
| <b>Reference</b>     | <b>Population</b>                                                        | <b>Intervention</b>                                                                                                                                                                                                                                                                  | <b>Amount of supervised practice</b> | <b>Measurement instruments, moments, and outcome</b>                                                                                                                                                                                                                               |
| Chen et al., 2018    | N = 28 persons with mild-to-moderate dementia                            | <u>Task trained in experimental group:</u> Walking (forward or stepped sideways).                                                                                                                                                                                                    |                                      | <u>Measurement instruments:</u><br>Gait parameters in three conditions (two dual tasks and one single task)<br>- Walking speed<br>- Stride length<br>- DTC<br>- Timed Up and Go                                                                                                    |
|                      | <u>Musical dual-task training group:</u><br>n = 15; 77.3 yrs (SD: 9.4)   | Walking while responding to obstacles (visual stimuli) and engaging in conversation (auditory stimuli). Other secondary tasks included singing or playing a (simple percussive) musical instrument.                                                                                  | 8 sessions of 60 min in 8 weeks      |                                                                                                                                                                                                                                                                                    |
|                      | <u>Single-tasking condition:</u><br>n = 13; 77.3 yrs (SD: 10.0)          | Activities involving 1) non-musical cognitive tasks and 2) walking exercises (single-task conditions)                                                                                                                                                                                | 8 sessions of 60 min in 8 weeks      | <u>Measurement moments:</u><br>Pre- and post-intervention<br><br><u>Between-group differences:</u><br>No significant differences in any of the outcomes.                                                                                                                           |
| Ghadiri et al., 2022 | N = 38 older adults with dementia                                        | <u>Task trained in experimental group:</u> Various locomotor tasks and manipulative skills (e.g. walking, running, jumping, hopping, galloping, catching, and throwing) in different displacement directions (e.g. forwards, backwards, left, right, straight, curvy, and diagonal). |                                      | <u>Measurement instruments:</u><br>Gait parameters in two conditions (single- and dual-task)<br>- Walking speed<br>- Stride length<br>- Cadence<br><br>Dual-task costs were calculated for<br>- walking speed<br>- stride length<br>- cadence                                      |
|                      | <u>Dual-task intervention group (DTI):</u><br>n = 19; 72.5 yrs (SD: 6.0) | Fundamental movement skills with cognitive activities, and locomotor and manipulative skills while completing a cognitive task (i.e. memory, attention, language, and executive function) were trained.                                                                              | 30 sessions of 50 min in 10 weeks    | <u>Measurement moments:</u><br>Pre- and post-intervention                                                                                                                                                                                                                          |
|                      | <u>Iranian dance group (IDI):</u><br>n = 19; 73 yrs (SD: 6.5)            | Dance exercises chosen from the solo improvisation and folk categories of Iranian dance.                                                                                                                                                                                             | 30 sessions of 50 min in 10 weeks    | <u>Between-group differences:</u><br>Difference was found in stride length in favour of the IDI compared to the DTI. Differences in cadence costs were found in favour of the IDI as evidenced by higher percentage change (reduction of cadence costs) compared to the DTI group. |

**Table 10.** Detailed study characteristics of 43 studies on **dual-task learning** (continued)

| <b>DEMENTIA</b>       |                                                                                                   |                                                                                                                                                                                       |                                      |                                                                                                                                                                                                                                                                                                                                                                                                                                                                                                                                                                                                                |
|-----------------------|---------------------------------------------------------------------------------------------------|---------------------------------------------------------------------------------------------------------------------------------------------------------------------------------------|--------------------------------------|----------------------------------------------------------------------------------------------------------------------------------------------------------------------------------------------------------------------------------------------------------------------------------------------------------------------------------------------------------------------------------------------------------------------------------------------------------------------------------------------------------------------------------------------------------------------------------------------------------------|
| <b>Reference</b>      | <b>Population</b>                                                                                 | <b>Intervention</b>                                                                                                                                                                   | <b>Amount of supervised practice</b> | <b>Measurement instruments, moments, and outcome</b>                                                                                                                                                                                                                                                                                                                                                                                                                                                                                                                                                           |
| Lemke et al., 2018    | N = 105 persons with dementia                                                                     | <u>Task trained in experimental group:</u> Walking, sit-to-stand, and balance manoeuvres. Both groups received similar dementia-specific, patient-centred therapy sessions.           |                                      | <u>Measurement instruments:</u><br>Gait parameters in 5 different conditions:<br>- Gait speed<br>- Cadence<br>- Stride length<br>- Single support<br>- Dual-task costs<br>In total, 55 outcomes related to motor performance were measured; see article for details.<br><br><u>Measurement moments:</u><br>Pre- and post-intervention and at 3-month follow-up<br><br><u>Between-group differences:</u><br>Differences in task performance between groups were observed for various outcomes. For all outcomes, the differences were always in favour of the dual task in comparison to the control condition. |
|                       | <u>Dual-task training group:</u><br>n = 56; 82.7 yrs (SD: 6.2)                                    | Walking and counting in low- and high-demand dual-task conditions (2-forward and 3-backward calculations). Walk and calculate as fast as possible without prioritising one task.      | 20 sessions of 90 min in 10 weeks    |                                                                                                                                                                                                                                                                                                                                                                                                                                                                                                                                                                                                                |
|                       | <u>Single-task training group:</u><br>n = 49; 82.6 yrs (SD: 5.8)                                  | Supervised motor placebo group training, including unspecific, low-intensity strength training and flexibility exercises for the upper body while seated.                             | 20 sessions of 90 min in 10 weeks    |                                                                                                                                                                                                                                                                                                                                                                                                                                                                                                                                                                                                                |
| Menengic et al., 2022 | N = 20 persons with early-middle-stage Alzheimer's disease                                        | <u>Task trained in experimental group:</u> Simple chair-based exercises.                                                                                                              |                                      | <u>Measurement instruments:</u><br>- Five Times Sit to Stand Test (5XSST)<br>- Timed Up and Go Test (TUG)<br>- One-Leg Stance Test (for the left and right leg)<br>- Katz Activities of Daily Living Scale (KATZ)<br>- Functional Independence Measurement (FIM)<br><br><u>Measurement moments:</u><br>Pre- and post-intervention<br><br><u>Between-group differences:</u><br>Differences were found in 5XSST, TUG, KATZ, and FIM in favour of the motor-cognitive dual-tasking via TR group.                                                                                                                  |
|                       | <u>Online dual-task exercise group via telerehabilitation (TR):</u><br>n = 10; 77.7 yrs (SD: 5.3) | Real-time supervised motor-cognitive dual-task exercise treatment. Cognitive tasks were added to the physical exercises. Difficulty of cognitive tasks gradually increased each week. | 25 sessions of 30 min in 6 weeks     |                                                                                                                                                                                                                                                                                                                                                                                                                                                                                                                                                                                                                |
|                       | <u>Control group (CG):</u><br>n = 10; 80.6 yrs (SD: 6.11)                                         | No physical or cognitive intervention was given.                                                                                                                                      | NA                                   |                                                                                                                                                                                                                                                                                                                                                                                                                                                                                                                                                                                                                |

**Table 7.** Detailed study characteristics of 43 studies on **dual-task learning** (continued)

| <b>DEMENTIA</b>        |                                                                                |                                                                                                                                                                                                                                                   |                                      |                                                                                                                                                                                                                                                                                                                                                                                                                                                                                                                                                                                                               |
|------------------------|--------------------------------------------------------------------------------|---------------------------------------------------------------------------------------------------------------------------------------------------------------------------------------------------------------------------------------------------|--------------------------------------|---------------------------------------------------------------------------------------------------------------------------------------------------------------------------------------------------------------------------------------------------------------------------------------------------------------------------------------------------------------------------------------------------------------------------------------------------------------------------------------------------------------------------------------------------------------------------------------------------------------|
| <b>Reference</b>       | <b>Population</b>                                                              | <b>Intervention</b>                                                                                                                                                                                                                               | <b>Amount of supervised practice</b> | <b>Measurement instruments, moments, and outcome</b>                                                                                                                                                                                                                                                                                                                                                                                                                                                                                                                                                          |
| Schwenk et al., 2010   | N = 61 persons with mild to moderate dementia                                  | <u>Task trained in experimental group:</u> Walking, stepping, sitting, and balance training in static and dynamic conditions.                                                                                                                     |                                      | <u>Measurement instruments:</u><br>Gait performance in two conditions (serial 2-forward calculation and serial 3-backward calculation):<br>- Gait speed<br>- Cadence<br>- Stride time<br>- Stride length<br>- Single support<br>- Dual-task costs (DTC: only for this outcome were between-group differences calculated)<br><br><u>Measurement moments:</u><br>Pre- and post-intervention<br><br><u>Between-group differences:</u><br>Differences were found for DTC (within the 3-backward calculation condition) in favour of the SDTG. For the other outcomes, no between-group differences were reported. |
|                        | <u>Specific dual-task training group (SDTG):</u><br>n = 26; 80.4 yrs (SD: 7.1) | Specific dual-task training and additional progressive resistance-balance and functional-balance training.<br>Secondary tasks included motor (e.g. throwing or catching a ball) or cognitive (e.g. arithmetic, repeating names of animals) tasks. | 24 sessions of 60 min in 12 weeks    |                                                                                                                                                                                                                                                                                                                                                                                                                                                                                                                                                                                                               |
|                        | <u>Single-task training group:</u><br>n = 35; 82.3 yrs (SD: 7.9)               | Unspecific low-intensity exercise activities including flexibility exercise, calisthenics, and ball games while seated.                                                                                                                           | 24 sessions of 60 min in 12 weeks    |                                                                                                                                                                                                                                                                                                                                                                                                                                                                                                                                                                                                               |
| <b>PARKINSON'S</b>     |                                                                                |                                                                                                                                                                                                                                                   |                                      |                                                                                                                                                                                                                                                                                                                                                                                                                                                                                                                                                                                                               |
| <b>Reference</b>       | <b>Population</b>                                                              | <b>Intervention</b>                                                                                                                                                                                                                               | <b>Amount of supervised practice</b> | <b>Measurement instruments, moments, and outcome</b>                                                                                                                                                                                                                                                                                                                                                                                                                                                                                                                                                          |
| Fernandes et al., 2015 | N = 15 persons with Parkinson's                                                | <u>Task trained in experimental group:</u> Balance training.                                                                                                                                                                                      |                                      | <u>Measurement instruments:</u><br>Postural sway was measured on a force platform under eyes-open and -closed conditions.<br>- Postural sway (anteroposterior and mediolateral)<br>- Timed Up and Go Test<br><br><u>Measurement moments:</u><br>Pre- and post-intervention                                                                                                                                                                                                                                                                                                                                    |

| <b>PARKINSON'S</b>                 |                                                                                   |                                                                                                                                                 |                                                                             |                                                                                                                                                                                                                                                                                                                                                                                                                                                                                                                                                                                                                                                                                                                                                                                                                                                                                                                                                      |
|------------------------------------|-----------------------------------------------------------------------------------|-------------------------------------------------------------------------------------------------------------------------------------------------|-----------------------------------------------------------------------------|------------------------------------------------------------------------------------------------------------------------------------------------------------------------------------------------------------------------------------------------------------------------------------------------------------------------------------------------------------------------------------------------------------------------------------------------------------------------------------------------------------------------------------------------------------------------------------------------------------------------------------------------------------------------------------------------------------------------------------------------------------------------------------------------------------------------------------------------------------------------------------------------------------------------------------------------------|
| <b>Reference</b>                   | <b>Population</b>                                                                 | <b>Intervention</b>                                                                                                                             | <b>Amount of supervised practice</b>                                        | <b>Measurement instruments, moments, and outcome</b>                                                                                                                                                                                                                                                                                                                                                                                                                                                                                                                                                                                                                                                                                                                                                                                                                                                                                                 |
| Fernandes et al., 2015 (continued) | <u>Dual-task training group (DTG):</u><br>$n = 7$ ; 63.4 yrs (SD: 9.5 yrs)        | Participants performed motor tasks (e.g. walking backwards while holding a basket) while they performed cognitive tasks (e.g. spelling words).  | 12 sessions of 60 min in 6 weeks                                            | <u>Between-group differences:</u><br>Differences were found in anteroposterior and mediolateral sway post-intervention in favour of the DTG.                                                                                                                                                                                                                                                                                                                                                                                                                                                                                                                                                                                                                                                                                                                                                                                                         |
|                                    | <u>Single-task training group:</u><br>$n = 8$ ; 62.3 yrs (SD: 12.9 yrs)           | Participants performed the same exercise as the dual-task training group minus the secondary cognitive task.                                    | 12 sessions of 60 min in 6 weeks                                            |                                                                                                                                                                                                                                                                                                                                                                                                                                                                                                                                                                                                                                                                                                                                                                                                                                                                                                                                                      |
| Geroin et al., 2018                | N = 121 persons with Parkinson's                                                  | <u>Task trained in experimental group:</u> Gait and functional training.                                                                        | Both groups also performed 30 minutes of unsupervised training twice a week | <u>Measurement instruments:</u><br>Gait parameters were measured on the GAITRite walkway system under Auditory Stroop Task and Digit Span Task conditions:<br>- Stride length                      - Swing time<br>- Stride length SD                - Stance %<br>- Cadence                              - Stance time<br>- Stride time                         - Double support %<br>- Stride time SD                  - Support base<br>- Swing %                              - Step length asymmetry<br><br><u>Other outcomes:</u><br>- Fall rate<br>- Activities-Specific Balance Confidence Scale<br><br><u>Measurement moments:</u><br>Pre-, midterm, and post-intervention and at follow-up<br><br><u>Between-group differences:</u><br>Differences were found for stride length, cadence, stride time, swing %, stance %, stance time, double support % post-intervention and in the follow-up during dual-task walking in favour of IDTG. |
|                                    | <u>Integrated dual-task training (IDTG):</u><br>$n = 56$ ; 65.8 yrs (SD: 9.2 yrs) | Participants performed gait training (e.g. turning and manoeuvring around the house) in combination with cognitive tasks (e.g. verbal fluency). | 24 sessions of 40 min in 12 weeks                                           |                                                                                                                                                                                                                                                                                                                                                                                                                                                                                                                                                                                                                                                                                                                                                                                                                                                                                                                                                      |
|                                    | <u>Consecutive task training:</u><br>$n = 65$ ; 66.1 yrs (SD: 9.3 yrs)            | Participants only practised single tasks. First, walking was practised; then, the cognitive task was practised.                                 | 24 sessions of 40 min in 12 weeks                                           |                                                                                                                                                                                                                                                                                                                                                                                                                                                                                                                                                                                                                                                                                                                                                                                                                                                                                                                                                      |

**Table 7.** Detailed study characteristics of 43 studies on **dual-task learning** (continued).

| <b>PARKINSON'S</b>       |                                                                 |                                                                                                                                                                                                |                                      |                                                                                                                                                                                                                                                                                                                                                                                                                                                                                                                                                                                                       |
|--------------------------|-----------------------------------------------------------------|------------------------------------------------------------------------------------------------------------------------------------------------------------------------------------------------|--------------------------------------|-------------------------------------------------------------------------------------------------------------------------------------------------------------------------------------------------------------------------------------------------------------------------------------------------------------------------------------------------------------------------------------------------------------------------------------------------------------------------------------------------------------------------------------------------------------------------------------------------------|
| <b>Reference</b>         | <b>Population</b>                                               | <b>Intervention</b>                                                                                                                                                                            | <b>Amount of supervised practice</b> | <b>Measurement instruments, moments, and outcome</b>                                                                                                                                                                                                                                                                                                                                                                                                                                                                                                                                                  |
| Jäggi et al., 2023       | N = 40 persons with Parkinson's                                 | <u>Task trained in experimental group:</u> Balance and coordination. All participants received a conventional rehabilitation programme.                                                        |                                      | <u>Measurement instruments:</u><br>- Go/No Go Test<br>- Gait speed<br>- Short physical performance battery<br>- Timed Up and Go Test<br><br><u>Measurement moments:</u><br>Pre- and post-intervention<br><br><u>Between-group differences:</u><br>No significant differences in any of the outcomes.                                                                                                                                                                                                                                                                                                  |
|                          | <u>Dual-task training:</u><br>n = 19; 71.9 yrs (SD: 9.1)        | Participants trained on the exergaming device Dividat Senso. The training contained motor tasks (e.g. stepping in four directions) with simultaneous cognitive tasks (e.g. attentional focus). | 15 sessions of 15 min in 3 weeks     |                                                                                                                                                                                                                                                                                                                                                                                                                                                                                                                                                                                                       |
|                          | <u>Single-task training:</u><br>n = 21; 72.9 yrs (SD: 10.1)     | Participants underwent the conventional rehabilitation programme.                                                                                                                              | NR                                   |                                                                                                                                                                                                                                                                                                                                                                                                                                                                                                                                                                                                       |
| Silva et al., 2019, 2023 | N = 25 persons with Parkinson's                                 | <u>Task trained in experimental group:</u> Aquatic exercise.                                                                                                                                   |                                      | <u>Measurement instruments:</u><br>- Timed Up and Go Test (TUG)<br>- Five Times Sit to Stand Test (FTSTS)<br>- Berg Balance Scale (BBS)<br>- Dynamic Gait Index (DGI)<br>- Unified Parkinson's Disease Rating Scale (UPDRS)<br>- ADL<br>- motor examination<br><br><u>Measurement moments:</u><br>Pre- and post-intervention, and at follow-up<br><br><u>Between-group differences:</u><br>In Silva et al. (2019), differences were found for the TUG, FTSTS, BBS, and DGI post-intervention and at follow-up in favour of the DTG.<br><br>In Silva et al. (2023), differences for the UPDRS were NR. |
|                          | <u>Dual-task training (DTG):</u><br>n = 14; 63.1 yrs (SD: 13.6) | Motor tasks (e.g. aquatic walking exercises or passing a ball in a group) were combined with cognitive tasks (e.g. responding to whistle blows).                                               | 20 sessions of 60 min in 10 weeks    |                                                                                                                                                                                                                                                                                                                                                                                                                                                                                                                                                                                                       |
|                          | <u>Control group:</u><br>n = 11; 64.2 yrs (SD: 13.5)            | Continuation of daily living.                                                                                                                                                                  | NA                                   |                                                                                                                                                                                                                                                                                                                                                                                                                                                                                                                                                                                                       |

**Table 7.** Detailed study characteristics of 43 studies on **dual-task learning** (continued)

| <b>PARKINSON'S</b>      |                                                                                    |                                                                                                                                                                                                                                           |                                      |                                                                                                                                                                                                                                                                                                                                                                                                                                                                                                                                                                                                                                                                                                         |
|-------------------------|------------------------------------------------------------------------------------|-------------------------------------------------------------------------------------------------------------------------------------------------------------------------------------------------------------------------------------------|--------------------------------------|---------------------------------------------------------------------------------------------------------------------------------------------------------------------------------------------------------------------------------------------------------------------------------------------------------------------------------------------------------------------------------------------------------------------------------------------------------------------------------------------------------------------------------------------------------------------------------------------------------------------------------------------------------------------------------------------------------|
| <b>Reference</b>        | <b>Population</b>                                                                  | <b>Intervention</b>                                                                                                                                                                                                                       | <b>Amount of supervised practice</b> | <b>Measurement instruments, moments, and outcome</b>                                                                                                                                                                                                                                                                                                                                                                                                                                                                                                                                                                                                                                                    |
| Valenzuela et al., 2020 | N = 40 persons with Parkinson's                                                    | <u>Task trained in experimental group:</u> Gait training.                                                                                                                                                                                 |                                      | <u>Measurement instruments:</u><br>Gait parameters were measured under single-tasking and four different dual-tasking conditions (visual, verbal, auditory, and motor):<br>- Gait velocity    - Cadence<br>- Stride length    - Step width<br><br><u>Measurement moments:</u><br>Pre- and post-intervention, and at follow-up<br><br><u>Between-group differences:</u><br>Differences were found for gait velocity and stride length in all conditions, and single-tasking cadence post-intervention in the follow-up, in favour of the DTG.                                                                                                                                                            |
|                         | <u>Dual-task training (DTG):</u><br>n = 23; 66.4 yrs (SD: 7.1)                     | Participants performed gait training while performing a secondary cognitive (e.g. answering a complex question) or motor task (e.g. removing an item from your pocket).                                                                   | 20 sessions of 60 min in 10 weeks    |                                                                                                                                                                                                                                                                                                                                                                                                                                                                                                                                                                                                                                                                                                         |
|                         | <u>Single-task training:</u><br>n = 17; 64.8 yrs (SD: 8.8)                         | Gait training without secondary task.                                                                                                                                                                                                     | 20 sessions of 60 min in 10 weeks    |                                                                                                                                                                                                                                                                                                                                                                                                                                                                                                                                                                                                                                                                                                         |
| Yang et al., 2019       | N = 18 persons with Parkinson's                                                    | <u>Task trained in experimental group:</u> walking forwards, obstacle crossing walking, walking on an S-shaped route, tandem walking, and walking backwards. Participants were progressively trained with increased difficulty of tasks.  |                                      | <u>Measurement instruments:</u><br>Gait parameters in 3 different conditions (two dual-task and one single-task):<br>- Walking speed                    - Double support time<br>- Stride length                    - Stride time variability<br>- Cadence<br>- Dual-task cost-speed<br>- Timed Up and Go<br><br><u>Measurement moments:</u><br>Pre- and post-intervention<br><br><u>Between-group differences:</u><br>Differences were found for double support time in the cognitive dual-task condition in favour of the CDTT in comparison to the MDTT and CG. Differences were also found for stride time variability during motor dual-tasking in favour of the MDTT compared to the CDTT and CG. |
|                         | <u>Cognitive dual-task gait training group (CDTT):</u><br>n = 6; 65.0 yrs (SD: NR) | Cognitive dual tasks: repeating words, counting a 3-digit number, answering simple questions 'yes' or 'no', reciting a shopping list, reciting a short sentence backwards, and singing.                                                   | 12 sessions of 30 min in 4 weeks     |                                                                                                                                                                                                                                                                                                                                                                                                                                                                                                                                                                                                                                                                                                         |
|                         | <u>Motor dual-task gait training group (MDTT):</u><br>n = 6; 69.5 yrs (SD: NR)     | Motor dual tasks: holding one ball with both hands; bouncing a basketball with both hands; bouncing a basketball with either hand; bouncing one basketball with one hand and concurrently holding another basketball with the other hand. | 12 sessions of 30 min in 4 weeks     |                                                                                                                                                                                                                                                                                                                                                                                                                                                                                                                                                                                                                                                                                                         |
|                         | <u>Control training group (CG):</u><br>n = 6; 66.5 yrs (SD: NR)                    | Practised the task without secondary tasks.                                                                                                                                                                                               | 12 sessions of 30 min in 4 weeks     |                                                                                                                                                                                                                                                                                                                                                                                                                                                                                                                                                                                                                                                                                                         |



**Table 7.** Detailed study characteristics of 43 studies on **dual-task learning** (continued)

| <b>OLDER ADULTS</b>  |                                                                     |                                                                                                                                                                                                                                                                                                                                |                                      |                                                                                                                                                                                                                                                                                                                                                                                                                          |
|----------------------|---------------------------------------------------------------------|--------------------------------------------------------------------------------------------------------------------------------------------------------------------------------------------------------------------------------------------------------------------------------------------------------------------------------|--------------------------------------|--------------------------------------------------------------------------------------------------------------------------------------------------------------------------------------------------------------------------------------------------------------------------------------------------------------------------------------------------------------------------------------------------------------------------|
| <b>Reference</b>     | <b>Population</b>                                                   | <b>Intervention</b>                                                                                                                                                                                                                                                                                                            | <b>Amount of supervised practice</b> | <b>Measurement instruments, moments, and outcome</b>                                                                                                                                                                                                                                                                                                                                                                     |
| Brustio et al., 2017 | N = 60 older adults                                                 | <u>Task trained in experimental group:</u> Physical training based on balance and walking exercises. Motor tasks based around activities of daily living.                                                                                                                                                                      |                                      | <u>Measurement instruments:</u><br>- Timed Up and Go Test<br>- 6-Minute Walk Test<br>- Four Square Step Test<br><br><u>Measurement moments:</u><br>Pre- and post-intervention<br><br><u>Between-group differences:</u><br>No significant differences in any of the outcomes.                                                                                                                                             |
|                      | <u>Dual-task training group:</u><br>n = 19; 74.3 yrs (SD: 2.6)      | Holding progressively more difficult static postures or walking on a circular route, in a straight line, forwards, and backwards, was combined with ADL motor tasks (e.g. unbuttoning a shirt or unscrewing a nut and bolt).                                                                                                   | 32 sessions of 60 min in 16 weeks    |                                                                                                                                                                                                                                                                                                                                                                                                                          |
|                      | <u>Single-task training group:</u><br>n = 19; 75.2 yrs (SD: 3.4)    | The same exercises were performed as in the dual-tasking group minus the concurrent ADL motor tasks.                                                                                                                                                                                                                           | 32 sessions of 60 min in 16 weeks    |                                                                                                                                                                                                                                                                                                                                                                                                                          |
|                      | <u>Control group:</u><br>n = 22; 74.0 yrs (SD: 3.2)                 | Maintenance of their usual lifestyle without additional training.                                                                                                                                                                                                                                                              | NA                                   |                                                                                                                                                                                                                                                                                                                                                                                                                          |
| Pessoa et al., 2020  | N = 30 older adults                                                 | <u>Task trained in experimental group:</u> A variety of walking and balancing exercises.                                                                                                                                                                                                                                       |                                      | <u>Measurement instruments:</u><br>Measurements were performed under single- and motor and cognitive dual-tasking:<br>- Figure of 8 Walk (F8W)<br>- Timed-up and Go Test (TUG)<br><br><u>Measurement moments:</u><br>Pre- and post-intervention<br><br><u>Between-group differences:</u><br>Differences were found for TUG, TUG with concurrent motor task, and F8W with concurrent cognitive task in favour of the DTG. |
|                      | <u>Dual-task training group (DTG):</u><br>n = 15; 70.0 yrs (SD: NR) | Nine different motor-motor or motor-cognitive tasks were practised (e.g. walking the figure of eight while passing a ball around the waist, putting beans in a container with the non-dominant hand while singing a song, or throwing a ball against the wall and picking it up while reciting the days of the week backwards) | 1 session of 40 min                  |                                                                                                                                                                                                                                                                                                                                                                                                                          |
|                      | <u>Single-task training group:</u><br>n = 15; 70.0 yrs (SD: NR)     | The same exercises were performed as in the dual-tasking group minus the concurrent motor or cognitive task.                                                                                                                                                                                                                   | 1 session of 40 min                  |                                                                                                                                                                                                                                                                                                                                                                                                                          |

**Table 7.** Detailed study characteristics of 43 studies on **dual-task learning** (continued)

| <b>OLDER ADULTS</b>   |                                                                      |                                                                                                                                                                                                                                                                                       |                                         |                                                                                                                                                                                                                                                                                                                                                                                                                                                                                                   |
|-----------------------|----------------------------------------------------------------------|---------------------------------------------------------------------------------------------------------------------------------------------------------------------------------------------------------------------------------------------------------------------------------------|-----------------------------------------|---------------------------------------------------------------------------------------------------------------------------------------------------------------------------------------------------------------------------------------------------------------------------------------------------------------------------------------------------------------------------------------------------------------------------------------------------------------------------------------------------|
| <b>Reference</b>      | <b>Population</b>                                                    | <b>Intervention</b>                                                                                                                                                                                                                                                                   | <b>Amount of supervised practice</b>    | <b>Measurement instruments, moments, and outcome</b>                                                                                                                                                                                                                                                                                                                                                                                                                                              |
| Gregory et al., 2016  | N = 44 older adults                                                  | <u>Task trained in experimental group:</u> Group-based exercise programme with aerobic exercise, strength, balance, and flexibility training.                                                                                                                                         |                                         | <u>Measurement instruments:</u><br>Gait parameters were measured on the GAITRite walkway system under single- and dual-task walking:<br>- Gait velocity<br>- Step length<br>- Stride time<br><br><u>Measurement moments:</u><br>Pre- and post-intervention, and at follow-up<br><br><u>Between-group differences:</u><br>Differences were found for gait velocity, step length, and stride time variability during dual-task walking post-intervention and in the follow-up in favour of the DTG. |
|                       | <u>Dual-task training group (DTG):</u><br>n = 23; 72.6 yrs (SD: 7.0) | Participants performed square stepping exercises (following a pattern of forward, lateral, and diagonal foot placements on a mat) while answering cognitive challenging questions (e.g. semantic and phonemic verbal fluency task and 2- or 3-digit subtraction).                     | 52 to 78 sessions of 75 min in 26 weeks |                                                                                                                                                                                                                                                                                                                                                                                                                                                                                                   |
|                       | <u>Exercise only group:</u><br>n = 21; 74.5 yrs (SD: 7.4)            | Participants received the same exercises as the dual-tasking group minus the cognitive task.                                                                                                                                                                                          | 52 to 78 sessions of 75 min in 26 weeks |                                                                                                                                                                                                                                                                                                                                                                                                                                                                                                   |
| Hiyamizu et al., 2012 | N = 36 older adults                                                  | <u>Task trained in experimental group:</u> Strength and balance training.                                                                                                                                                                                                             |                                         | <u>Measurement instruments:</u><br>- Chair Stand Test<br>- Functional Reach Test<br>- Timed Up and Go Test<br><br><u>Measurement moments:</u><br>Pre- and post-intervention<br><br><u>Between-group differences:</u><br>No significant differences in any of the outcomes.                                                                                                                                                                                                                        |
|                       | <u>Dual-task training group:</u><br>n = 17; yrs (SD: 5.1)            | Balance training was carried out on a regular floor, a balance pad plus, and a balance beam. This was combined with concurrent cognitive tasks (e.g. four-function calculation of up to two-digit numbers, comparing drawings and naming differences, or naming words in a category). | 24 sessions of 60 min in 12 weeks       |                                                                                                                                                                                                                                                                                                                                                                                                                                                                                                   |
|                       | <u>Single-task training group:</u><br>n = 19; yrs (SD: 4.4)          | Balance and strength exercises without secondary tasks.                                                                                                                                                                                                                               | 24 sessions of 60 min in 12 weeks       |                                                                                                                                                                                                                                                                                                                                                                                                                                                                                                   |

**Table 7.** Detailed study characteristics of 43 studies on **dual-task learning** (continued)

| <b>OLDER ADULTS</b>    |                                                                        |                                                                                                                                                                                                                                                       |                                      |                                                                                                                                                                                                                                                                                                                                                                                                                                                                                                                                                                                                                        |
|------------------------|------------------------------------------------------------------------|-------------------------------------------------------------------------------------------------------------------------------------------------------------------------------------------------------------------------------------------------------|--------------------------------------|------------------------------------------------------------------------------------------------------------------------------------------------------------------------------------------------------------------------------------------------------------------------------------------------------------------------------------------------------------------------------------------------------------------------------------------------------------------------------------------------------------------------------------------------------------------------------------------------------------------------|
| <b>Reference</b>       | <b>Population</b>                                                      | <b>Intervention</b>                                                                                                                                                                                                                                   | <b>Amount of supervised practice</b> | <b>Measurement instruments, moments, and outcome</b>                                                                                                                                                                                                                                                                                                                                                                                                                                                                                                                                                                   |
| Javadpour et al., 2022 | N = 69 older adults                                                    | <u>Task trained in experimental group:</u> Balance training.                                                                                                                                                                                          |                                      | <u>Measurement instruments:</u><br>Harmonic ratio and walking speed measured in single- and dual-task:<br>- Harmonic ratio (in three axes)<br>- Walking speed<br><br><u>Other outcomes:</u><br>- Fullerton Advanced Balance Scale<br>- Activities-Specific Balance Confidence Scale<br>- Timed Up and Go Test<br><br><u>Measurement moments:</u><br>Pre- and post-intervention<br><br><u>Between-group differences:</u><br>Differences were found for all outcomes post-intervention (except for single-task gait speed) in favour of the STG and DTG compared to the CG. Differences between the STG and DTG were NR. |
|                        | <u>Dual-task training group (DTG):</u><br>n = 23; 68.9 yrs (SD: 3.4)   | Participants performed balance exercises (e.g. tandem stance, walking on a foam surface, or a lateral lunge) while simultaneously performing a cognitive task (e.g. naming cities, naming boys' or girls' names, or counting backwards by four).      | 18 sessions of 40-60 min in 6 weeks  |                                                                                                                                                                                                                                                                                                                                                                                                                                                                                                                                                                                                                        |
|                        | <u>Single-task training group (STG):</u><br>n = 23; 67.7 yrs (SD: 2.4) | The same balance exercises as the dual-task training group were performed minus the secondary tasks.                                                                                                                                                  | 18 sessions of 40-60 min in 6 weeks  |                                                                                                                                                                                                                                                                                                                                                                                                                                                                                                                                                                                                                        |
|                        | <u>Control group (CG):</u><br>n = 23; 69.3 yrs (SD: 3.7)               | Continuation of daily life.                                                                                                                                                                                                                           | NA                                   |                                                                                                                                                                                                                                                                                                                                                                                                                                                                                                                                                                                                                        |
| Kitazawa et al., 2015  | N = 60 older adults                                                    | <u>Task trained in experimental group:</u> Net step exercise programme.                                                                                                                                                                               |                                      | <u>Measurement instruments:</u><br>- Timed Up and Go Test<br><br><u>Measurement moments:</u><br>Pre- and post-intervention<br><br><u>Between-group differences:</u><br>No significant differences in any of the outcomes.                                                                                                                                                                                                                                                                                                                                                                                              |
|                        | <u>Dual-task training group:</u><br>n = 30; 76.8 yrs (SD: 4.4)         | Stepping exercises on a Fumamat (a grid made out of ropes) that started with a trial to get acquainted with the steps. Then, participants were instructed to follow the rhythm and direction of others while simultaneously singing children's songs. | 8 sessions of 60 min in 8 weeks      |                                                                                                                                                                                                                                                                                                                                                                                                                                                                                                                                                                                                                        |
|                        | <u>Control group:</u><br>n = 30; 75.5 yrs (SD: 3.7)                    | Continuation of daily living.                                                                                                                                                                                                                         | NA                                   |                                                                                                                                                                                                                                                                                                                                                                                                                                                                                                                                                                                                                        |

**Table 7.** Detailed study characteristics of 43 studies on **dual-task learning** (continued)

| <b>OLDER ADULTS</b>     |                                                                              |                                                                                                                                                                                                                                                     |                                      |                                                                                                                                                                                                                                                                                                                                                                        |
|-------------------------|------------------------------------------------------------------------------|-----------------------------------------------------------------------------------------------------------------------------------------------------------------------------------------------------------------------------------------------------|--------------------------------------|------------------------------------------------------------------------------------------------------------------------------------------------------------------------------------------------------------------------------------------------------------------------------------------------------------------------------------------------------------------------|
| <b>Reference</b>        | <b>Population</b>                                                            | <b>Intervention</b>                                                                                                                                                                                                                                 | <b>Amount of supervised practice</b> | <b>Measurement instruments, moments, and outcome</b>                                                                                                                                                                                                                                                                                                                   |
| Nascimento et al., 2023 | N = 44 older adults                                                          | <u>Task trained in experimental group:</u> Walking and Balancing.                                                                                                                                                                                   |                                      | <u>Measurement instruments:</u><br>- Timed Up and Go Test<br>- Manual Timed Up and Go Test<br>- Cognitive Timed Up and Go Test<br>- Postural Balance Test<br>- Sit to Stand Test<br><br><u>Measurement moments:</u><br>Pre-intervention, midterm, and post-intervention<br><br><u>Between-group differences:</u><br>No significant differences in any of the outcomes. |
|                         | <u>Dual-task training group:</u><br>n = 22; 66.1 yrs (SD: 4.1)               | Different walking exercises and balance exercises (e.g. standing with eyes closed, walking on a soft surface, or walking with big steps) were combined with cognitive exercises (e.g. spelling words, memorising 3-5 words as quickly as possible). | 24 sessions of 60 min in 12 weeks    |                                                                                                                                                                                                                                                                                                                                                                        |
|                         | <u>Education control group:</u><br>n = 22; 66.3 yrs (SD: 4.0)                | Participants in this group joined educational workshops organised by a multidisciplinary team.                                                                                                                                                      | 24 sessions of 60 min in 12 weeks    |                                                                                                                                                                                                                                                                                                                                                                        |
| Norouzi et al., 2019    | N = 60 older adults                                                          | <u>Task trained in experimental group:</u> Isokinetic resistance training.                                                                                                                                                                          |                                      | <u>Measurement instruments:</u><br>- Berg Balance Scale (BBS)<br><br><u>Measurement moments:</u><br>Pre- and post-intervention, and at follow-up<br><br><u>Between-group differences:</u><br>Differences were found for the BBS both post-intervention and at follow-up in favour of the MMDTG compared to the MCDTG and CG.                                           |
|                         | <u>Motor-motor training group (MMDTG):</u><br>n = 20; 68.3 yrs (SD: 4.1)     | Isokinetic resistance training on a machine for the lower limbs while performing motor tasks (e.g. throwing, holding, or balancing objects).                                                                                                        | 12 sessions of 60-80 min in 4 weeks  |                                                                                                                                                                                                                                                                                                                                                                        |
|                         | <u>Motor-cognitive training group (MCDTG):</u><br>n = 20; 68.5 yrs (SD: 3.7) | Isokinetic resistance training on a machine for the lower limbs while performing cognitive tasks (e.g. remembering shapes and colours).                                                                                                             | 12 sessions of 60-80 min in 4 weeks  |                                                                                                                                                                                                                                                                                                                                                                        |
|                         | <u>Control group:</u><br>n = 20; 68.1 yrs (SD: 3.7)                          | Participants met in groups to discuss issues related to daily life and retirement and to explore coping strategies.                                                                                                                                 | 12 sessions of 60-80 min in 4 weeks  |                                                                                                                                                                                                                                                                                                                                                                        |

**Table 7.** Detailed study characteristics of 43 studies on **dual-task learning** (continued)

| <b>OLDER ADULTS</b>          |                                                                             |                                                                                                                                                                                                                                                   |                                      |                                                                                                                                                                                                                                                                                                                                                                                                                                           |
|------------------------------|-----------------------------------------------------------------------------|---------------------------------------------------------------------------------------------------------------------------------------------------------------------------------------------------------------------------------------------------|--------------------------------------|-------------------------------------------------------------------------------------------------------------------------------------------------------------------------------------------------------------------------------------------------------------------------------------------------------------------------------------------------------------------------------------------------------------------------------------------|
| <b>Reference</b>             | <b>Population</b>                                                           | <b>Intervention</b>                                                                                                                                                                                                                               | <b>Amount of supervised practice</b> | <b>Measurement instruments, moments, and outcome</b>                                                                                                                                                                                                                                                                                                                                                                                      |
| Plummer-D'Amato et al., 2012 | N = 17 older adults                                                         | <u>Task trained in experimental group:</u> Walking and balance exercises.                                                                                                                                                                         |                                      | <u>Measurement instruments:</u><br>- Timed Up and Go Test<br>- Gait speed<br>- Activities-Specific Balance Confidence Scale<br>- 6-Metre Obstacle Course<br><br><u>Measurement moments:</u><br>Pre- and post-intervention<br><br><u>Between-group differences:</u><br>No significant differences in any of the outcomes.                                                                                                                  |
|                              | <u>Dual-task training group:</u><br>n = 10; 76.6 yrs (SD: 5.6)              | Gait agility training and balance training (e.g. walking on foam, obstacle negotiation, or a rope ladder) while performing cognitive tasks (e.g. naming words starting with the letter P, backward recitation, or naming a recent shopping list). | 4 sessions of 45 min in 4 weeks      |                                                                                                                                                                                                                                                                                                                                                                                                                                           |
|                              | <u>Single-task training group:</u><br>n = 7; 76.7 yrs (SD: 6.0)             | Identical gait agility and balance training without the cognitive secondary task.                                                                                                                                                                 | 4 sessions of 45 min in 4 weeks      |                                                                                                                                                                                                                                                                                                                                                                                                                                           |
| Raichlen et al., 2020        | N = 74 older adults                                                         | <u>Task trained in experimental group:</u> Stationary biking.                                                                                                                                                                                     |                                      | <u>Measurement instruments:</u><br>Gait parameters were measured with accelerometers:<br>- Stride length<br>- Stride length variability<br>- Stride duration<br>- Stride duration variability<br>- Stride velocity<br>- Stride velocity variability<br><br><u>Measurement moments:</u><br>Pre-intervention, midterm, and post-intervention<br><br><u>Between-group differences:</u><br>No significant differences in any of the outcomes. |
|                              | <u>Cognitive training group:</u><br>n = 21; 66.4 yrs (SD: 3.9)              | The main task of training was navigating through a maze on a screen with handheld controllers with added tasks completed along the way (e.g. verbal paired associates or the N-back).                                                             | 36 sessions of 30-40 min in 12 weeks |                                                                                                                                                                                                                                                                                                                                                                                                                                           |
|                              | <u>Exercise training group:</u><br>n = 19; 68.1 yrs (SD: 3.9)               | Aerobic exercise training on a stationary recumbent bicycle at 50-80% of HRR.                                                                                                                                                                     | 36 sessions of 30-40 min in 12 weeks |                                                                                                                                                                                                                                                                                                                                                                                                                                           |
|                              | <u>Cognitive and exercise training group:</u><br>n = 20; 67.7 yrs (SD: 4.7) | Simultaneous cognitive and aerobic exercise training. A combination of the cognitive and exercise training groups.                                                                                                                                | 36 sessions of 30-40 min in 12 weeks |                                                                                                                                                                                                                                                                                                                                                                                                                                           |
|                              | <u>Control group:</u><br>n = 14; 69.3 yrs (SD: 4.3)                         | Participants watched videos that were relatively neutral in terms of interest and content.                                                                                                                                                        | 36 sessions of 30-40 min in 12 weeks |                                                                                                                                                                                                                                                                                                                                                                                                                                           |

**Table 7.** Detailed study characteristics of 43 studies on **dual-task learning** (continued).

| <b>OLDER ADULTS</b>          |                                                                      |                                                                                                                                                                                                                                                             |                                      |                                                                                                                                                                                                                                                                                                                                                                                                                                                              |
|------------------------------|----------------------------------------------------------------------|-------------------------------------------------------------------------------------------------------------------------------------------------------------------------------------------------------------------------------------------------------------|--------------------------------------|--------------------------------------------------------------------------------------------------------------------------------------------------------------------------------------------------------------------------------------------------------------------------------------------------------------------------------------------------------------------------------------------------------------------------------------------------------------|
| <b>Reference</b>             | <b>Population</b>                                                    | <b>Intervention</b>                                                                                                                                                                                                                                         | <b>Amount of supervised practice</b> | <b>Measurement instruments, moments, and outcome</b>                                                                                                                                                                                                                                                                                                                                                                                                         |
| Sinaei et al., 2016          | N = 24 older adults                                                  | <u>Task trained in experimental group:</u> Balance training.                                                                                                                                                                                                |                                      | <u>Measurement instruments:</u><br>- Fullerton Advanced Balance Scale<br><br><u>Measurement moments:</u><br>Pre- and post-intervention<br><br><u>Between-group differences:</u><br>No significant differences in any of the outcomes.                                                                                                                                                                                                                        |
|                              | <u>Dual-task training group:</u><br>n = 12; 63.8 yrs (SD: 5.0)       | Participants performed balance tasks (e.g. catching and throwing a ball in stance, controlling balance during the Romberg test, or balancing on a gym ball) while performing a cognitive task (e.g. naming streets, naming flowers, or counting backwards). | 12 sessions of 45 min in 4 weeks     |                                                                                                                                                                                                                                                                                                                                                                                                                                                              |
|                              | <u>Single-task training group:</u><br>n = 12; 65.2 yrs (SD: 4.9)     | Participants performed the same exercises as the dual-tasking training group minus the cognitive task.                                                                                                                                                      | 12 sessions of 45 min in 4 weeks     |                                                                                                                                                                                                                                                                                                                                                                                                                                                              |
| Tasvuran Horata et al., 2021 | N = 32 older adults                                                  | <u>Task trained in experimental group:</u> Walking and Balancing.                                                                                                                                                                                           |                                      | <u>Measurement instruments:</u><br>Gait parameters in single- and dual-tasking conditions:<br>- Gait speed<br>- Cadence<br>- Step length (left and right)<br><br><u>Measurement moments:</u><br>Pre- and post-intervention<br><br><u>Between-group differences:</u><br>Differences were found for gait speed in single- and dual-tasking, right step length in dual-tasking, and cadence in single- and dual-tasking post-intervention in favour of the DTG. |
|                              | <u>Dual-task training group (DTG):</u><br>n = 16; 65.6 yrs (SD: 2.6) | Participants performed gait and balance tasks (e.g. reaching, fast walking, or single-leg stance) while performing cognitive tasks (e.g. recalling a number sequence, counting forwards, or drawing a letter on the floor with your foot).                  | 12 sessions of 60 min in 6 weeks     |                                                                                                                                                                                                                                                                                                                                                                                                                                                              |
|                              | <u>Single-task training group:</u><br>n = 16; 64.6 yrs (SD: 3.3)     | Participants performed the same motor exercises as the dual-task training group without the secondary tasks.                                                                                                                                                | 12 sessions of 60 min in 6 weeks     |                                                                                                                                                                                                                                                                                                                                                                                                                                                              |

**Table 7.** Detailed study characteristics of 43 studies on **dual-task learning** (continued).

| <b>OLDER ADULTS</b>    |                                                                          |                                                                                                                                                                                                                                                                                                                                       |                                      |                                                                                                                                                                                                                                                                                                                                                                                                                                                                                                                                                    |
|------------------------|--------------------------------------------------------------------------|---------------------------------------------------------------------------------------------------------------------------------------------------------------------------------------------------------------------------------------------------------------------------------------------------------------------------------------|--------------------------------------|----------------------------------------------------------------------------------------------------------------------------------------------------------------------------------------------------------------------------------------------------------------------------------------------------------------------------------------------------------------------------------------------------------------------------------------------------------------------------------------------------------------------------------------------------|
| <b>Reference</b>       | <b>Population</b>                                                        | <b>Intervention</b>                                                                                                                                                                                                                                                                                                                   | <b>Amount of supervised practice</b> | <b>Measurement instruments, moments, and outcome</b>                                                                                                                                                                                                                                                                                                                                                                                                                                                                                               |
| Trombetti et al., 2011 | N = 134 older adults                                                     | <u>Task trained in experimental group:</u> Walking and balancing. Both groups received dual-task training, but one from the start and the other after 6 months.                                                                                                                                                                       |                                      | <u>Measurement instruments:</u><br>GAITRite walkway system during single- and dual-tasking:<br>- Gait velocity                      - Support base<br>- Stride length                       - Stride time variability<br>- Cadence                              - Stride length variability<br>- Double support phase<br><br>Other outcomes:<br>- Timed Up and Go Test<br>- Tinetti Test<br>- Fall rate                                                                                                                                            |
|                        | <u>Early intervention group (EIG):</u><br>n = 66; 75.0 yrs (SD: 8.0)     | Participants in this group performed walking and balancing exercises (e.g. multidirectional weight shifting, turn sequences, or exaggerated upper body movements while walking and standing). The secondary task was a musical cue (e.g. walking to the rhythm, playing a percussion instrument, or adapting to a change in rhythms). | 26 sessions of 60 min in 26 weeks    |                                                                                                                                                                                                                                                                                                                                                                                                                                                                                                                                                    |
|                        | <u>Delayed intervention control group:</u><br>n = 68; 76.0 yrs (SD: 6.0) | Subjects in the delayed control group were instructed to maintain their usual lifestyle for the first part of the study, whereafter they commenced the same intervention as the early intervention group.                                                                                                                             | 26 sessions of 60 min in 26 weeks    | <u>Measurement moments:</u><br>Pre- and post-intervention and at follow-up<br><br><u>Between-group differences:</u><br>Differences were found in fall rate, gait velocity, stride length, stride time variability during single-task walking post-intervention in favour of the EIG.<br><br>Differences were also found in stride length and stride length variability during dual-task walking post-intervention in favour of the EIG.<br><br>Differences were also found in the TUG and the Tinetti Test post-intervention in favour of the EIG. |

**Table 7.** Detailed study characteristics of 43 studies on **dual-task learning** (continued).

| <b>OLDER ADULTS</b> |                                                             |                                                                                                                                                                                                                                                                                                                                                                      |                                                                       |                                                                                                                                                                                                                                                                |
|---------------------|-------------------------------------------------------------|----------------------------------------------------------------------------------------------------------------------------------------------------------------------------------------------------------------------------------------------------------------------------------------------------------------------------------------------------------------------|-----------------------------------------------------------------------|----------------------------------------------------------------------------------------------------------------------------------------------------------------------------------------------------------------------------------------------------------------|
| <b>Reference</b>    | <b>Population</b>                                           | <b>Intervention</b>                                                                                                                                                                                                                                                                                                                                                  | <b>Amount of supervised practice</b>                                  | <b>Measurement instruments, moments, and outcome</b>                                                                                                                                                                                                           |
| Uemura et al., 2012 | N = 15 older adults                                         | <u>Task trained in experimental group:</u> Weight shifting exercises, start and stop exercises, and walking exercises with directional shifts.                                                                                                                                                                                                                       | All participants received 30 min of seated group training once a week | <u>Measurement instruments:</u><br>- Gait initiation test<br>- 10-metre steady-state gait test<br><br><u>Measurement moments:</u><br>Pre- and post-intervention<br><br><u>Between-group differences:</u><br>No significant differences in any of the outcomes. |
|                     | <u>Dual-task switch group:</u><br>n = 8; 82.4 yrs (SD: 5.9) | The secondary task included performing cognitive tasks (e.g. forward counting and reciting of letters from the Japanese alphabet, reciting as many things as possible from a category, and responding to an auditory cue as fast as possible). The focus of the STE was to improve the ability to initiate and switch movements quickly under a dual-task condition. | 24 sessions of 5 min in 24 weeks                                      |                                                                                                                                                                                                                                                                |
|                     | <u>Control exercise group:</u><br>n = 7; 82.4 yrs (SD: 6.8) | Walking exercises (e.g. backwards and sideways) were followed by cognitive exercises (e.g. reciting letters of the Japanese alphabet). The focus of the control group was to improve steady-state walking training under dual-task conditions.                                                                                                                       | 24 sessions of 5 min in 24 weeks                                      |                                                                                                                                                                                                                                                                |



**Table 7.** Detailed study characteristics of 43 studies on **dual-task learning** (continued).

| <b>OLDER ADULTS</b>   |                                                                     |                                                                                                                                                                                                                                                                                                      |                                      |                                                                                                                                                                                                                                                                                                                                                                                                                                                                                                                                                                                                                                                                                                                                                                                                                                                                  |
|-----------------------|---------------------------------------------------------------------|------------------------------------------------------------------------------------------------------------------------------------------------------------------------------------------------------------------------------------------------------------------------------------------------------|--------------------------------------|------------------------------------------------------------------------------------------------------------------------------------------------------------------------------------------------------------------------------------------------------------------------------------------------------------------------------------------------------------------------------------------------------------------------------------------------------------------------------------------------------------------------------------------------------------------------------------------------------------------------------------------------------------------------------------------------------------------------------------------------------------------------------------------------------------------------------------------------------------------|
| <b>Reference</b>      | <b>Population</b>                                                   | <b>Intervention</b>                                                                                                                                                                                                                                                                                  | <b>Amount of supervised practice</b> | <b>Measurement instruments, moments, and outcome</b>                                                                                                                                                                                                                                                                                                                                                                                                                                                                                                                                                                                                                                                                                                                                                                                                             |
| Wollesen et al., 2015 | N = 38 older adults                                                 | <u>Task trained in experimental group:</u> Walking and balancing.                                                                                                                                                                                                                                    |                                      | <u>Measurement instruments:</u><br>Gait measurements during single- and dual-tasking:<br>- Step width<br>- Step length (left and right)<br>- Gait line (left and right)<br>- Step length SD (left and right)<br>- Step width COV<br>- Step length COV (left and right)<br>- Peak pressure forefoot (left and right)<br>- Peak pressure midfoot (left and right)<br>- Peak pressure heel (left and right)<br><br><u>Measurement moments:</u><br>Pre- and post-intervention<br><br><u>Between-group differences:</u><br>Differences were found for gait line left and right (length of foot rolling movements) during single- and dual-task walking post-intervention in favour of the DTG.<br><br>Differences were also found for midfoot peak pressure left during single-tasking and left and right during dual-tasking post-intervention in favour of the DTG. |
|                       | <u>Dual-task training group (DTG):</u><br>n = 19; 73.2 yrs (SD: NR) | Participants performed motor tasks (e.g. brisk walking, starting and stopping, and avoiding obstacles) with cognitive tasks (e.g. paying attention to tripping hazards or speed rating). In the second phase of the trial, difficulty was increased with e.g. time pressure and task prioritisation. | 12 sessions of 60 min in 12 weeks    |                                                                                                                                                                                                                                                                                                                                                                                                                                                                                                                                                                                                                                                                                                                                                                                                                                                                  |
|                       | <u>Control group:</u><br>n = 19; 72.1 yrs (SD: NR)                  | Continuation of daily living.                                                                                                                                                                                                                                                                        | NA                                   |                                                                                                                                                                                                                                                                                                                                                                                                                                                                                                                                                                                                                                                                                                                                                                                                                                                                  |

**Table 7.** Detailed study characteristics of 43 studies on **dual-task learning** (continued).

| <b>OLDER ADULTS</b>    |                                                                                                                                                  |                                                                                                                                                                                                                                                                                                                               |                                      |                                                                                                                                                                                                                                                                                                                                                                                                                                                                                                                                                                                                                              |
|------------------------|--------------------------------------------------------------------------------------------------------------------------------------------------|-------------------------------------------------------------------------------------------------------------------------------------------------------------------------------------------------------------------------------------------------------------------------------------------------------------------------------|--------------------------------------|------------------------------------------------------------------------------------------------------------------------------------------------------------------------------------------------------------------------------------------------------------------------------------------------------------------------------------------------------------------------------------------------------------------------------------------------------------------------------------------------------------------------------------------------------------------------------------------------------------------------------|
| <b>Reference</b>       | <b>Population</b>                                                                                                                                | <b>Intervention</b>                                                                                                                                                                                                                                                                                                           | <b>Amount of supervised practice</b> | <b>Measurement instruments, moments, and outcome</b>                                                                                                                                                                                                                                                                                                                                                                                                                                                                                                                                                                         |
| Wollesen et al., 2017A | N = 78 older adults                                                                                                                              | <u>Task trained in experimental group:</u> Walking and balancing.                                                                                                                                                                                                                                                             |                                      | <u>Measurement instruments:</u><br>Gait measurements were made with a treadmill under single- and dual-tasking:<br>- Step length (left and right)<br>- Step width<br>- Gait line (left and right)<br>- Peak pressure – forefoot (left and right)<br>- Peak pressure – midfoot (left and right)<br>- Peak pressure – heel (left and right)<br><br><u>Measurement moments:</u><br>Pre- and post-intervention<br><br><u>Between-group differences:</u><br>Between-group differences were found for step length and gait line during single- and dual-task walking in favour of the BDT intervention compared to the SRG and CG. |
|                        | <u>Balance and task managing training group (BDT):</u><br>n = 29; 70.7 yrs (SD: 4.9)                                                             | Participants performed motor tasks (e.g. brisk walking, starting and stopping, and avoiding obstacles) together with cognitive tasks (e.g. paying attention to tripping hazards or speed rating). Also, task managing strategies were taught, such as, 'If you need to stop your walking, quickly bend your knees.'           | 12 sessions of 60 min in 12 weeks    |                                                                                                                                                                                                                                                                                                                                                                                                                                                                                                                                                                                                                              |
|                        | <u>Strength and resistance training group (SRG):</u><br>n = 23; 71.7 yrs (SD: 4.9)                                                               | General strength training of major muscle groups.                                                                                                                                                                                                                                                                             | 12 sessions of 60 min in 12 weeks    |                                                                                                                                                                                                                                                                                                                                                                                                                                                                                                                                                                                                                              |
|                        | <u>Control group (CG):</u><br>n = 26; 73.7 yrs (SD: 5.0)                                                                                         | Continuation of daily living.                                                                                                                                                                                                                                                                                                 | NA                                   |                                                                                                                                                                                                                                                                                                                                                                                                                                                                                                                                                                                                                              |
| Wollesen et al., 2017B | N = 95 older adults                                                                                                                              | <u>Task trained in experimental group:</u> Walking and balancing.                                                                                                                                                                                                                                                             |                                      | <u>Measurement instruments:</u><br>Gait measurements were made with a treadmill under single- and dual-tasking:<br>- Step length (left and right)<br>- Step width<br>- Gait line (left and right)<br><br><u>Other outcomes:</u><br>- Short Physical Performance Battery<br>- Stroop walking test                                                                                                                                                                                                                                                                                                                             |
|                        | <u>Dual-task + no-fear group (DTG):</u><br>n = 26; 72.2 yrs (SD: 4.6)<br><br><u>Dual-task + fear group (DTGF):</u><br>n = 30; 69.8 yrs (SD: 5.7) | Participants performed motor tasks (e.g. brisk walking, starting and stopping, and avoiding obstacles) with concurrent cognitive tasks (e.g. changing directions or following rhythms) which increased in difficulty over time. Participants were later subdivided into groups with a fear of falling and no fear of falling. | 12 sessions of 60 min in 12 weeks    |                                                                                                                                                                                                                                                                                                                                                                                                                                                                                                                                                                                                                              |

|  |                                                                                                                                          |                                                                                                                                    |           |                                                                                                                                                                                                                                                   |
|--|------------------------------------------------------------------------------------------------------------------------------------------|------------------------------------------------------------------------------------------------------------------------------------|-----------|---------------------------------------------------------------------------------------------------------------------------------------------------------------------------------------------------------------------------------------------------|
|  | <p><u>Control + no-fear group:</u><br/>n = 19; 72.9 yrs (SD: 4.4)</p> <p><u>Control + fear group:</u><br/>n = 20; 72.7 yrs (SD: 5.3)</p> | <p>Continuation of daily living. Participants were later subdivided into groups with a fear of falling and no fear of falling.</p> | <p>NA</p> | <p><u>Measurement moments:</u><br/>Pre- and post-intervention</p> <p><u>Between-group differences:</u><br/>Differences were found for step length in both feet and gait line in the right foot post-intervention in favour of the DTG groups.</p> |
|--|------------------------------------------------------------------------------------------------------------------------------------------|------------------------------------------------------------------------------------------------------------------------------------|-----------|---------------------------------------------------------------------------------------------------------------------------------------------------------------------------------------------------------------------------------------------------|

**Table 7.** Detailed study characteristics of 43 studies on **dual-task learning** (continued)

| <b>OLDER ADULTS</b>  |                                                                      |                                                                                                                                                                                                                                                                                                            |                                      |                                                                                                                                                                                                                                                                                                                                                                                                                                                                                                                                                                                                                                                                 |
|----------------------|----------------------------------------------------------------------|------------------------------------------------------------------------------------------------------------------------------------------------------------------------------------------------------------------------------------------------------------------------------------------------------------|--------------------------------------|-----------------------------------------------------------------------------------------------------------------------------------------------------------------------------------------------------------------------------------------------------------------------------------------------------------------------------------------------------------------------------------------------------------------------------------------------------------------------------------------------------------------------------------------------------------------------------------------------------------------------------------------------------------------|
| <b>Reference</b>     | <b>Population</b>                                                    | <b>Intervention</b>                                                                                                                                                                                                                                                                                        | <b>Amount of supervised practice</b> | <b>Measurement instruments, moments, and outcome</b>                                                                                                                                                                                                                                                                                                                                                                                                                                                                                                                                                                                                            |
| Yamada et al., 2011A | N = 84 older adults                                                  | <p><u>Task trained in experimental group:</u> DVD group training from a seated position.</p> <p>Stepping up and down, aerobic exercise with arm and leg movements targeting the major muscle groups, strength training with an elastic band around the leg, and balance training with weight shifting.</p> |                                      | <p><u>Measurement instruments:</u></p> <ul style="list-style-type: none"> <li>- 10-Metre Walking Test (10MWT)</li> <li>- Timed Up and Go Test</li> <li>- 5 Chair Stand Test</li> </ul> <p><u>Measurement moments:</u></p> <p>Pre- and post-intervention</p> <p><u>Between-group differences:</u></p> <p>Differences were found in the 10MWT during dual-task walking post-intervention in favour of the DTG.</p>                                                                                                                                                                                                                                                |
|                      | <u>Dual-task training group (DTG):</u><br>n = 41; 83.0 yrs (SD: 6.7) | During the stepping up and down exercise, participants performed cognitive tasks (e.g. naming animals, vegetables, and fruits, or words that start with an A).                                                                                                                                             | 48 sessions of 20 min in 24 weeks    |                                                                                                                                                                                                                                                                                                                                                                                                                                                                                                                                                                                                                                                                 |
|                      | <u>Control group:</u><br>n = 43; 82.9 yrs (SD: 5.5)                  | Continuation of daily living.                                                                                                                                                                                                                                                                              | NA                                   |                                                                                                                                                                                                                                                                                                                                                                                                                                                                                                                                                                                                                                                                 |
| Yamada et al., 2011B | N = 50 older adults                                                  | <p><u>Task trained in experimental group:</u> DVD group training from a seated position.</p> <p>Stepping up and down, aerobic exercise with arm and leg movements targeting the major muscle groups, strength training with an elastic band around the leg, and balance training with weight shifting.</p> |                                      | <p><u>Measurement instruments:</u></p> <p>Gait parameters were measured under single-tasking and cognitive and motor dual-tasking:</p> <ul style="list-style-type: none"> <li>- Gait speed</li> <li>- 10 m walking step</li> <li>- 10 m walking cadence</li> <li>- Dual-task costs</li> </ul> <p><u>Other outcomes:</u></p> <ul style="list-style-type: none"> <li>- Timed Up and Go Test</li> <li>- Functional reach</li> <li>- Single-leg stance</li> <li>- Number of steps/5sec</li> <li>- Number of stepped figures/5sec</li> </ul> <p><u>Measurement moments:</u></p> <p>Pre- and post-intervention</p> <p><u>Between-group differences:</u></p> <p>NR</p> |
|                      | <u>Dual-task training group:</u><br>n = 26; 80.3 yrs (SD: 5.4)       | During the stepping up and down exercise, participants performed cognitive tasks (e.g. naming animals, vegetables, and fruits, or words that start with an A).                                                                                                                                             | 24 sessions of 50 min in 24 weeks    |                                                                                                                                                                                                                                                                                                                                                                                                                                                                                                                                                                                                                                                                 |
|                      | <u>Single-task training group:</u><br>n = 24; 81.2 yrs (SD: 7.6)     | Participants performed the same exercise as the dual-task training group minus the secondary cognitive task.                                                                                                                                                                                               | 24 sessions of 50 min in 24 weeks    |                                                                                                                                                                                                                                                                                                                                                                                                                                                                                                                                                                                                                                                                 |

**Table 7.** Detailed study characteristics of 43 studies on **dual-task learning** (continued).

| <b>OLDER ADULTS WITH BALANCE IMPAIRMENTS</b> |                                                                               |                                                                                                                                                                                                                                                |                                      |                                                                                                                                                                                                                                                                                                                                                                                                                                                                                                                                                                                                                                                                                                                                 |
|----------------------------------------------|-------------------------------------------------------------------------------|------------------------------------------------------------------------------------------------------------------------------------------------------------------------------------------------------------------------------------------------|--------------------------------------|---------------------------------------------------------------------------------------------------------------------------------------------------------------------------------------------------------------------------------------------------------------------------------------------------------------------------------------------------------------------------------------------------------------------------------------------------------------------------------------------------------------------------------------------------------------------------------------------------------------------------------------------------------------------------------------------------------------------------------|
| <b>Reference</b>                             | <b>Population</b>                                                             | <b>Intervention</b>                                                                                                                                                                                                                            | <b>Amount of supervised practice</b> | <b>Measurement instruments, moments, and outcome</b>                                                                                                                                                                                                                                                                                                                                                                                                                                                                                                                                                                                                                                                                            |
| Azadian et al., 2016                         | N = 30 older adults with balance impairments                                  | <u>Task trained in experimental group:</u> Gait training and balancing.                                                                                                                                                                        |                                      | <u>Measurement instruments:</u><br>Gait analysis was measured with the Vicon system:<br>- Cadence (steps/min) - Gait speed<br>- Stride time - Stride length<br>- Stance time - Step length<br>- Swing time - Opposite foot off<br>- Step time - Opposite foot contact<br>- Single support - Foot off<br>- Double support<br><br><u>Measurement moments:</u><br>Pre- and post-intervention<br><br><u>Between-group differences:</u><br>Differences were found for cadence, stride time, stance time, swing time, and single support time in favour of the DTG and EFG compared to the CG.<br><br>Differences were also found for gait speed, step time, and double support time in favour of the EFG compared to the DTG and CG. |
|                                              | <u>Dual-task training group (DTG):</u><br>n = 10; 73.9 yrs (SD: 5.5 yrs)      | Standing and walking exercises (e.g. weight shifting in stance) with a concurrent cognitive task (e.g. naming animals), the difficulty of which increased over time.                                                                           | 24 sessions of 45 min in 8 wks       |                                                                                                                                                                                                                                                                                                                                                                                                                                                                                                                                                                                                                                                                                                                                 |
|                                              | <u>Executive function training EFG):</u><br>n = 10; 73.8 yrs (SD: 3.9 yrs)    | A mix of 20 tasks involving working memory, and inhibitory and speed processing tasks.                                                                                                                                                         | 24 sessions of 45 min in 8 wks       |                                                                                                                                                                                                                                                                                                                                                                                                                                                                                                                                                                                                                                                                                                                                 |
|                                              | <u>Control group (CG):</u><br>n = 11; 73.7 yrs (SD: 4.4 yrs)                  | Continuation of daily living.                                                                                                                                                                                                                  | NA                                   |                                                                                                                                                                                                                                                                                                                                                                                                                                                                                                                                                                                                                                                                                                                                 |
| Khan et al., 2018                            | N = 39 older adults with balance impairments                                  | <u>Task trained in experimental group:</u> Balance training, e.g. practising weight shifting, transfer, and static/dynamic standing.                                                                                                           |                                      | <u>Measurement instruments:</u><br>- Functional Reach Test<br>- Timed Up and Go Test (TUG)<br>- Berg Balance Scale (BBS)<br>- 10-Metre Walk Test<br><br><u>Measurement moments:</u><br>Pre- and post-intervention<br><br><u>Between-group differences:</u><br>Differences were found for TUG and BBS post-intervention in favour of the TCG group.                                                                                                                                                                                                                                                                                                                                                                              |
|                                              | <u>Dual-task training group:</u><br>n = 19; 63 yrs (SD: NA)                   | The secondary motor task included holding a glass of water, throwing/catching a ball, placing pencils in holes of a covered cup, cardboard pin plugging, pegging a board in 2 different containers, transferring objects at different heights. | 18 sessions of 40-50 min in 6 weeks  |                                                                                                                                                                                                                                                                                                                                                                                                                                                                                                                                                                                                                                                                                                                                 |
|                                              | <u>Turning and cognitive training group (TCG):</u><br>n = 20; 63 yrs (SD: NA) | The secondary cognitive tasks included verbal fluency, sentence completion, forward/backward counting from 1-10, 3-serial subtraction, an auditory choice reaction task, and visuospatial tasks.                                               | 18 sessions of 40-50 min in 6 weeks  |                                                                                                                                                                                                                                                                                                                                                                                                                                                                                                                                                                                                                                                                                                                                 |



**Table 7.** Detailed study characteristics of 43 studies on **dual-task learning** (continued)

| <b>OLDER ADULTS WITH BALANCE IMPAIRMENTS</b> |                                                                                  |                                                                                                                                                                                                                          |                                      |                                                                                                                                                                                                                                                                                                                                                                                                                                                                                                                                                                                                                                                                           |
|----------------------------------------------|----------------------------------------------------------------------------------|--------------------------------------------------------------------------------------------------------------------------------------------------------------------------------------------------------------------------|--------------------------------------|---------------------------------------------------------------------------------------------------------------------------------------------------------------------------------------------------------------------------------------------------------------------------------------------------------------------------------------------------------------------------------------------------------------------------------------------------------------------------------------------------------------------------------------------------------------------------------------------------------------------------------------------------------------------------|
| <b>Reference</b>                             | <b>Population</b>                                                                | <b>Intervention</b>                                                                                                                                                                                                      | <b>Amount of supervised practice</b> | <b>Measurement instruments, moments, and outcome</b>                                                                                                                                                                                                                                                                                                                                                                                                                                                                                                                                                                                                                      |
| Silsupadol et al., 2009<br>A&B               | N = 21 older adults with balance impairments                                     | <u>Task trained in experimental group:</u> Balance training.                                                                                                                                                             |                                      | <u>Measurement instruments:</u><br>Gait speed and stride length were measured for narrow walk and obstacle course in single- and dual-tasking:<br>- Gait speed<br>- Stride length<br><br><u>Other outcomes:</u><br>- Berg Balance Scale<br>- Activities-Specific Balance Confidence Scale<br><br><u>Measurement moments:</u><br>Pre- and post-intervention<br><br><u>Between-group differences:</u><br>Differences were found for dual-tasking gait speed post-intervention in favour of the DTVG and DTFG compared to the STG.<br><br>Differences were also found for the dual-tasking narrow walk post-intervention in favour of the DTVG compared to the DTFG and STG. |
|                                              | <u>Dual-tasking variable priority group (DTVG):</u><br>n = 6; 76.0 yrs (SD: 4.7) | Progressive balance exercise programme related to body stability and transport while performing cognitive tasks (e.g. remembering numbers). Focus was first put on the motor task and later on the cognitive task.       | 12 sessions of 45 min in 4 weeks     |                                                                                                                                                                                                                                                                                                                                                                                                                                                                                                                                                                                                                                                                           |
|                                              | <u>Dual-tasking fixed priority group (DTFG):</u><br>n = 8; 74.4 yrs (SD: 6.2)    | Progressive balance exercise programme related to body stability and transport while performing cognitive tasks (e.g. remembering numbers). Participants were instructed to maintain focus on both tasks.                | 12 sessions of 45 min in 4 weeks     |                                                                                                                                                                                                                                                                                                                                                                                                                                                                                                                                                                                                                                                                           |
|                                              | <u>Single-task training group (STG):</u><br>n = 7; 74.7 yrs (SD: 7.8)            | Progressive balance exercise programme related to body stability and transport.                                                                                                                                          | 12 sessions of 45 min in 4 weeks     |                                                                                                                                                                                                                                                                                                                                                                                                                                                                                                                                                                                                                                                                           |
| <b>OLDER ADULTS WITH A HISTORY OF FALLS</b>  |                                                                                  |                                                                                                                                                                                                                          |                                      |                                                                                                                                                                                                                                                                                                                                                                                                                                                                                                                                                                                                                                                                           |
| <b>Reference</b>                             | <b>Population</b>                                                                | <b>Intervention</b>                                                                                                                                                                                                      | <b>Amount of supervised practice</b> | <b>Measurement instruments, moments, and outcome</b>                                                                                                                                                                                                                                                                                                                                                                                                                                                                                                                                                                                                                      |
| Park et al., 2022                            | N = 58 older adults with a history of falls                                      | <u>Task trained in experimental group:</u> Walking and balance training.                                                                                                                                                 |                                      | <u>Measurement instruments:</u><br>- One Leg Standing Test<br>- Timed Up and Go Test<br><br><u>Measurement moments:</u><br>Pre- and post-intervention<br><br><u>Between-group differences:</u><br>Differences were found for all outcomes in favour of the DTG.                                                                                                                                                                                                                                                                                                                                                                                                           |
|                                              | <u>Dual-task training group (DTG):</u><br><br>n = 29; 71.8 yrs (SD: 3.2)         | Motor tasks (e.g. alternatively placing a foot on a step, walking, or stepping over an obstacle) were combined with cognitive tasks (e.g. reciting days backwards, double-digit subtraction, or carrying a grocery bag). | 12 sessions of 45 min in 6 wks       |                                                                                                                                                                                                                                                                                                                                                                                                                                                                                                                                                                                                                                                                           |
|                                              | <u>Balance training group:</u><br>n = 29; 70.9 yrs (SD: 2.8)                     | Stability exercises (e.g. tandem stance, walking backwards, transfer from one chair to another) without secondary tasks.                                                                                                 | 12 sessions of 45 min in 6 wks       |                                                                                                                                                                                                                                                                                                                                                                                                                                                                                                                                                                                                                                                                           |





**Table 7.** Detailed study characteristics of 43 studies on **dual-task learning** (continued)

| <b>OLDER ADULTS WITH COGNITIVE IMPAIRMENTS</b> |                                                                                     |                                                                                                                                                                                                                                               |                                      |                                                                                                                                                                                                                                            |
|------------------------------------------------|-------------------------------------------------------------------------------------|-----------------------------------------------------------------------------------------------------------------------------------------------------------------------------------------------------------------------------------------------|--------------------------------------|--------------------------------------------------------------------------------------------------------------------------------------------------------------------------------------------------------------------------------------------|
| <b>Reference s</b>                             | <b>Population</b>                                                                   | <b>Intervention</b>                                                                                                                                                                                                                           | <b>Amount of supervised practice</b> | <b>Measurement instruments, moments, and outcome</b>                                                                                                                                                                                       |
| Delbroek et al., 2017                          | N = 60 older adults with mild cognitive impairment                                  | <u>Task trained in experimental group:</u> Standing balance tasks including weight-bearing exercises on BioRescue platform.                                                                                                                   |                                      | <u>Measurement instruments:</u><br>- Performance-Oriented Mobility Assessment                                                                                                                                                              |
|                                                | <u>Dual-task training (with the BioRescue) group:</u><br>n = 10; 86.9 yrs (SD: 5.6) | Training programme with the BioRescue (RM Ingenierie, France). The secondary tasks included memory exercises (e.g. remembering cards) or avoiding objects.                                                                                    | 12 sessions of 24 min in 6 weeks     | Instrumented Timed Up and Go Test during single-tasking:<br>- Total duration<br>- Turn: duration<br>- Sit to stand: duration<br>- Turn to sit: duration<br>- Turn: step-time before turn                                                   |
|                                                | <u>Control group:</u><br>n = 10; 87.5 yrs (SD: 6.6)                                 | Continuation of usual care in the nursing home if applicable.                                                                                                                                                                                 | 6 weeks (sessions NR)                | iTUG during dual-tasking:<br>- Turn: duration<br>- Sit to stand: duration<br>- Turn: step time before turn<br>- Error rate<br><br><u>Measurement moments:</u><br>Pre- and post-intervention<br><br><u>Between-group differences:</u><br>NR |
| Kuo et al., 2022                               | N = 30 older adults with mild cognitive impairment                                  | <u>Task trained in experimental group:</u> Walking.                                                                                                                                                                                           |                                      | <u>Measurement instruments:</u><br>Gait performance under <u>single</u> and under <u>cognitive and motor</u> dual-task conditions                                                                                                          |
|                                                | <u>Cognitive dual-task training group (CDTT):</u><br>n = 9; 80 yrs (SD: NA)         | Cognitive tasks during walking on level surface. Cognitive tasks included repeating phrases, counting forwards or backwards, playing phonemic word chain games, reciting a poem, having conversations, and reciting a sentence backwards.     | 24 sessions of 45 min in 8 weeks     | - Speed<br>- Cadence<br>- Stride length<br>- Stride time<br>- Spatial variability                                                                                                                                                          |
|                                                | <u>Motor dual-task training Group (MDTT):</u><br>n = 11; 87 yrs (SD: NA)            | Motor tasks during walking on level surface. Motor tasks included holding balls, raising an umbrella with both hands, waving a rattle, beating a castanet, bouncing a basketball, and holding one ball and concurrently kicking a basketball. | 24 sessions of 45 min in 8 weeks     | - Temporal variability<br>- Dual-task costs (only within dual-task conditions)<br><br><u>Measurement moments:</u><br>Pre- and post-intervention and 4-week follow-up                                                                       |

**Table 7.** Detailed study characteristics of 43 studies on **dual-task learning** (continued)

| <b>OLDER ADULTS WITH COGNITIVE IMPAIRMENTS</b> |                                                                                     |                                                                                                                                                                                                                                                                                                                                                                                                                         |                                      |                                                                                                                                                                                                                             |
|------------------------------------------------|-------------------------------------------------------------------------------------|-------------------------------------------------------------------------------------------------------------------------------------------------------------------------------------------------------------------------------------------------------------------------------------------------------------------------------------------------------------------------------------------------------------------------|--------------------------------------|-----------------------------------------------------------------------------------------------------------------------------------------------------------------------------------------------------------------------------|
| <b>Reference s</b>                             | <b>Population</b>                                                                   | <b>Intervention</b>                                                                                                                                                                                                                                                                                                                                                                                                     | <b>Amount of supervised practice</b> | <b>Measurement instruments, moments, and outcome</b>                                                                                                                                                                        |
| Kuo et al., 2022 (continued)                   | <u>Conventional physical therapy group (CPT):</u><br><i>n</i> = 10; 79 yrs (SD: NA) | A multicomponent exercise programme consisting of muscle strengthening, balance, and gait training.                                                                                                                                                                                                                                                                                                                     | 24 sessions of 45 min in 8 weeks     | <u>Between-group differences:</u><br>Differences were found for motor dual-task walking performance in favour of the MDTT and CDTT groups compared to the CPT group. Only the MDTT maintained this result in the follow-up. |
| Parial et al., 2022                            | <i>N</i> = 60 older adults with mild cognitive impairment                           | <u>Task trained in experimental group:</u> Zumba dance                                                                                                                                                                                                                                                                                                                                                                  |                                      | <u>Measurement instruments:</u><br>- Short Physical Performance Battery                                                                                                                                                     |
|                                                | <u>Dual-task Zumba Gold:</u><br><i>n</i> = 30; 63.3 yrs (SD: 4.5)                   | Besides the Zumba Gold dancing routine, the following secondary tasks were performed: answering questions about the participants' orientation to a person (identifying their names), time (date, month, or year), and place (current location); forward and backward serial counting; doing arm-clock positions based on prompts; forward and backward recall of word/number series; and forward and backward spelling. | 36 sessions of 60 min in 12 weeks    | <u>Measurement moments:</u><br>Pre- and post-intervention, and 6-week follow-up<br><br><u>Between-group differences:</u><br>NR                                                                                              |
|                                                | <u>Control group:</u><br><i>n</i> = 30; 64.3 yrs (SD: 5.9)                          | Participants received health education on dementia risk reduction, which highlighted the importance of physical activities and lifestyle factors for preventing cognitive decline. Participants were instructed to perform moderate physical/leisure activities.                                                                                                                                                        | 36 sessions of 60 min in 12 weeks    |                                                                                                                                                                                                                             |

*N* = number of participants in total, *n* = number of participants per group, *SD* = standard deviation, *NA* = not applicable, *NR* = not reported, *DTG* = Dual-task training group; *STG* = Single-task training group, *CG* = control group, *MFT* = Manual Function Test, *DTBG* = Dual-Task Balance training Group, *BBS* = Berg Balance Scale, *DTI* = dual-task intervention group, *IDI* = Iranian dance group, *5XSST* = Five Times Sit to Stand Test, *TUG* = Timed Up and Go Test, *KATZ* = Katz Activities of Daily Living Scale, *FIM* = Functional Independence Measurement, *SDTG* = Specific dual-task training group, *DTC* = Dual-task costs, *IDTG* = Integrated dual-task training group, *FTSTS* = Five Times Sit to Stand Test, *DGI* = Dynamic Gait Index, *UPDR* = Unified Parkinson's Disease Rating Scale, *CDTT* = Cognitive dual-task gait training group, *MDTT* = Motor dual-task gait training group, *CTT* = Control training group, *F8W* = Figure of 8 Walk, *MMDTG* = Motor-motor training group, *MCDTG* = Motor-cognitive training group, *EIG* = Early intervention group, *10MWT* = 10-Metre Walking Test, *EFG* = Executive function training, *DTVG* = Dual-tasking variable priority group, *DTFG* = Dual-tasking fixed priority group, *CDTT* = Cognitive dual-task training group, *MDTT* = Motor dual-task training group, *CDT* = Conventional physical therapy group
